# Supplementary material
Source: PubMed Central journal article supplement (PMC3092631)

Supporting Information

**A Method for the Deprotection of Alkylpinacolyl Boronate Esters**

Jing Sun, Michael Perfetti and Webster L. Santos\*

*Department of Chemistry, Virginia Tech, Blacksburg, Virginia, 24061*

- **General Information .....2**
- **$^1\text{H}$ ,  $^{13}\text{C}$  and  $^{11}\text{B}$  NMR spectra for 2a-2k.....3-32**
- **$^1\text{H}$ ,  $^{13}\text{C}$  and  $^{11}\text{B}$  NMR spectra for 3a,3b,3f,3g,3j.....33-50**
- **$^1\text{H}$  and  $^{13}\text{C}$  NMR spectra for reisolated pinacolyl boronate esters 3c-3e, 3h, 3i...51-60**

**General Information:**

$^1\text{H}$  NMR spectra were recorded on either a 500 MHz or 400 MHz spectrometer. Chemical shifts are reported in ppm with the solvent resonance as the internal standard ( $\text{CDCl}_3$ : 7.26 ppm). Data are reported as follows: chemical shift, multiplicity (s = singlet, d = doublet, t = triplet, q = quartet, m = multiplet, br = broad), coupling constants (Hz), and assignment.  $^{13}\text{C}$  NMR spectra were recorded on a 125 MHz spectrometer. Chemical shifts are reported in ppm with the solvent resonance as the internal standard ( $\text{CDCl}_3$ : 77.16 ppm). The carbon directly attached to boron was not observed due to quadrupolar relaxation.  $^{11}\text{B}$  NMR spectra were recorded on a 160 MHz spectrometer. Chemical shifts are reported in ppm with boron trifluoride diethyl etherate as an external standard ( $\text{BF}_3\text{O}(\text{C}_2\text{H}_5)_2$ : 0 ppm).

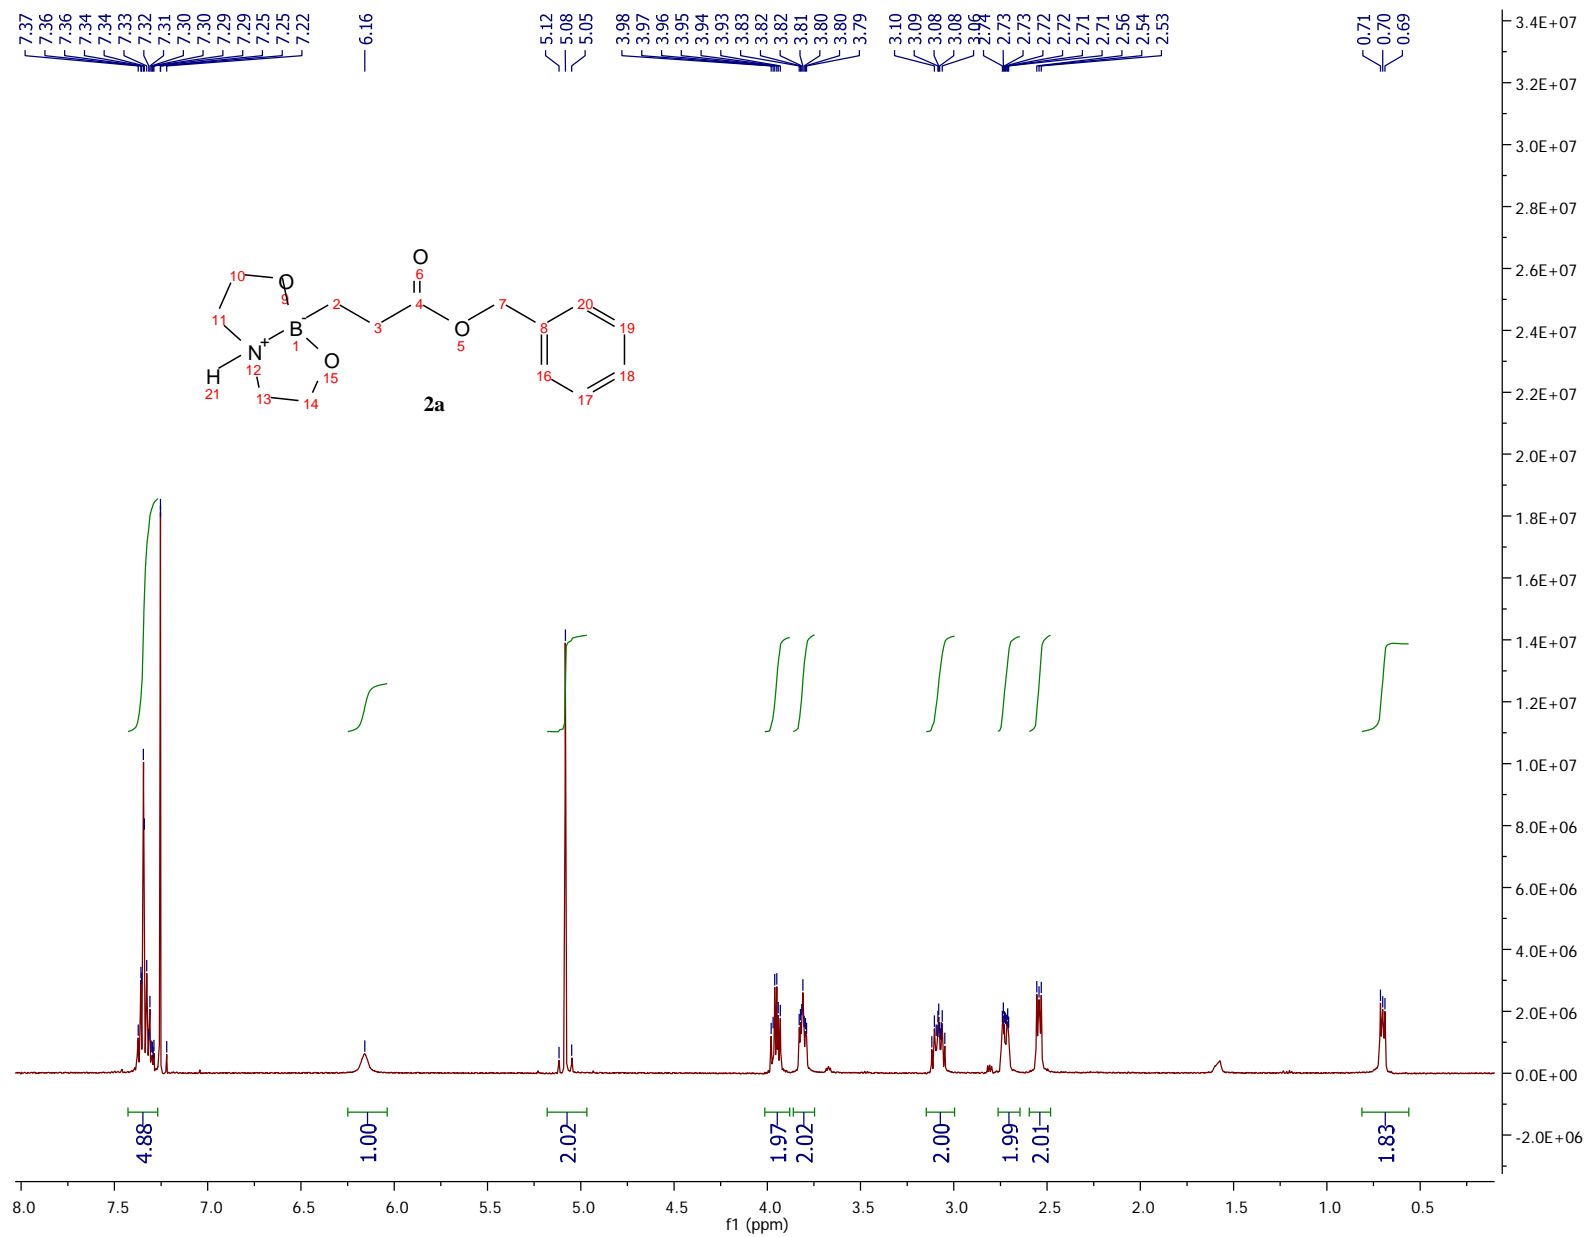

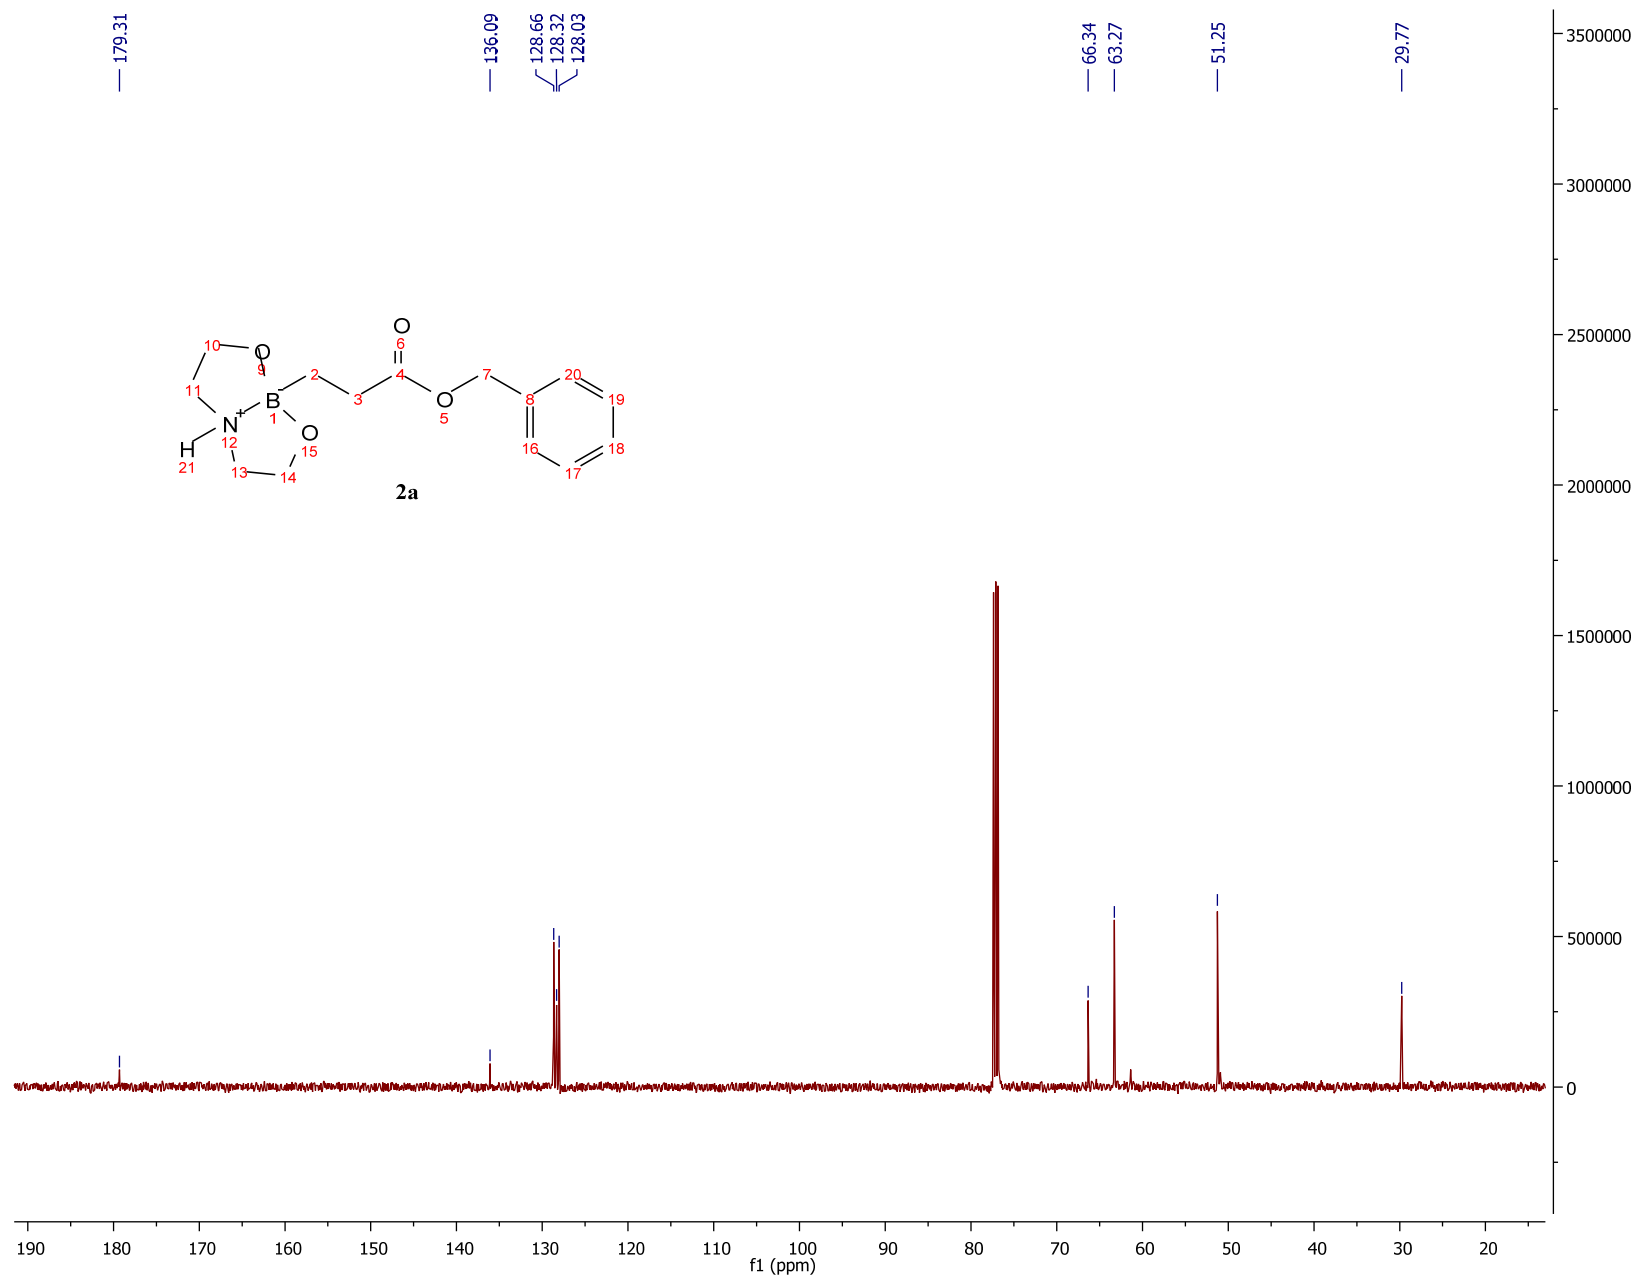

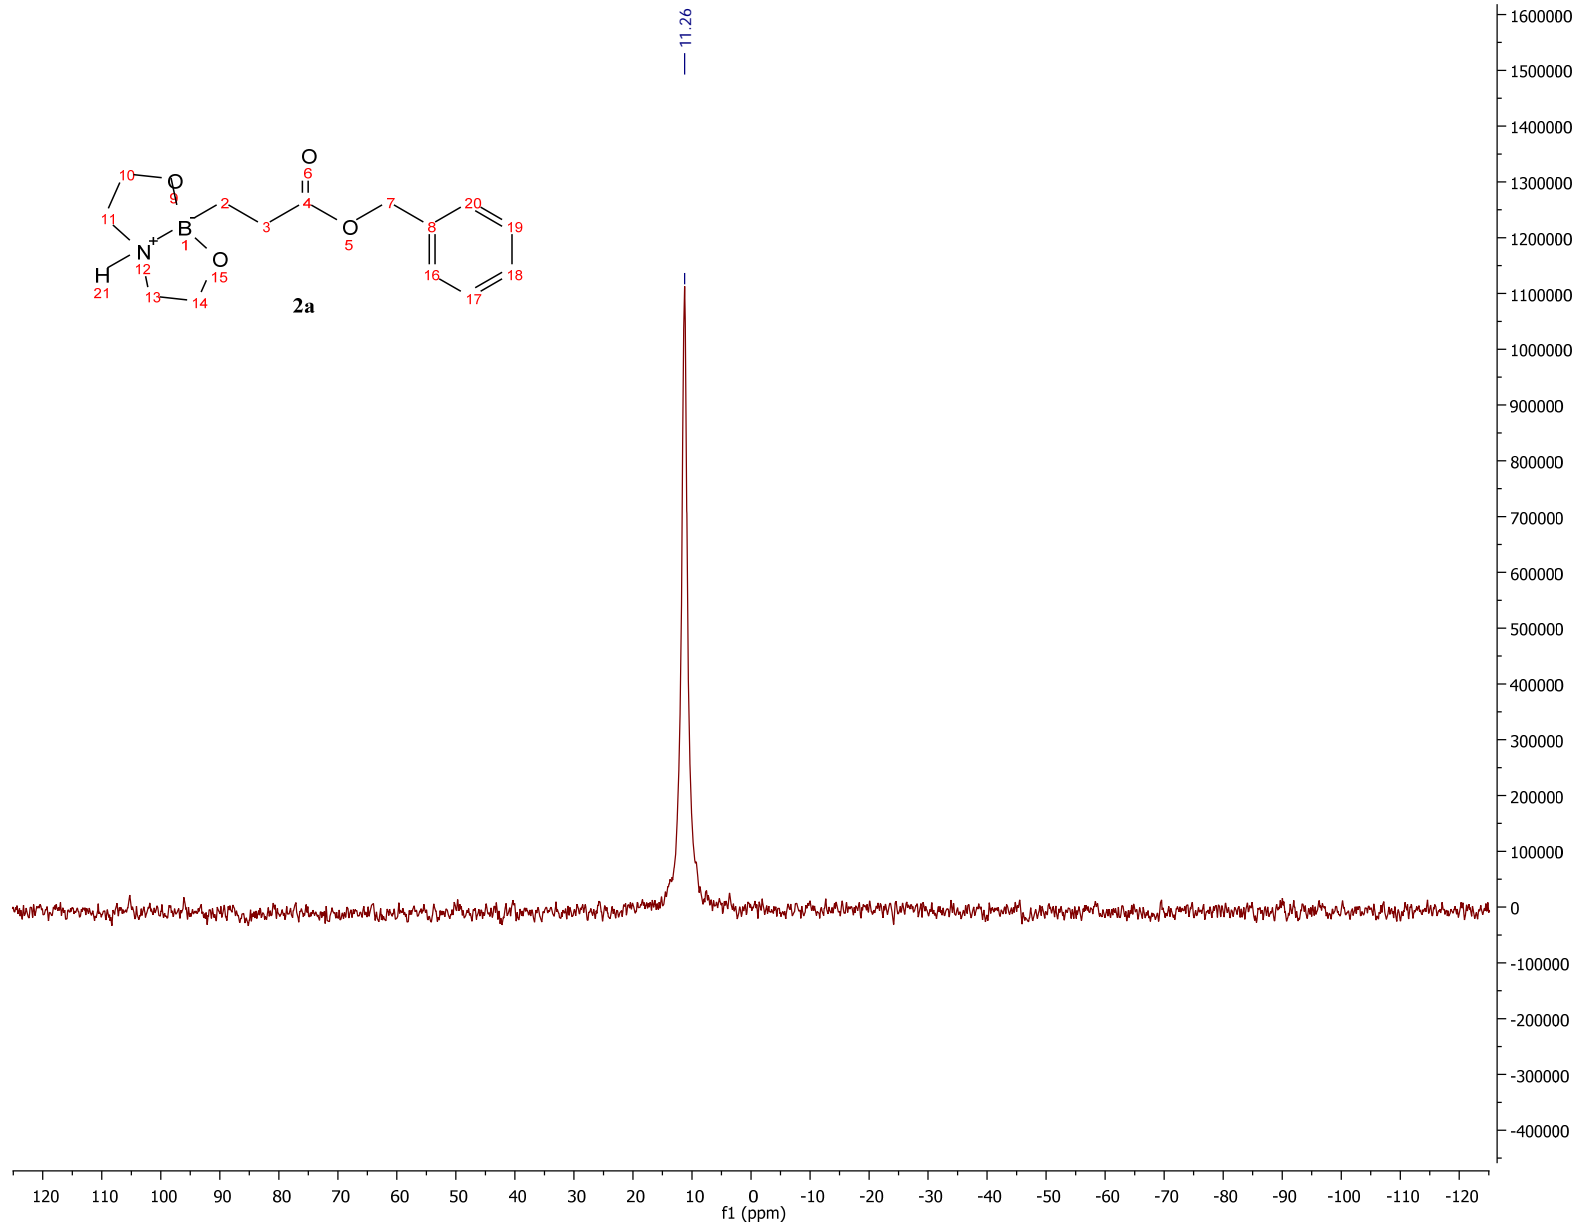

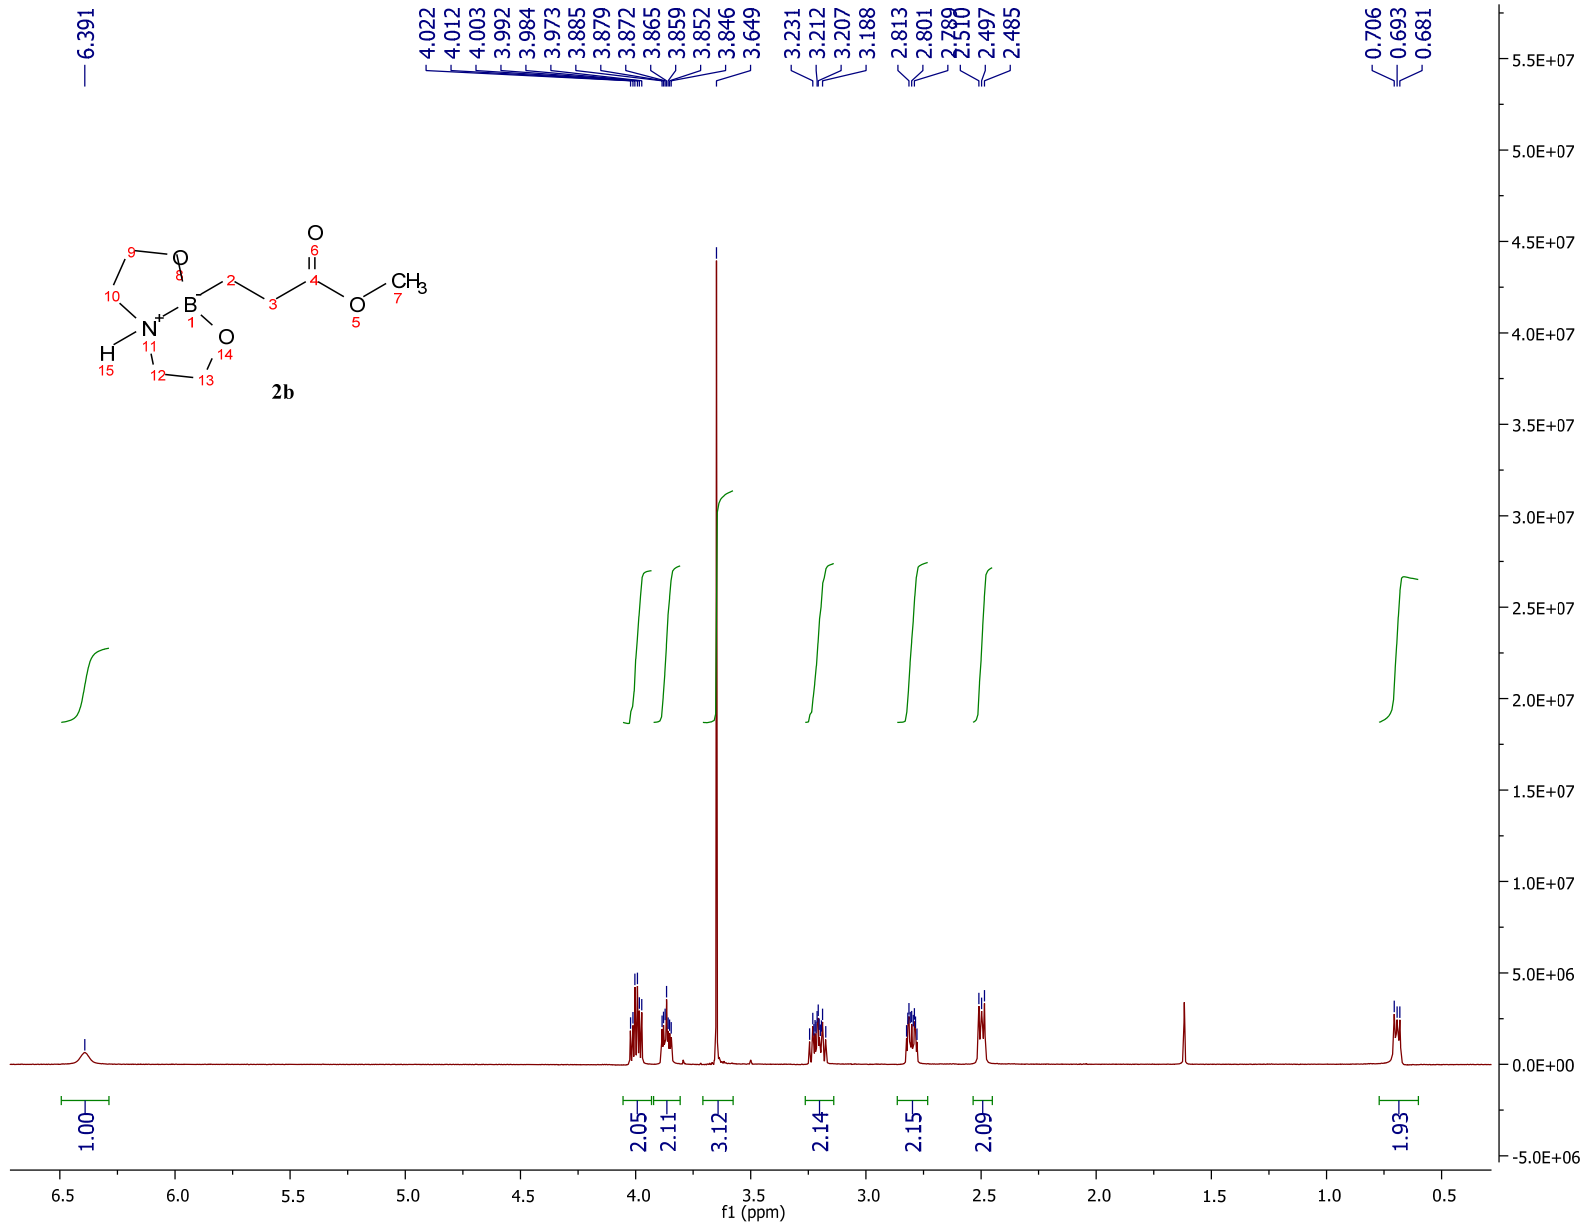

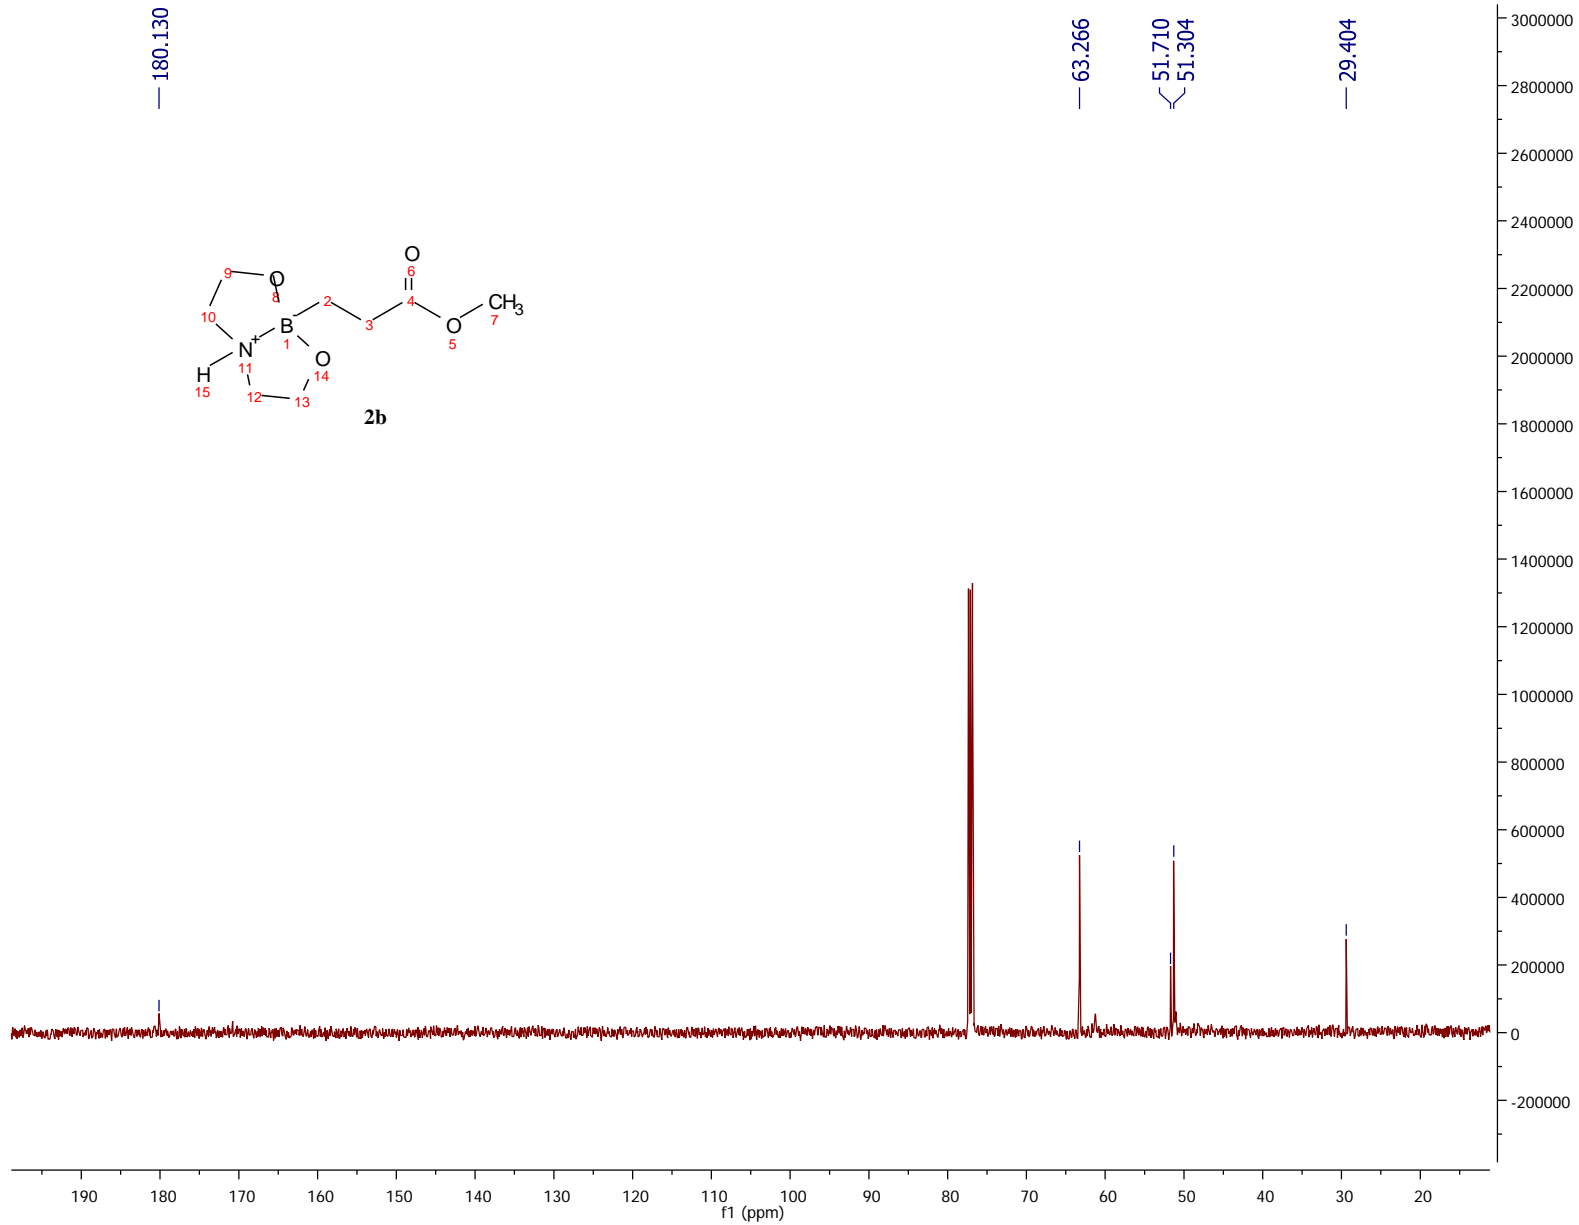

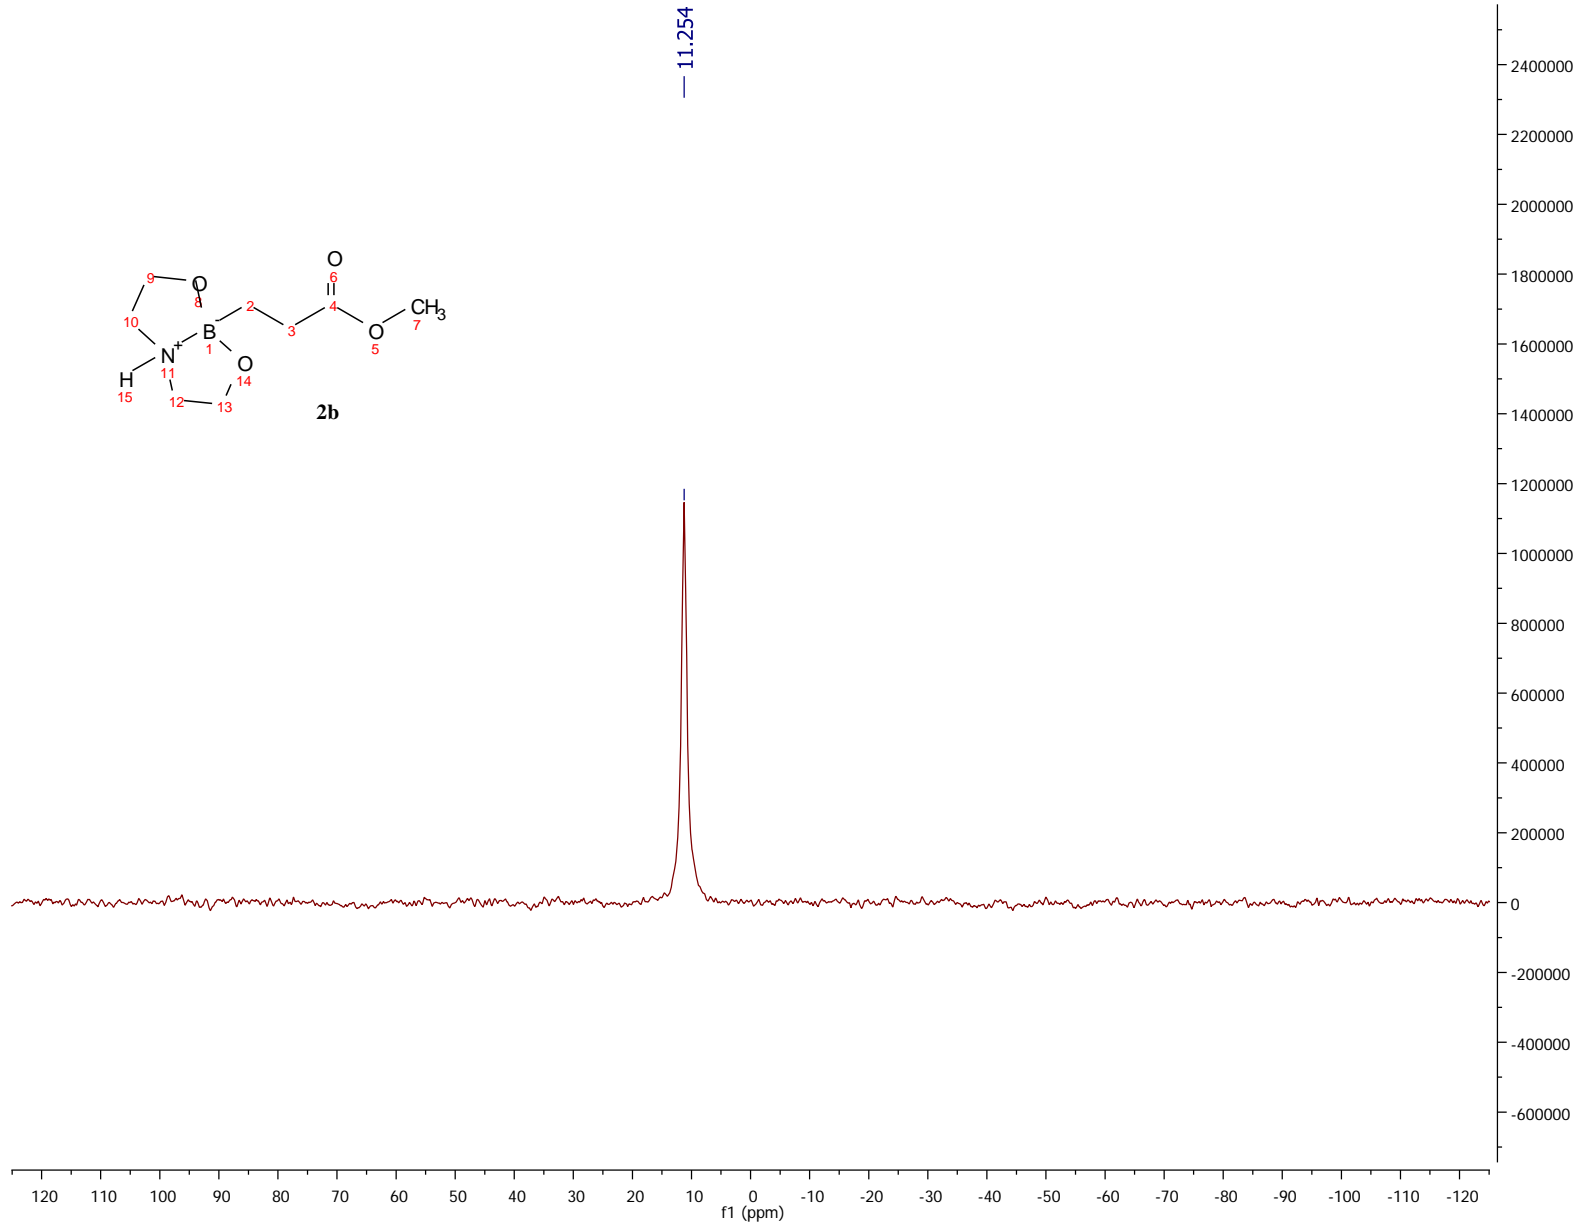



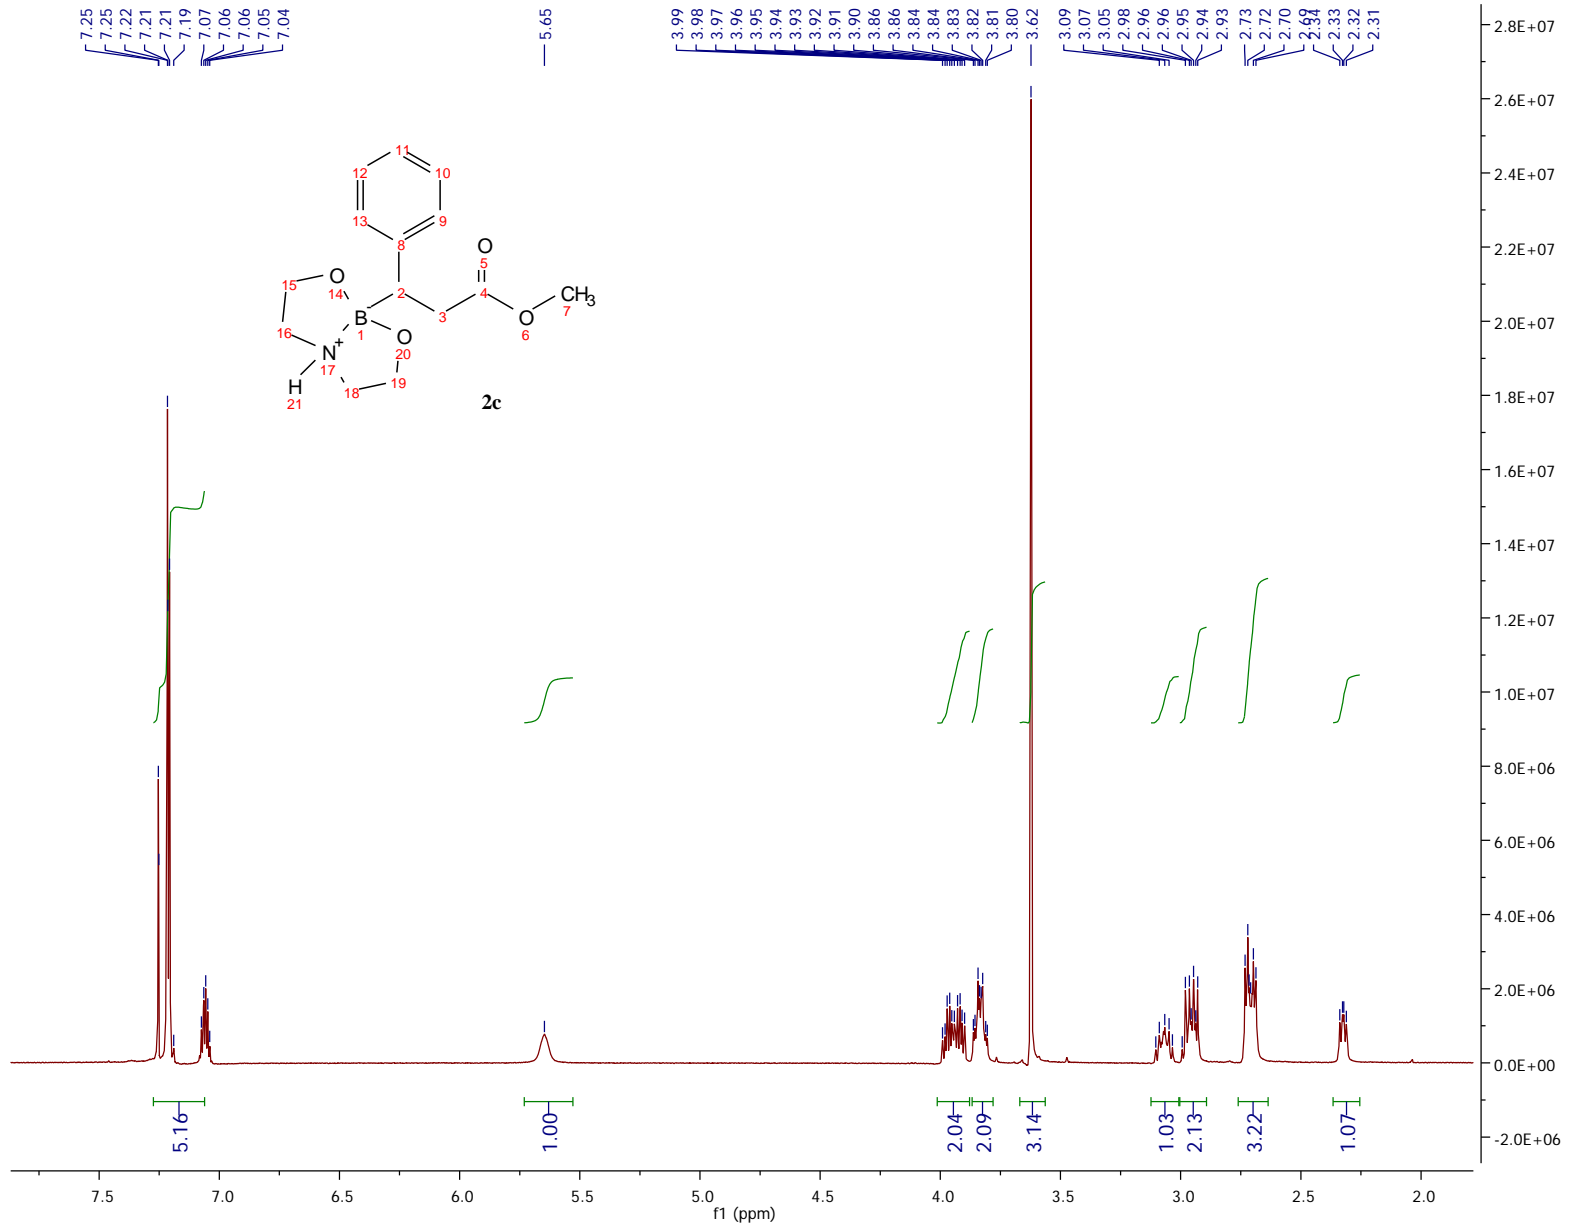

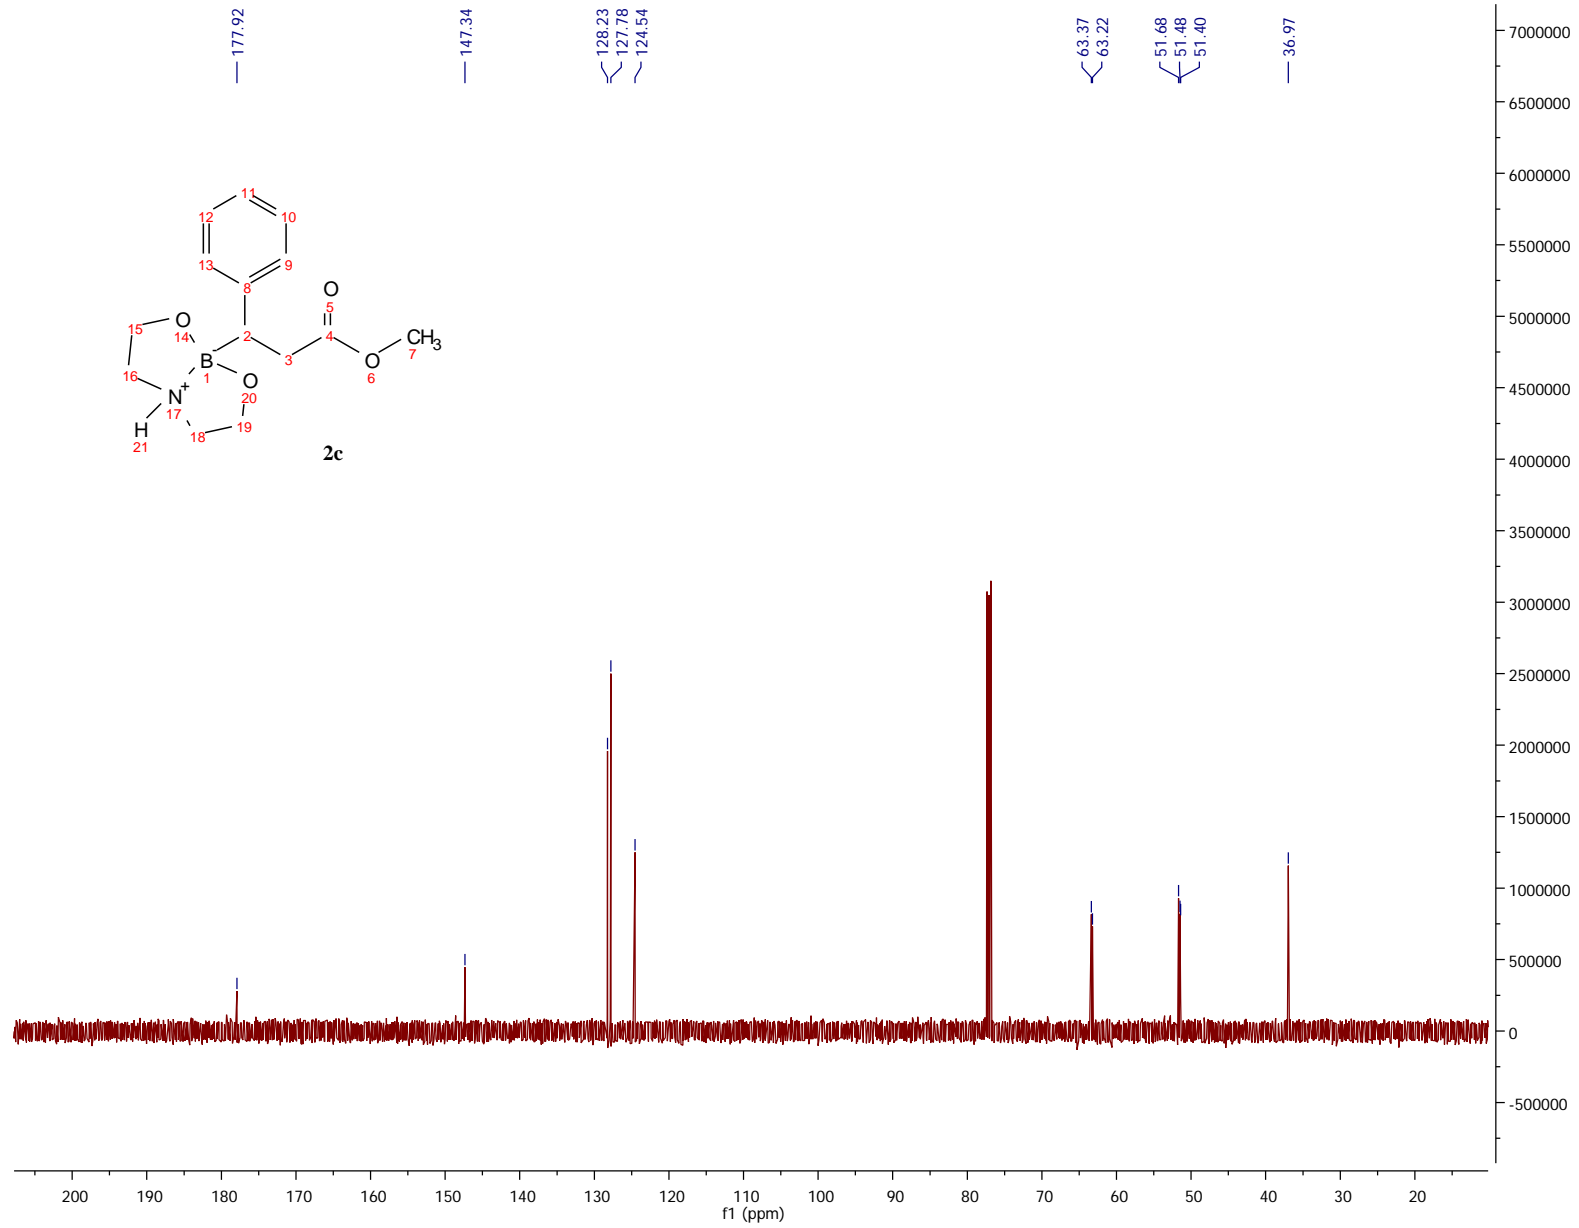



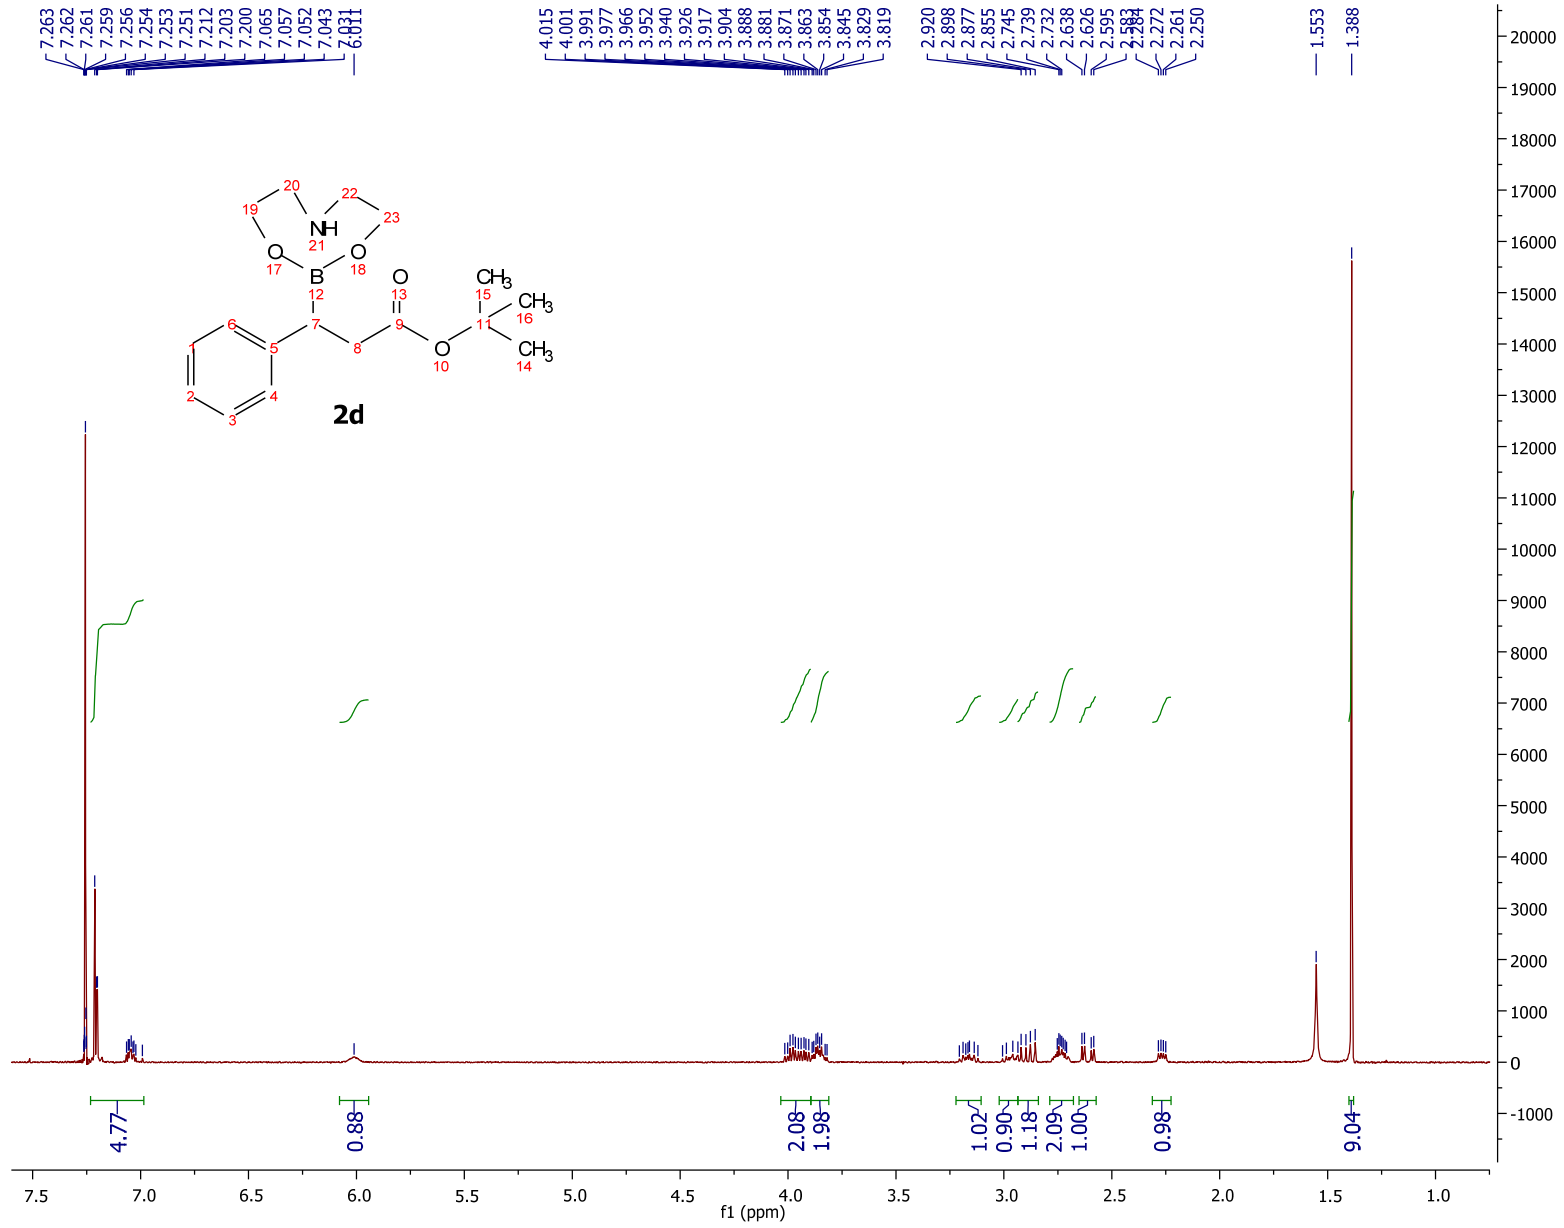

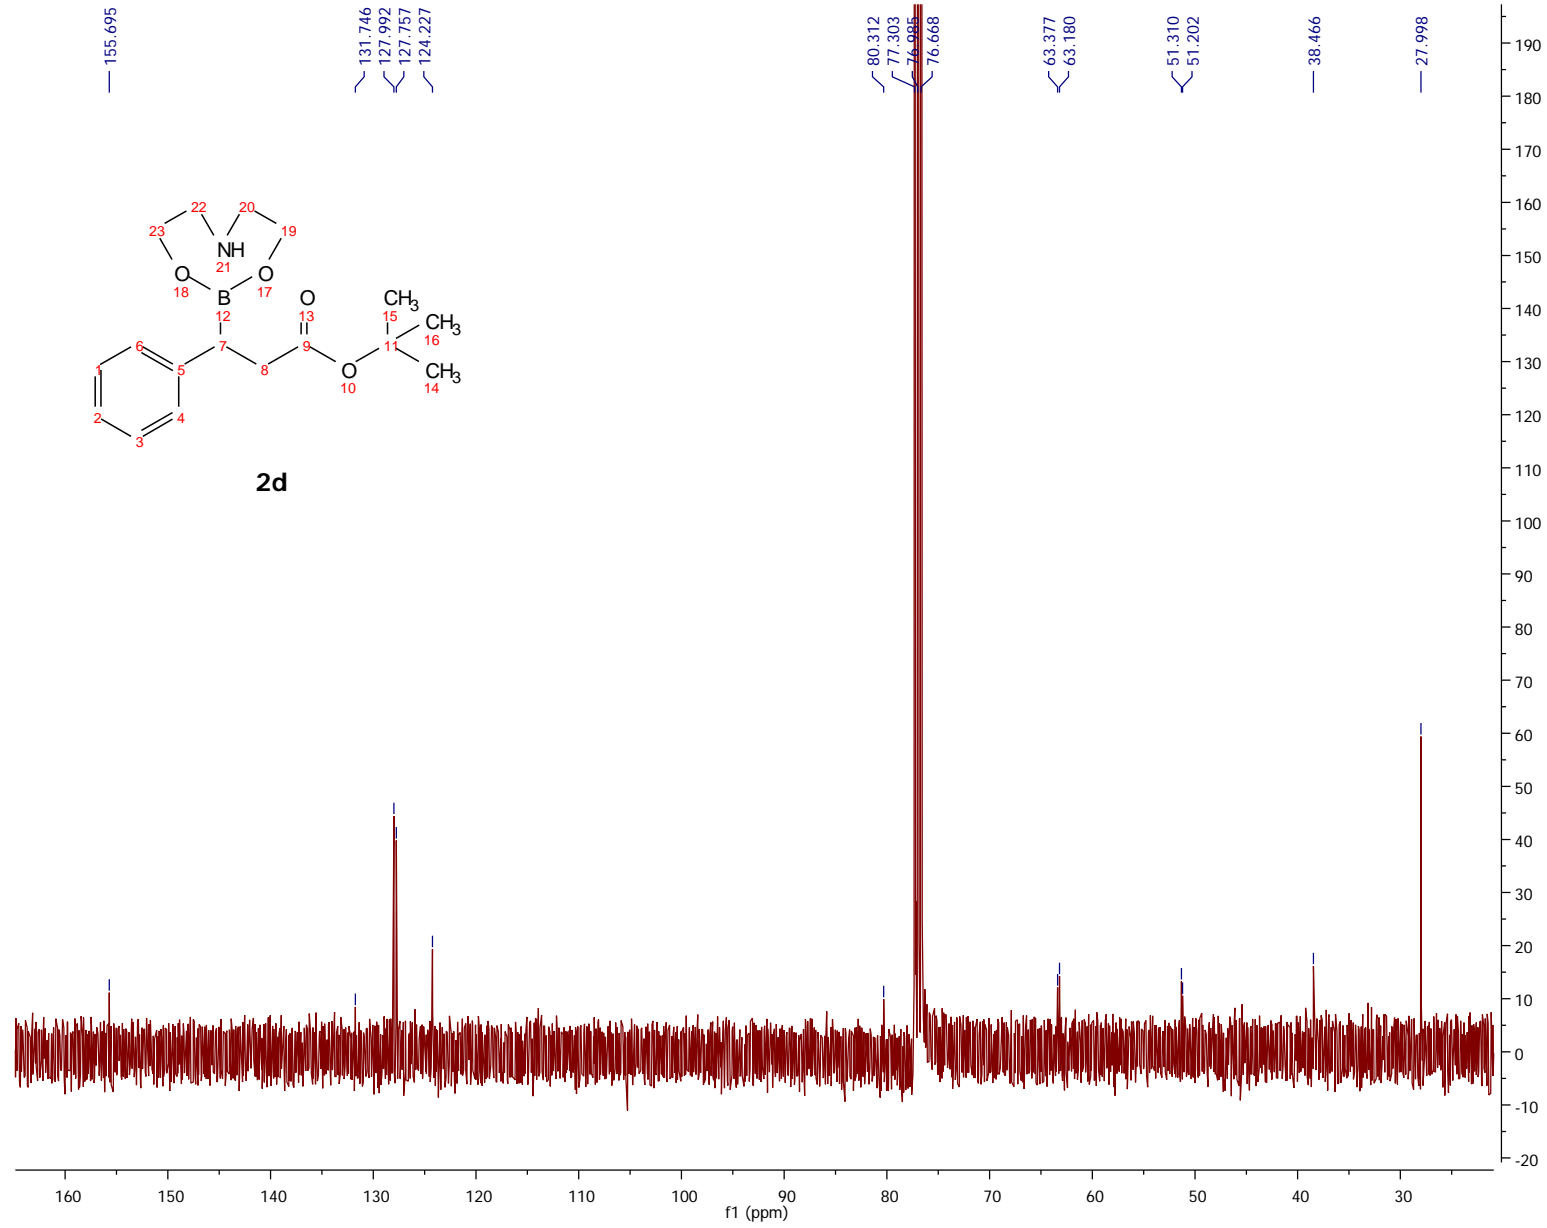

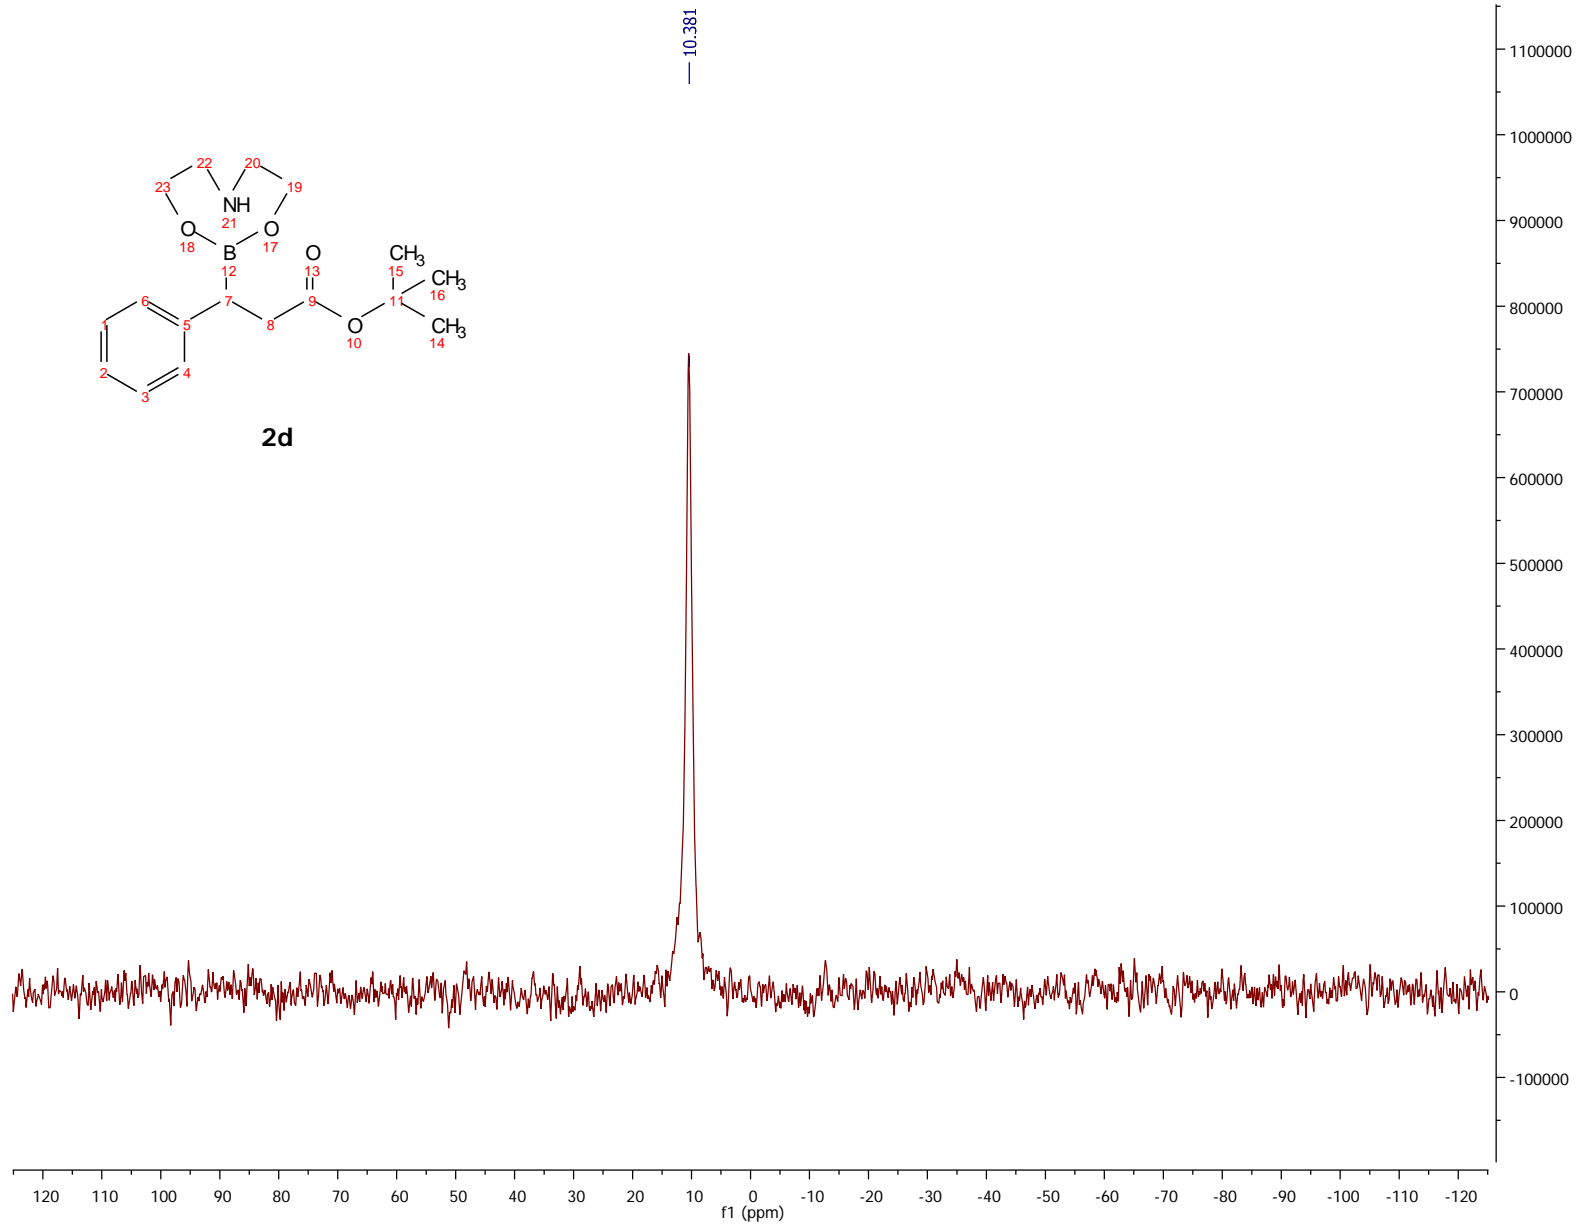

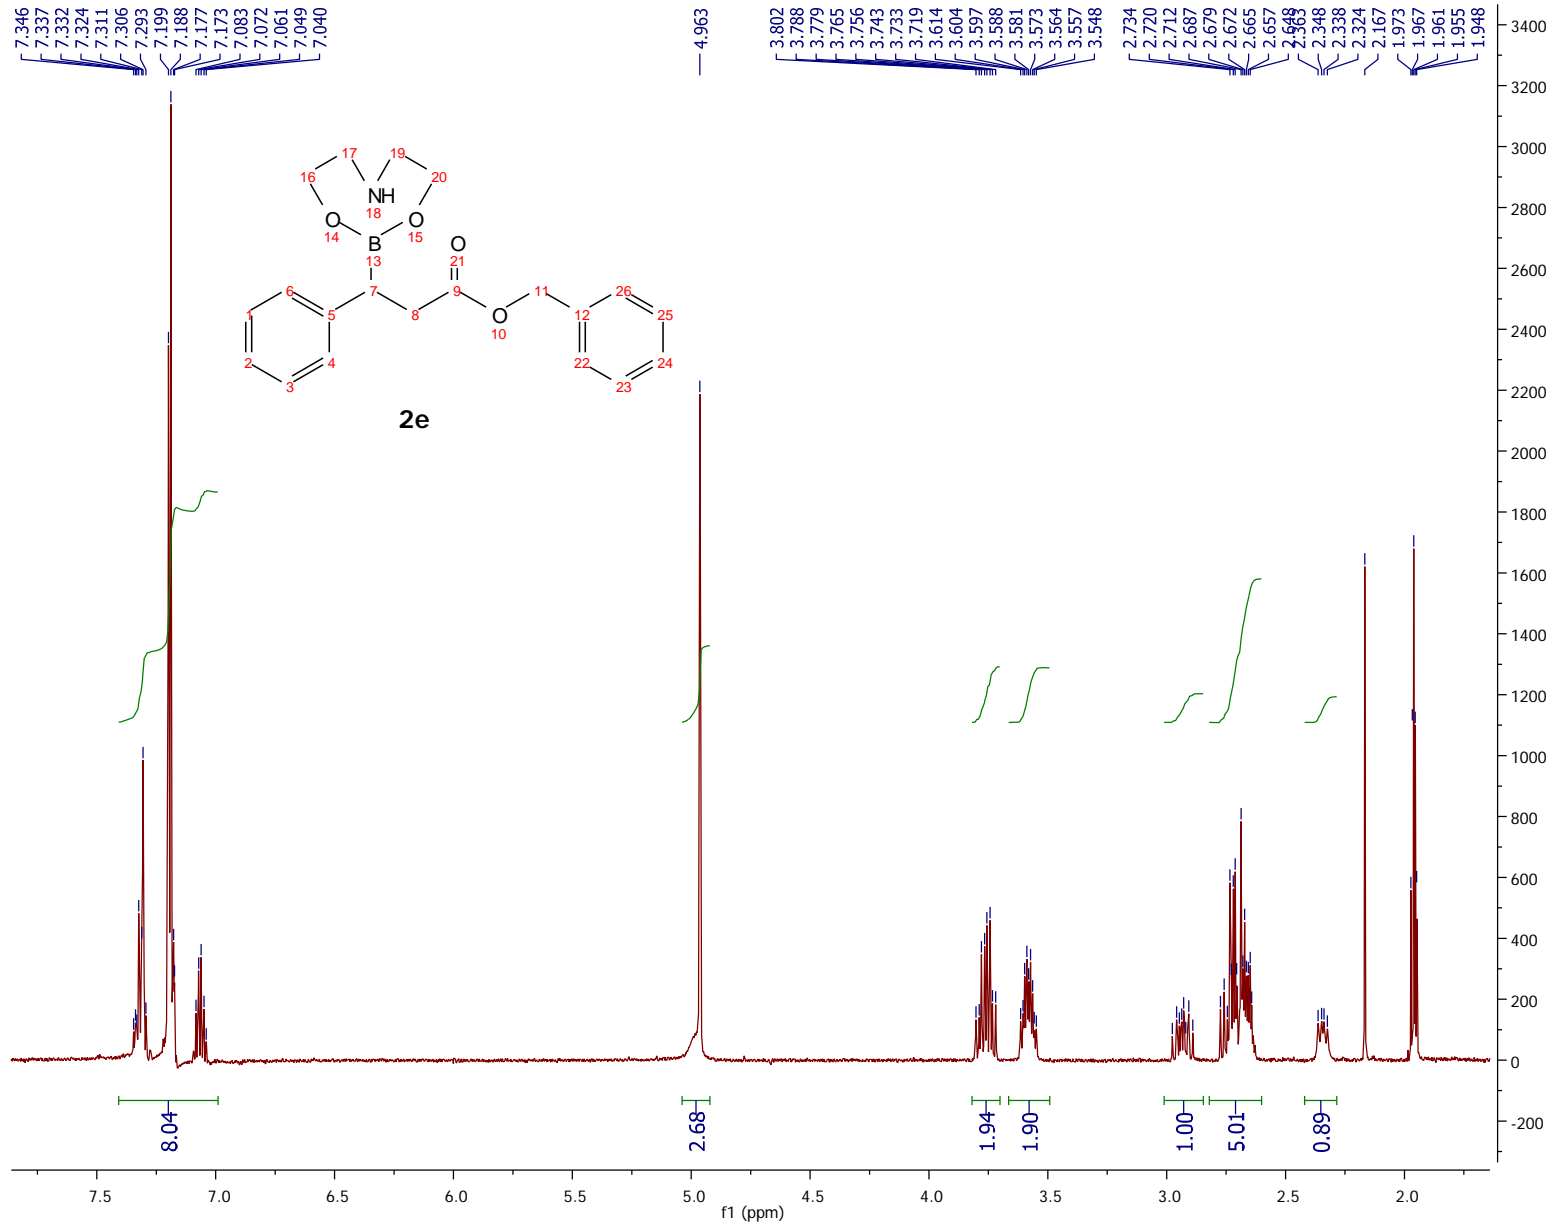

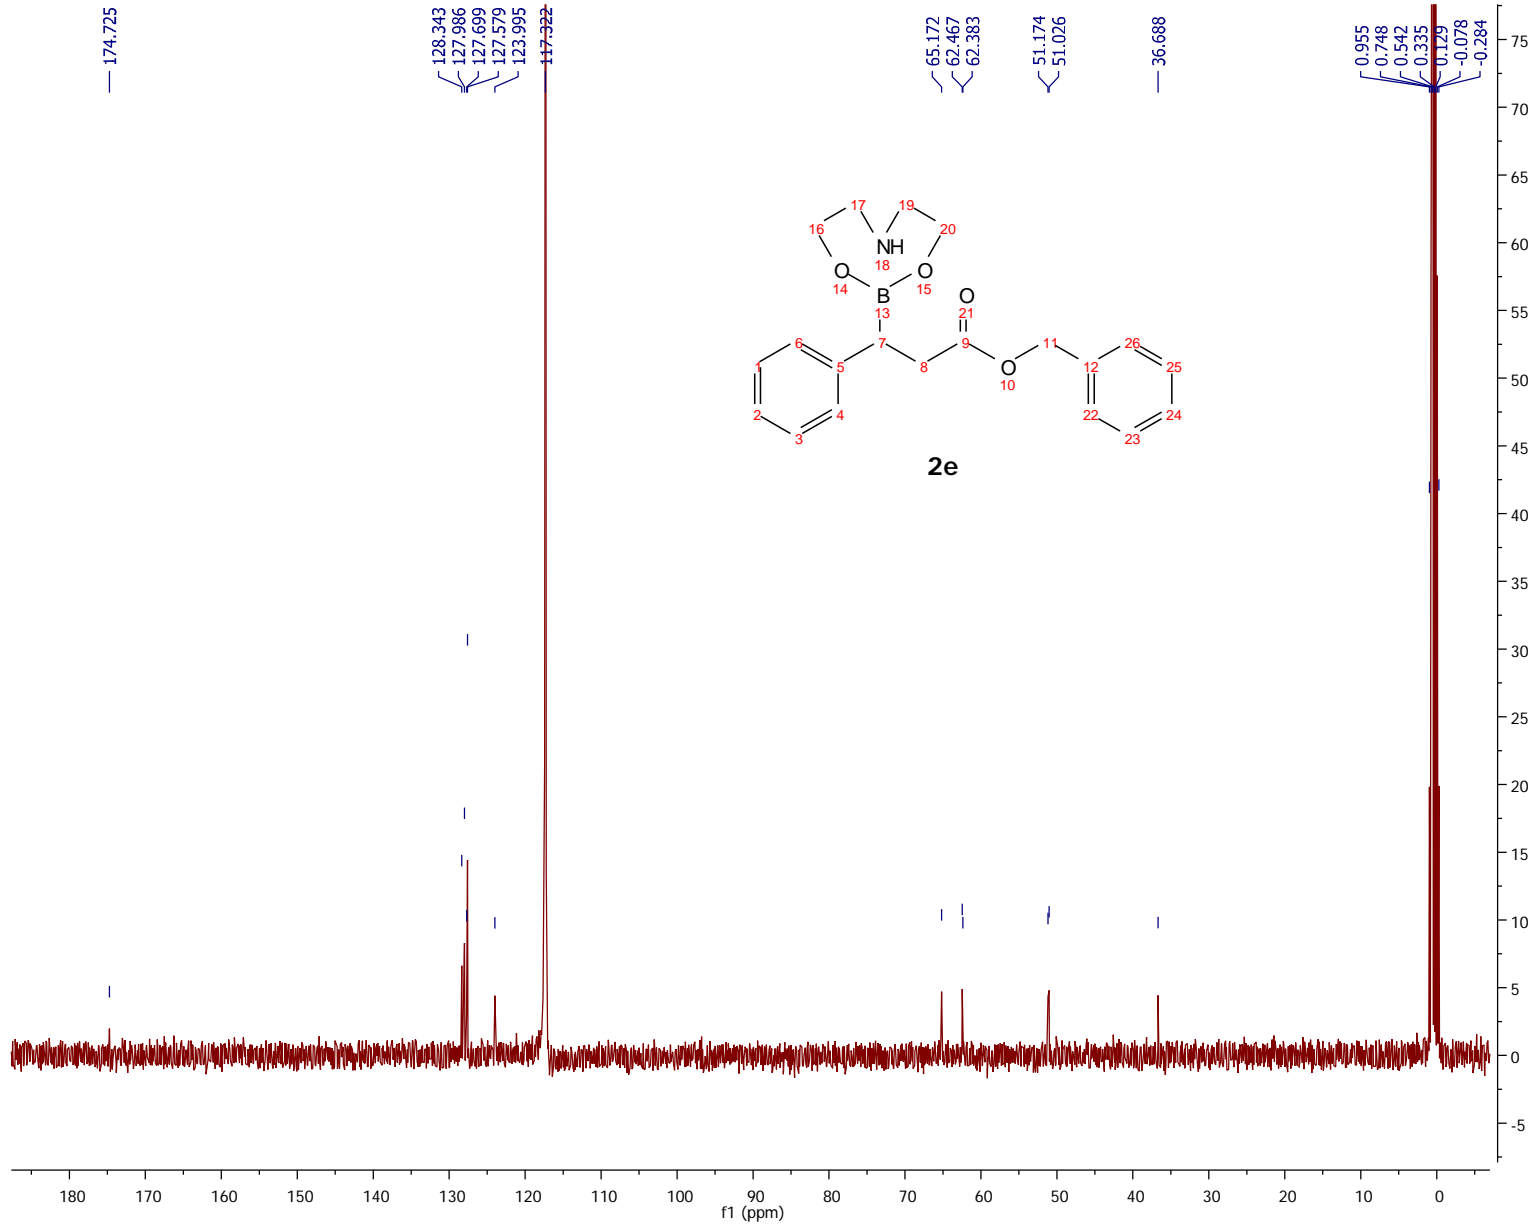



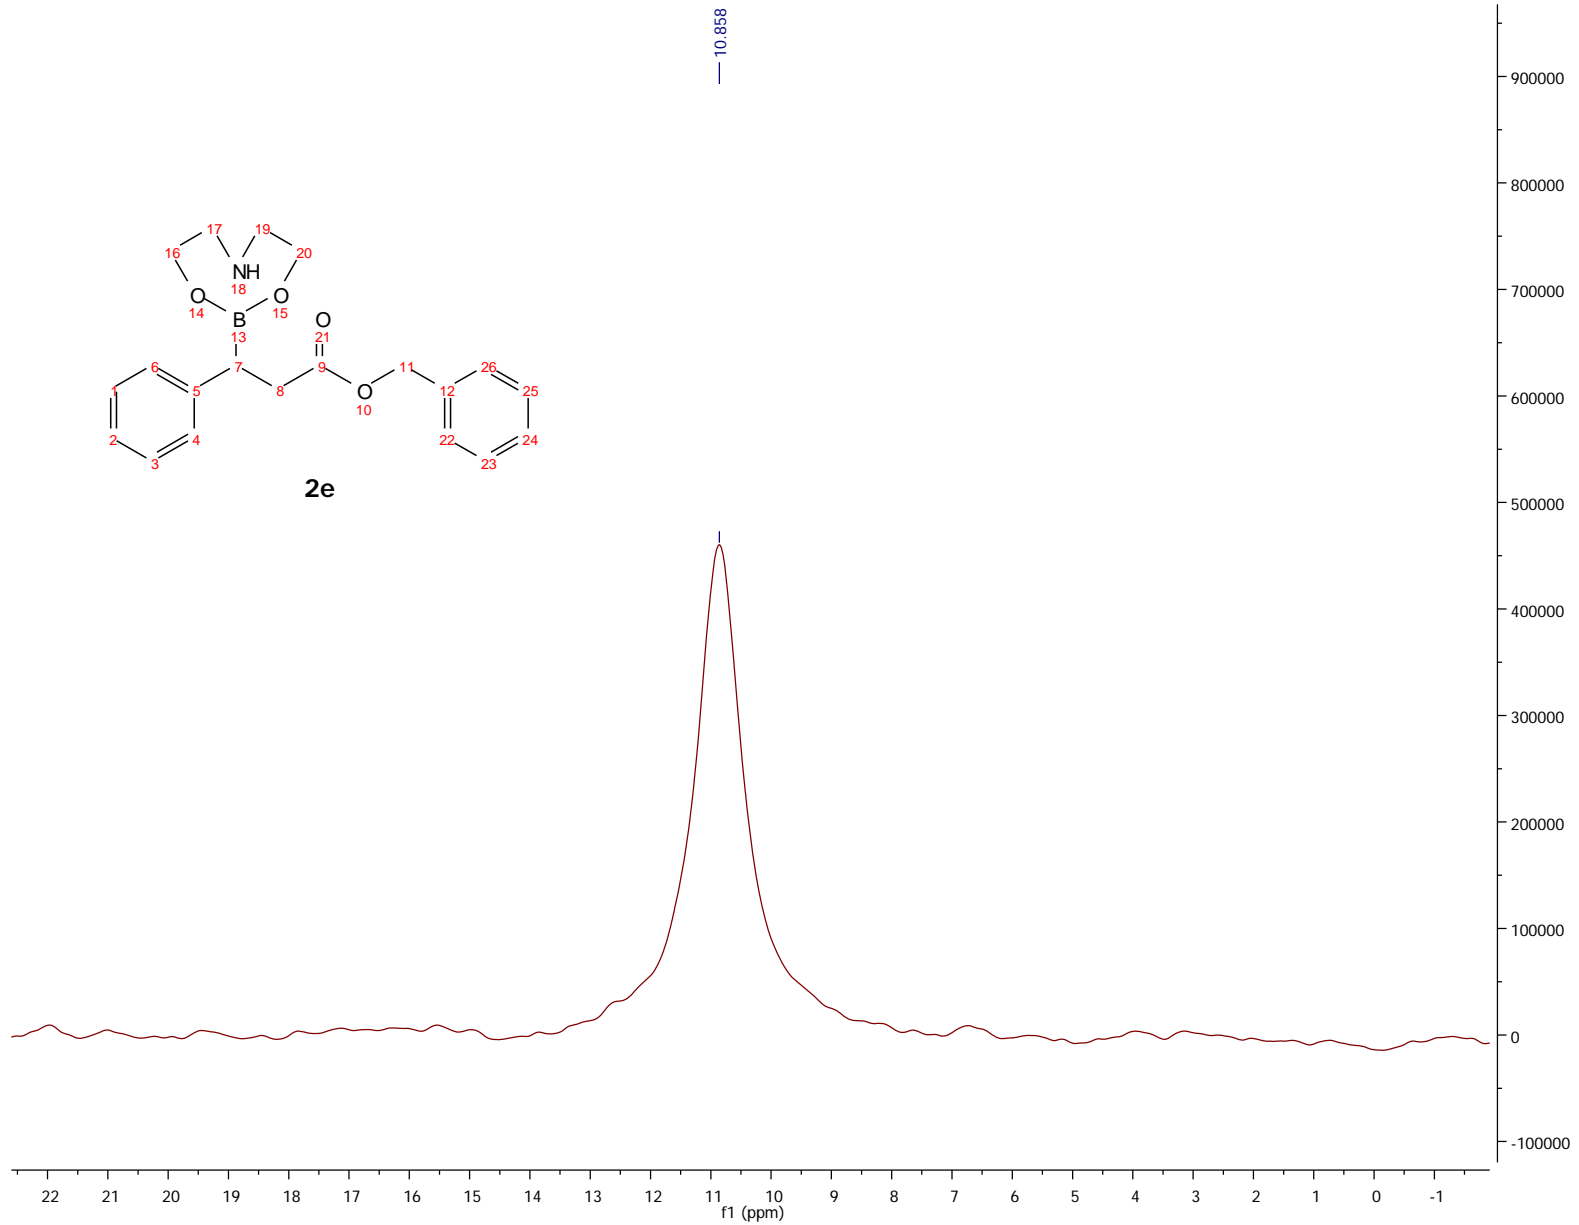

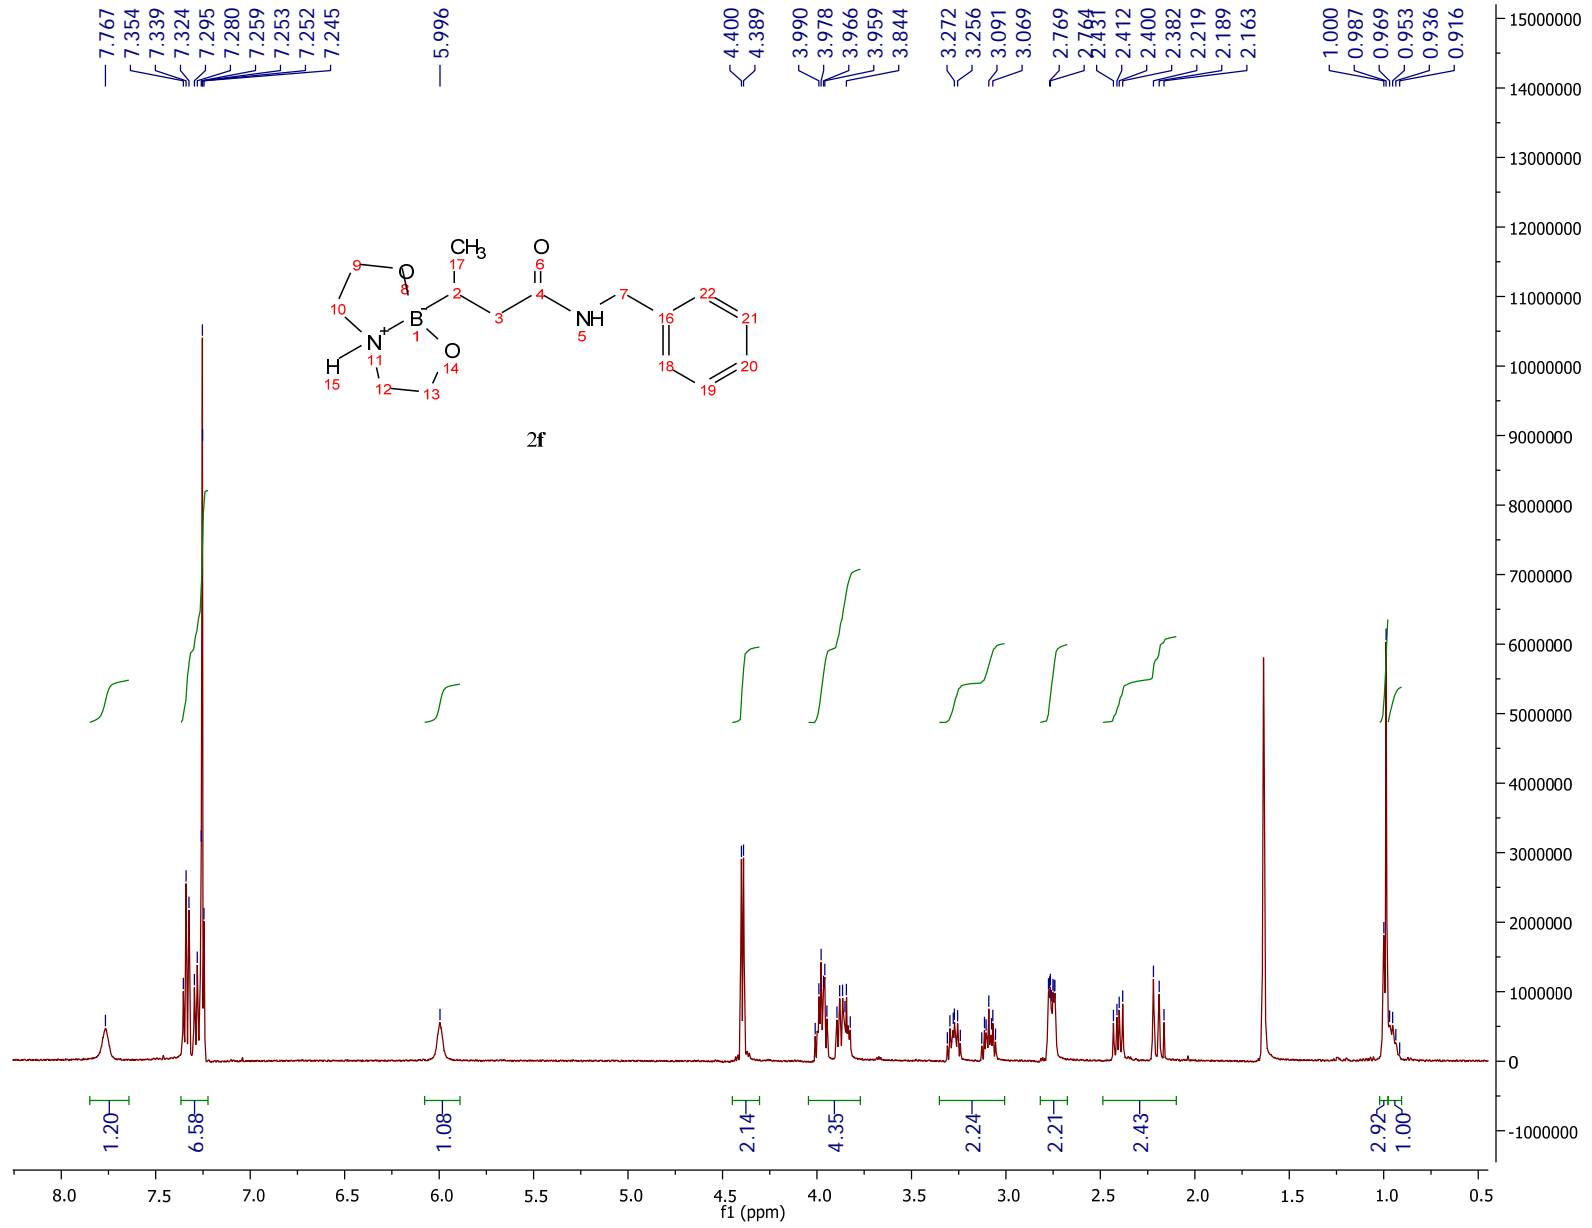

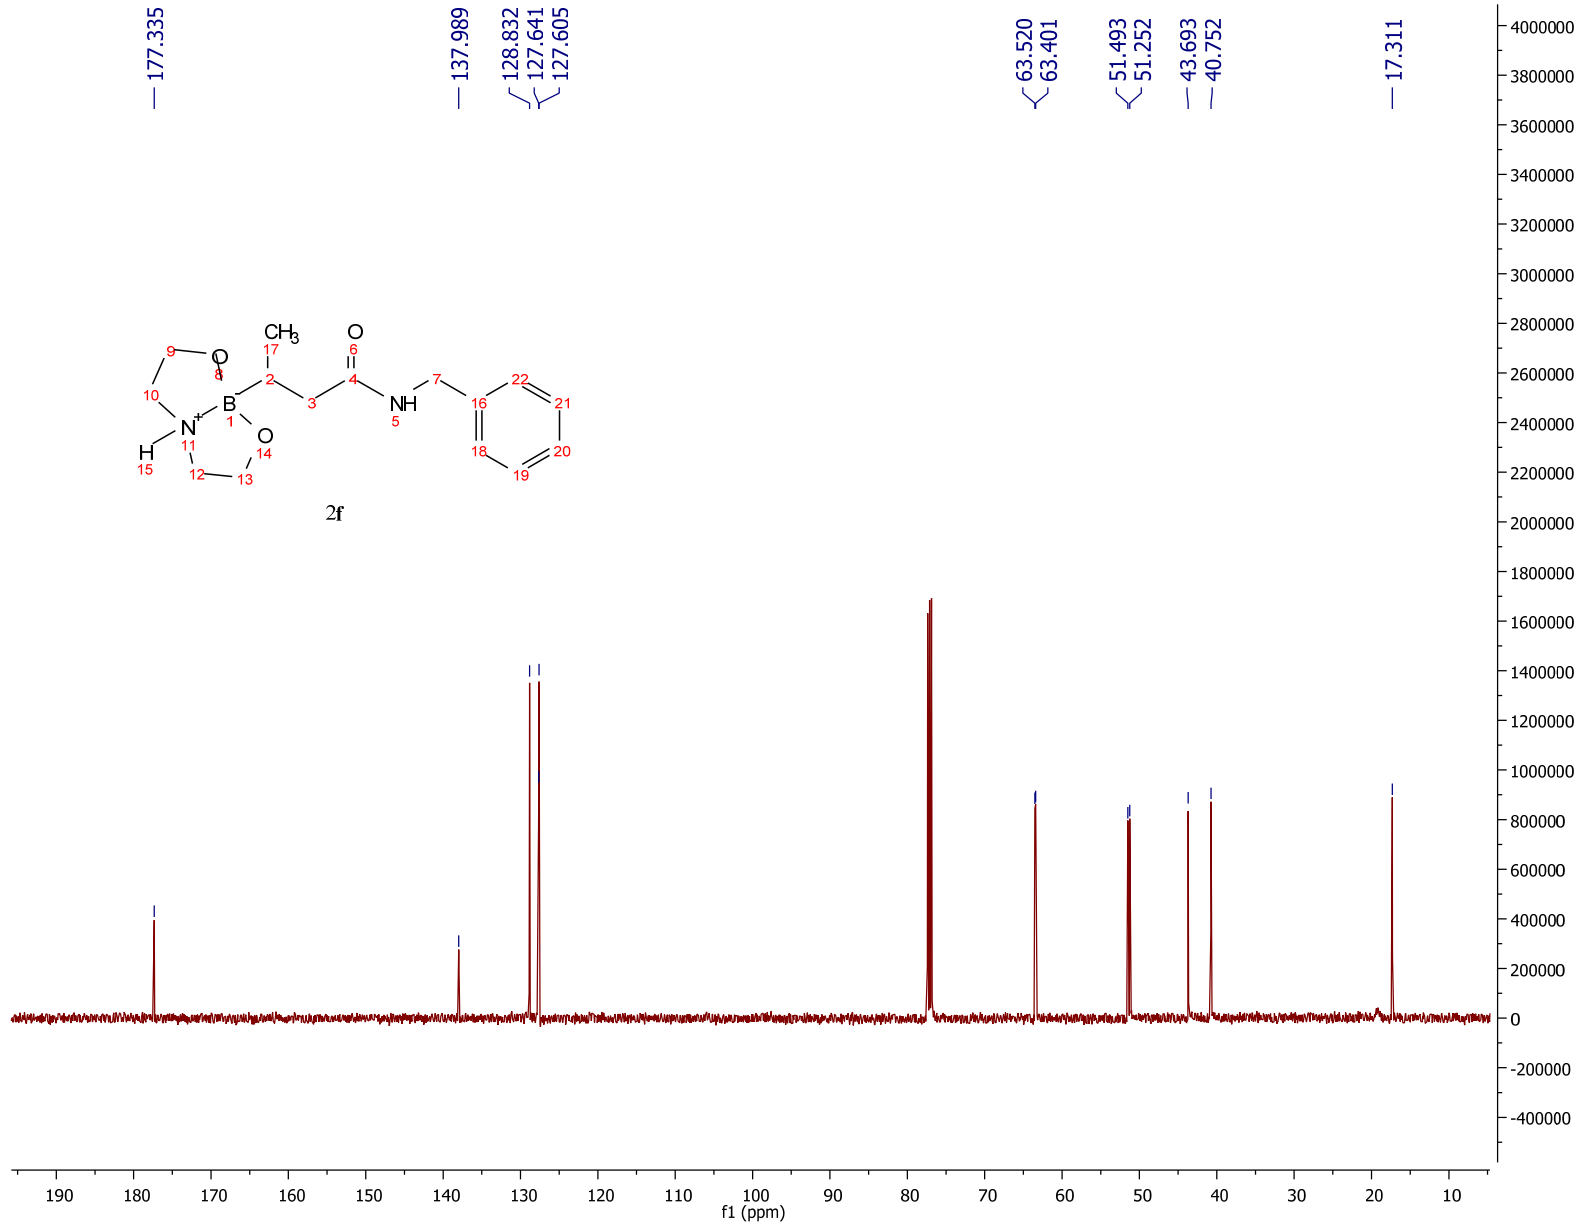

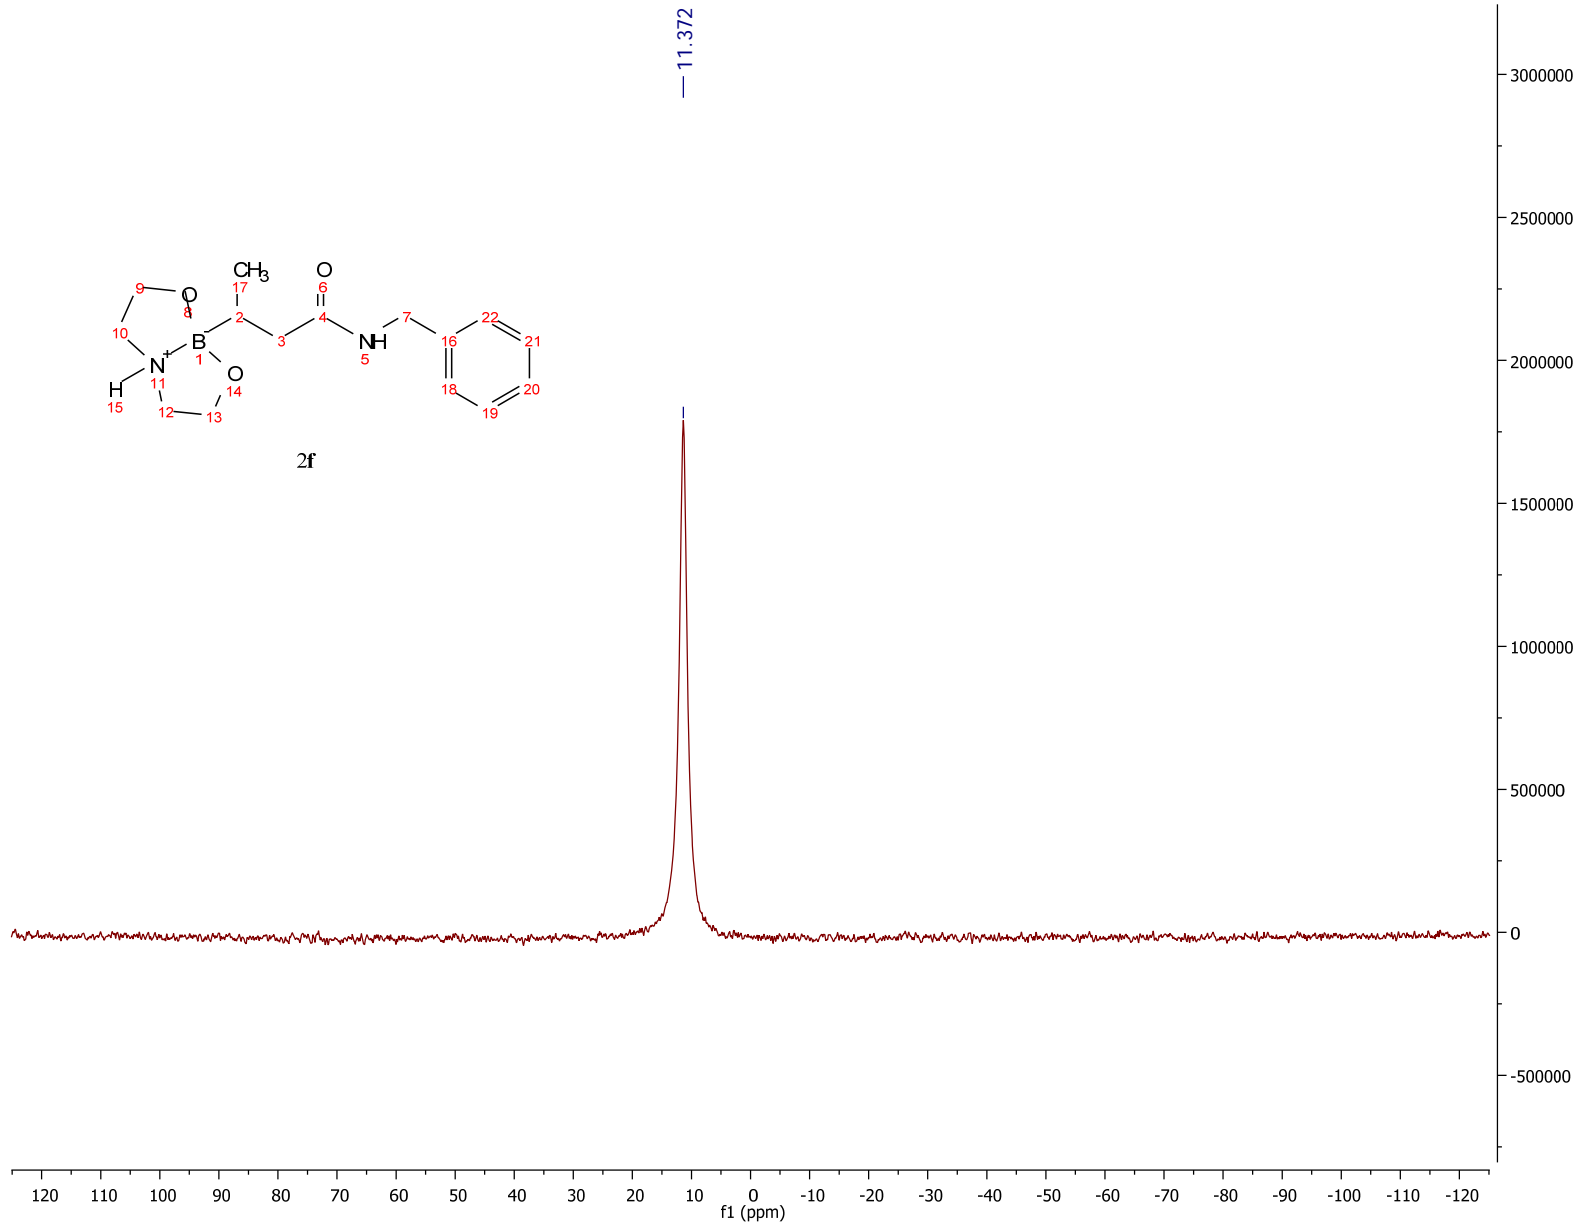

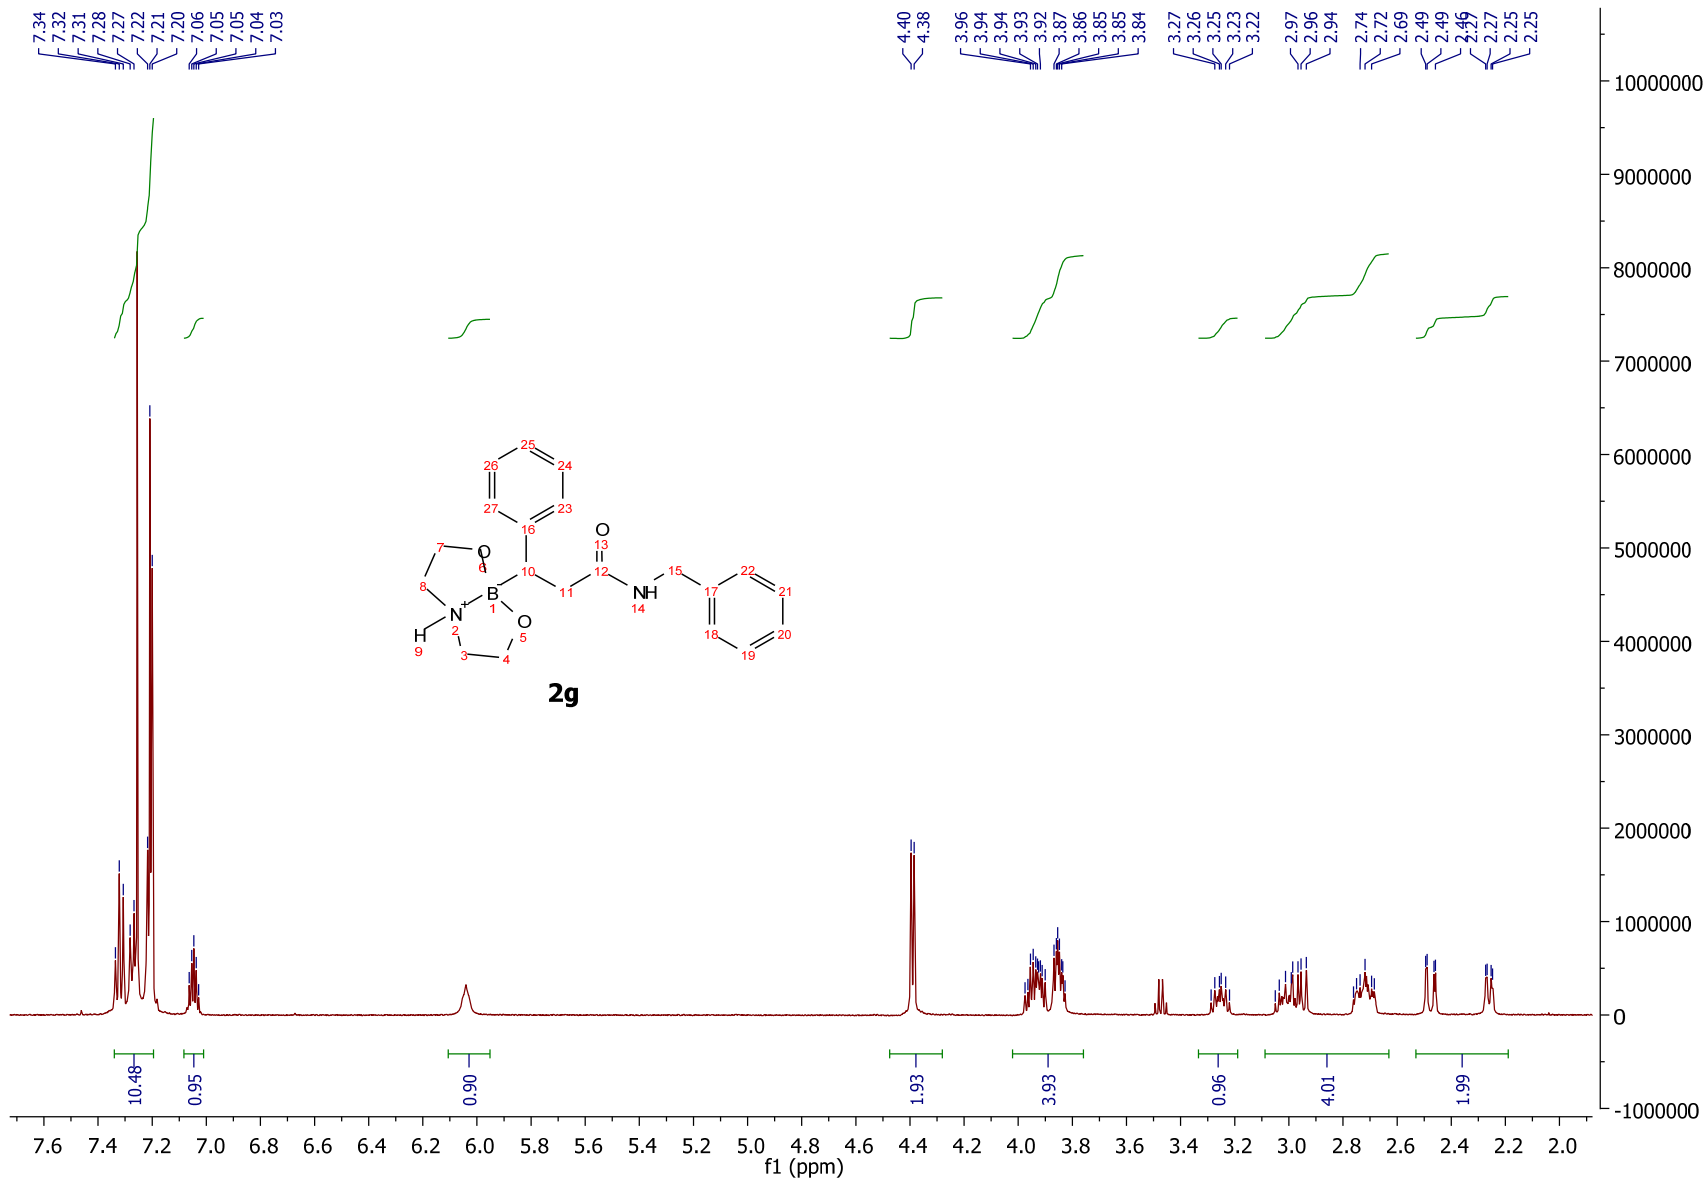

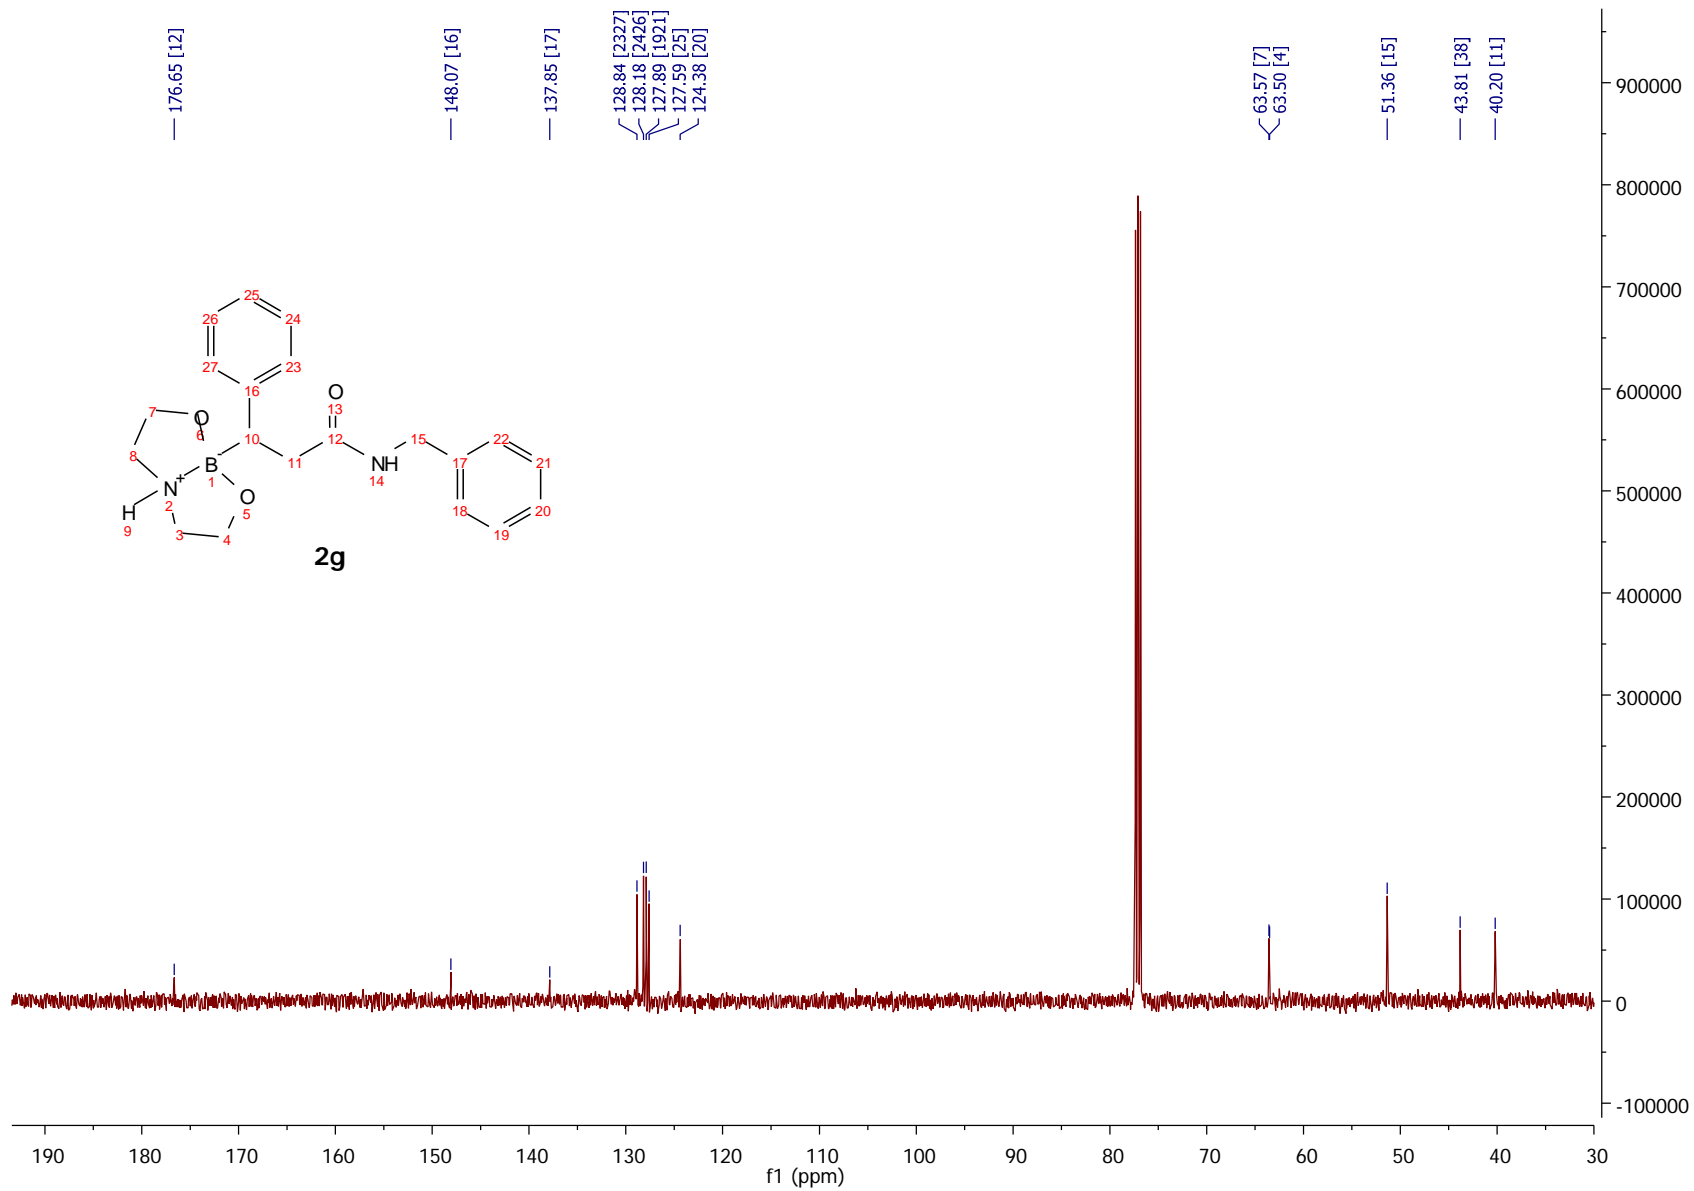

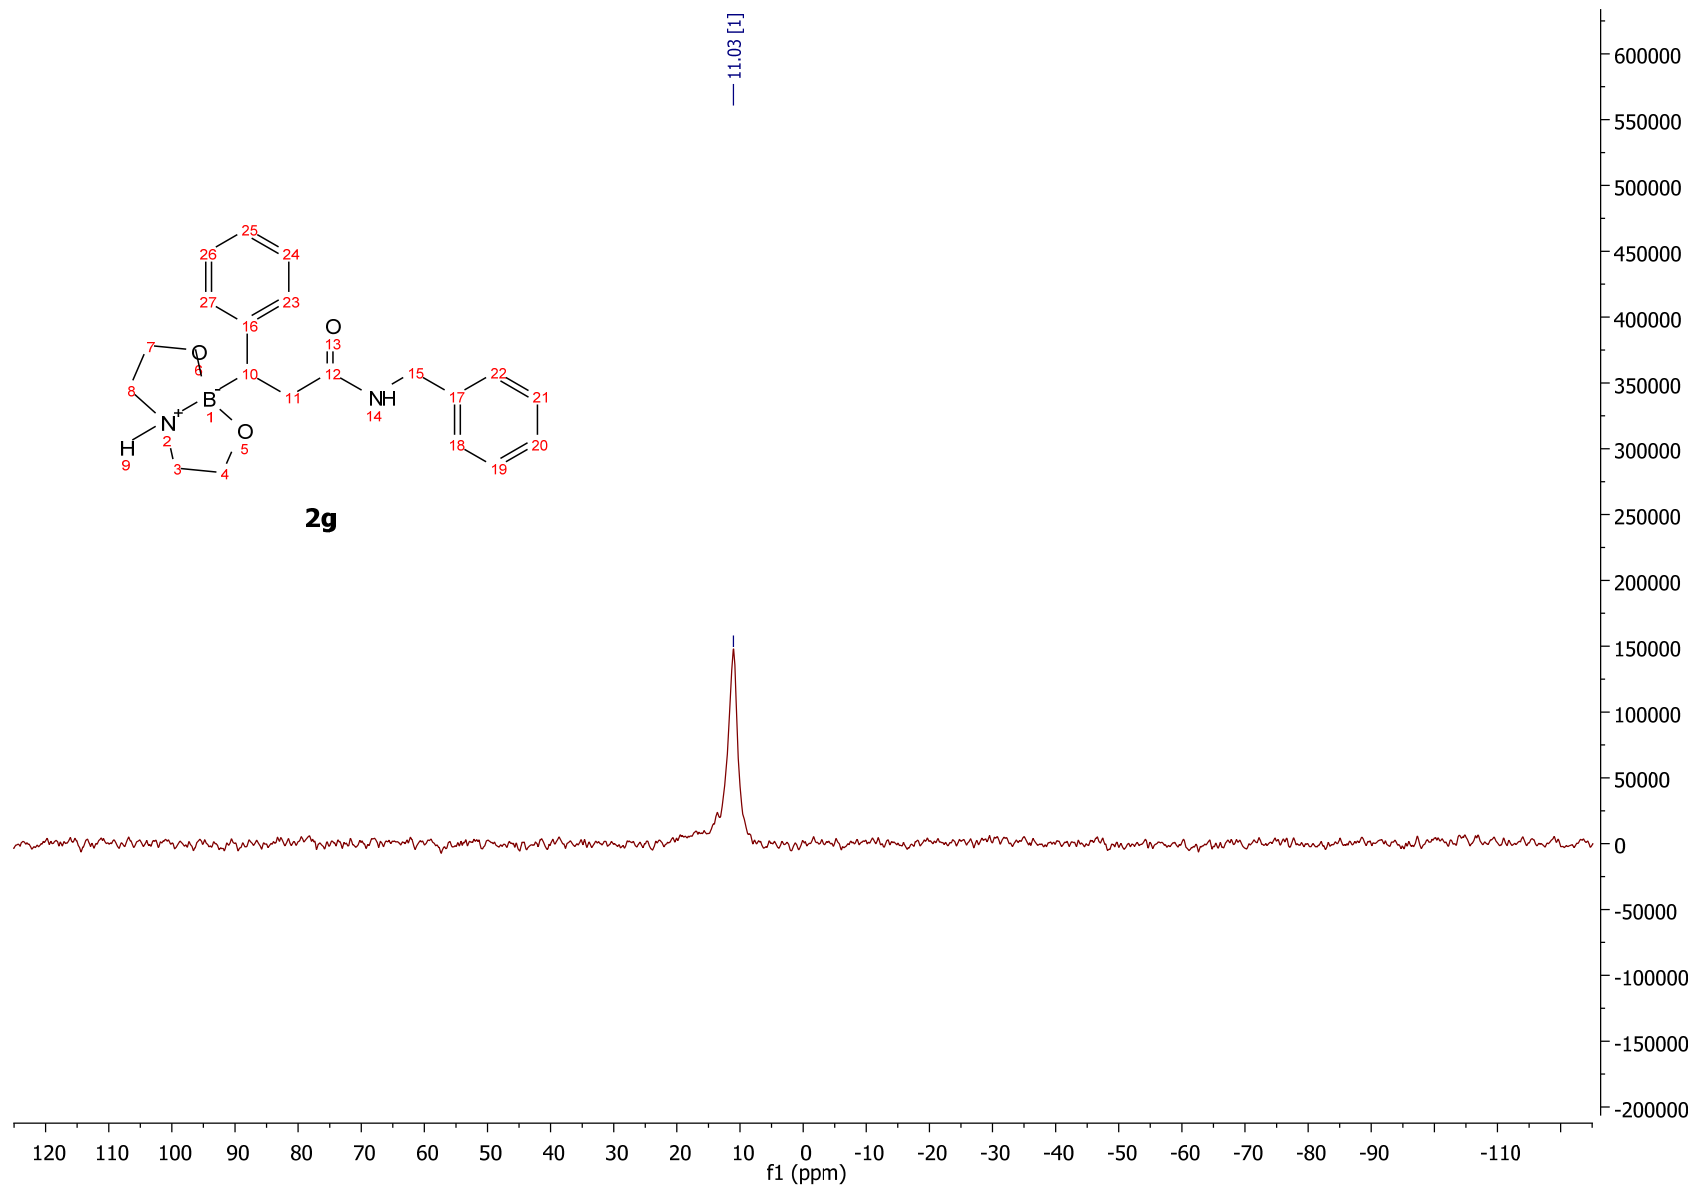

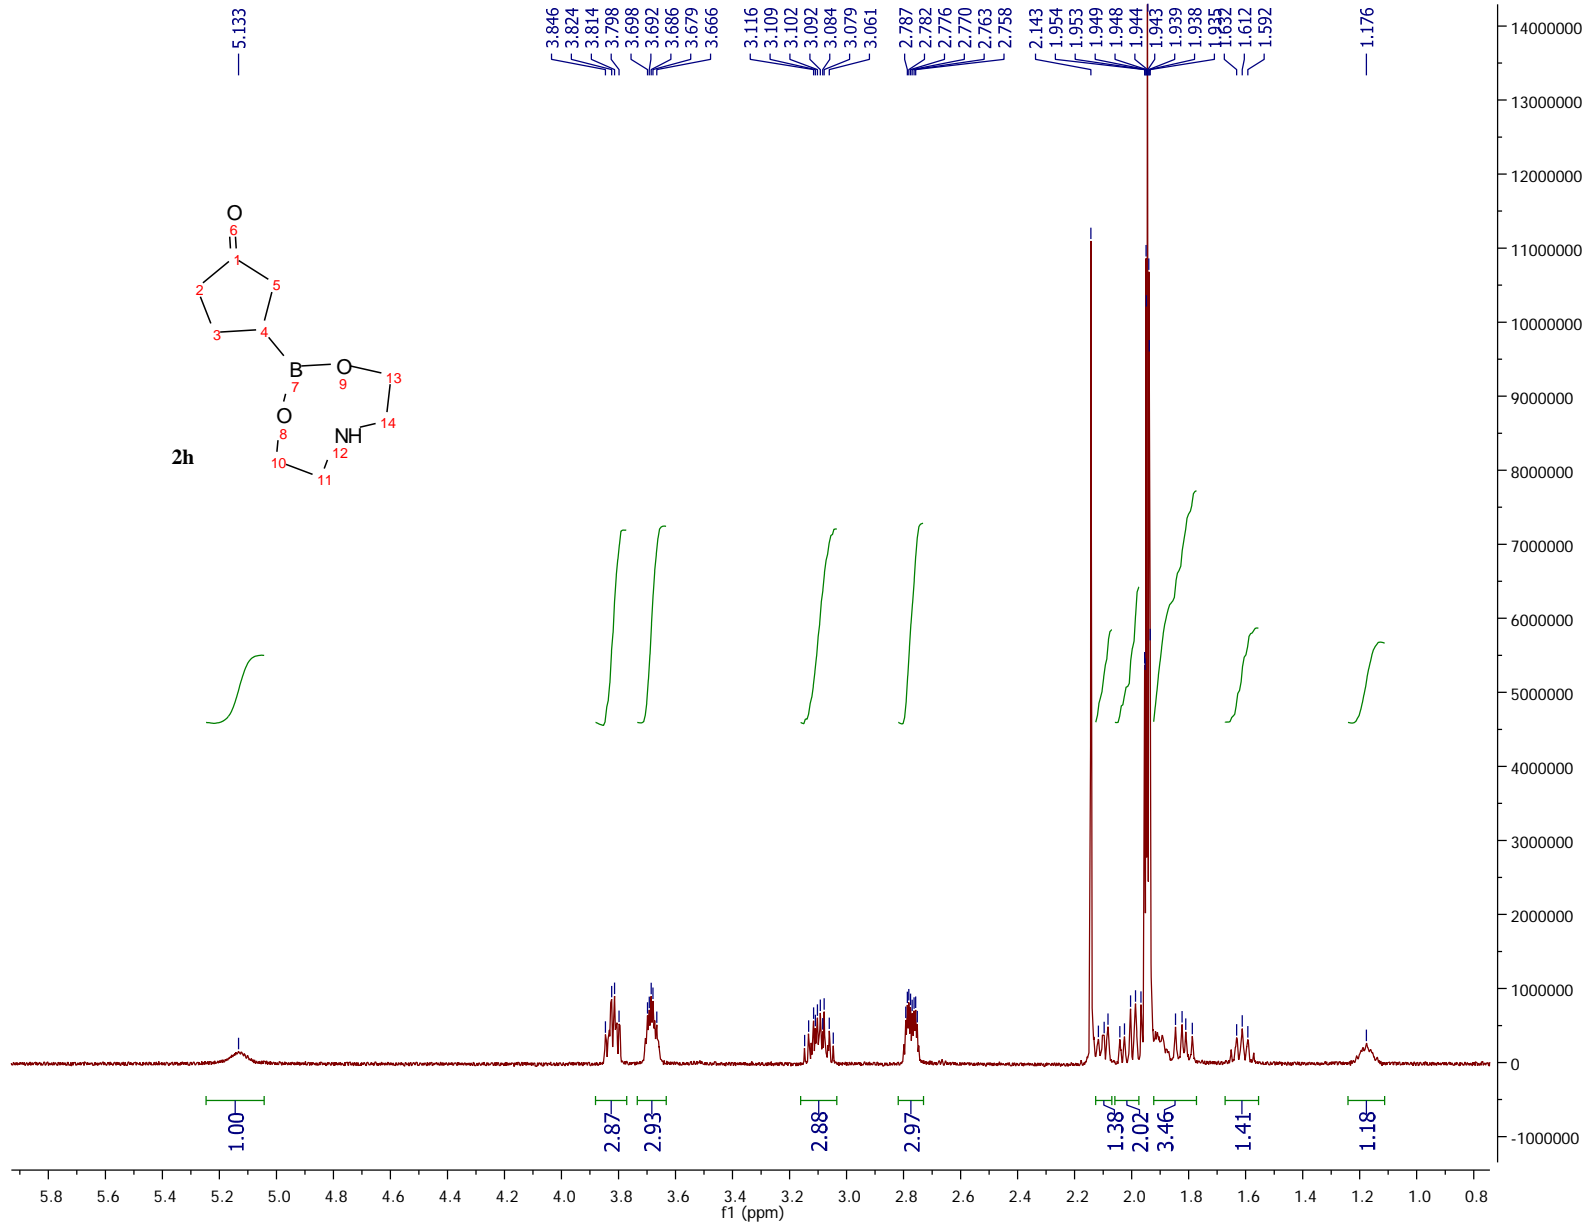



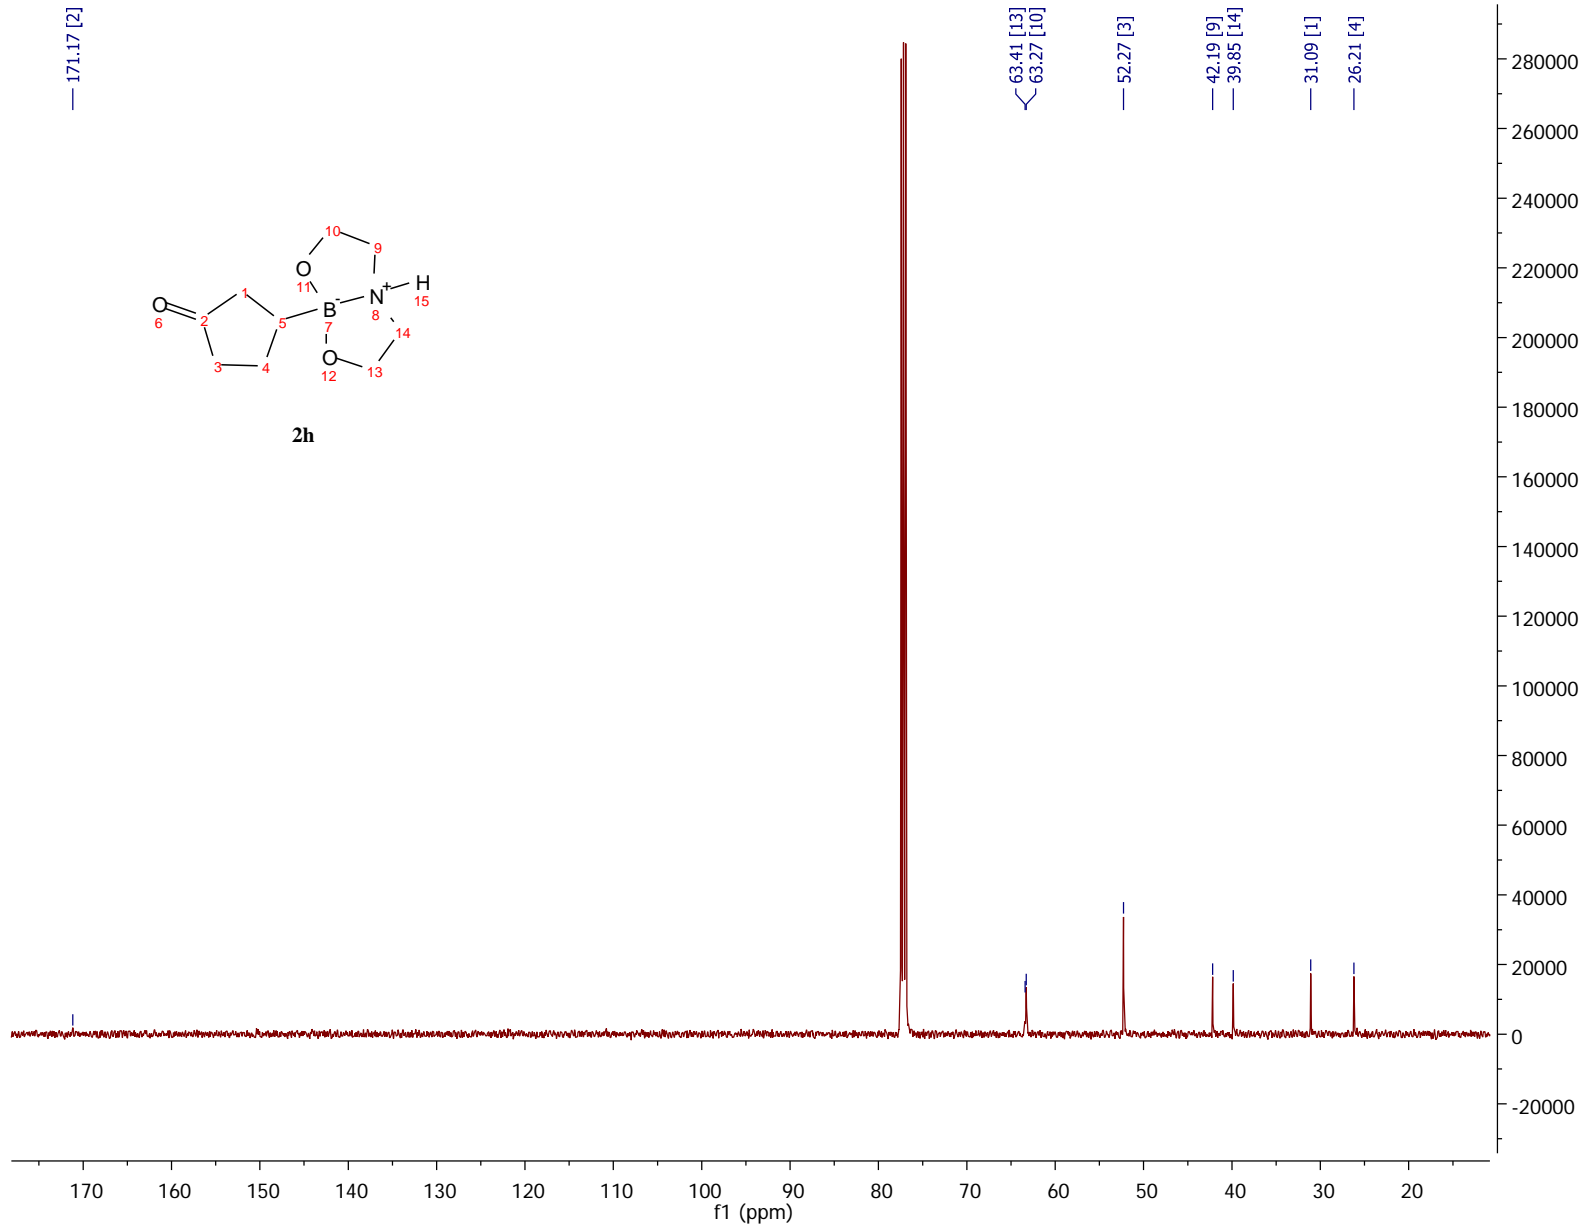

S#424654  
Single Pulse with Broadband Decoupling

— 11.56

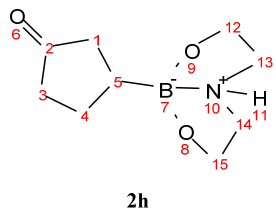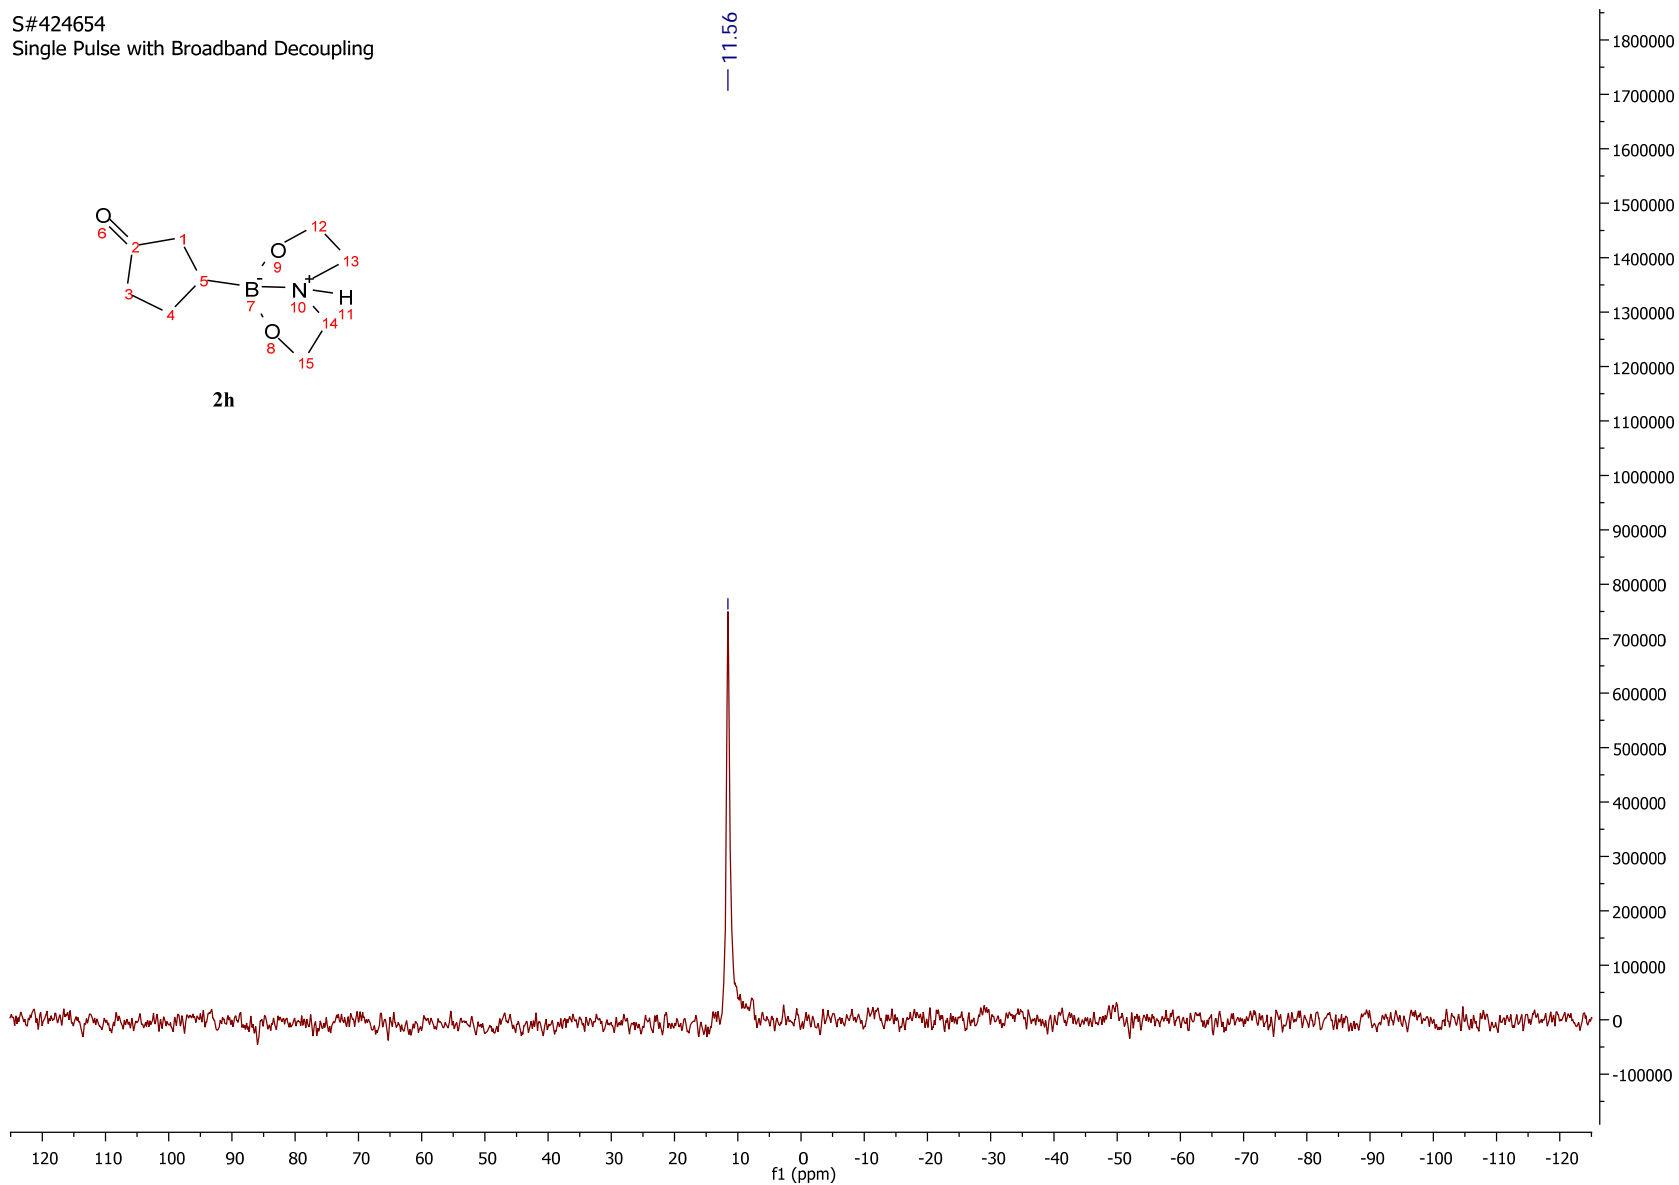

chalcone-diethanolamine-10b

7.85  
7.84  
7.83  
7.82  
7.81  
7.80  
7.79  
7.78  
7.77  
7.76  
7.75  
7.74  
7.73  
7.72  
7.71  
7.70  
7.69  
7.68  
7.67  
7.66  
7.65  
7.64  
7.63  
7.62  
7.61  
7.60  
7.59  
7.58  
7.57  
7.56  
7.55  
7.54  
7.53  
7.52  
7.51  
7.50  
7.49  
7.48  
7.47  
7.46  
7.45  
7.44  
7.43  
7.42  
7.41  
7.40  
7.39  
7.38  
7.37  
7.36  
7.35  
7.34  
7.33  
7.32  
7.31  
7.30  
7.29  
7.28  
7.27  
7.26  
7.25  
7.24  
7.23  
7.22  
7.21  
7.20  
7.19  
7.18  
7.17  
7.16  
7.15  
7.14  
7.13  
7.12  
7.11  
7.10  
7.09  
7.08  
7.07  
7.06  
7.05  
7.04  
7.03  
7.02  
7.01  
7.00  
6.99

3.82  
3.81  
3.80  
3.79  
3.78  
3.77  
3.76  
3.74  
3.61  
3.43  
3.42  
3.39  
3.38  
3.35  
3.33  
3.31

2.99  
2.97  
2.96  
2.94  
2.82  
2.82  
2.79  
2.72  
2.71  
2.70  
2.52  
2.50

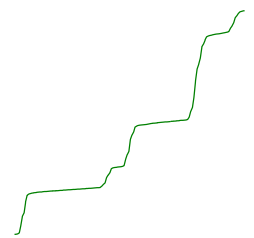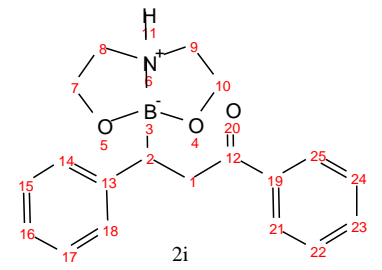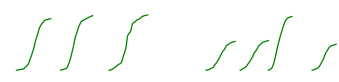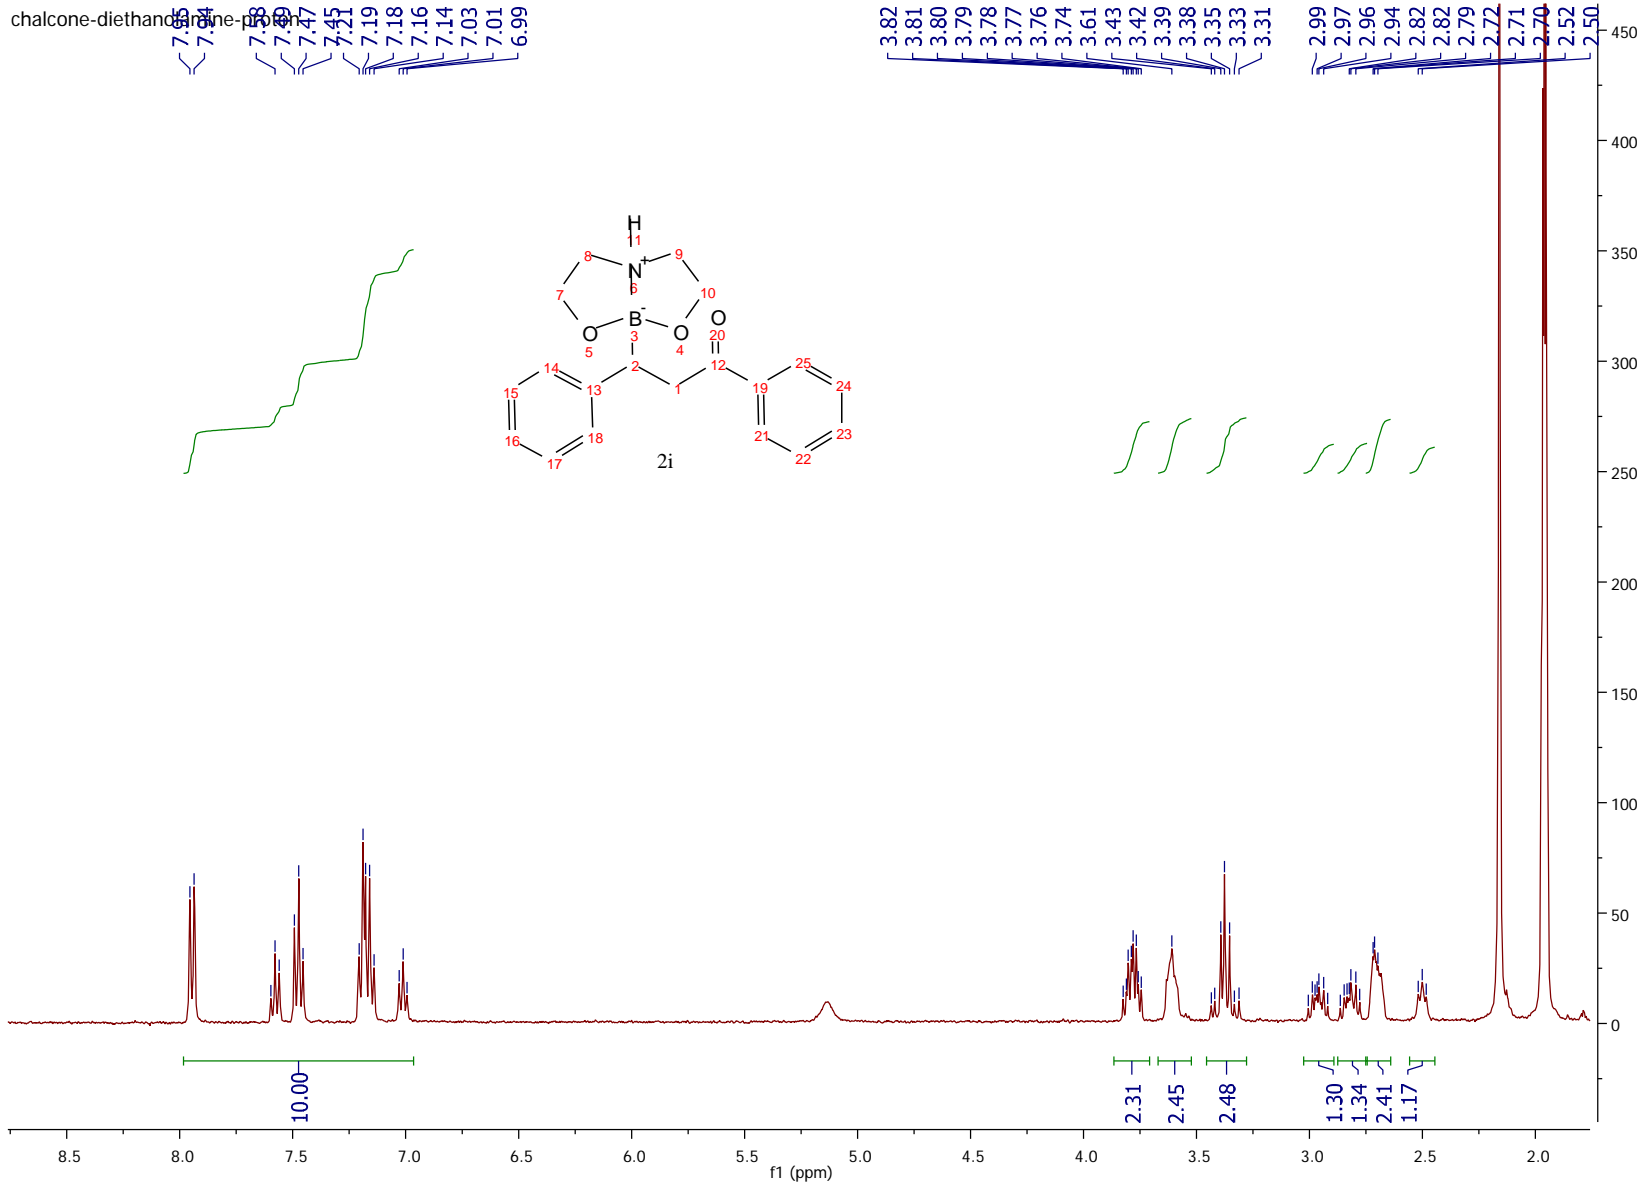

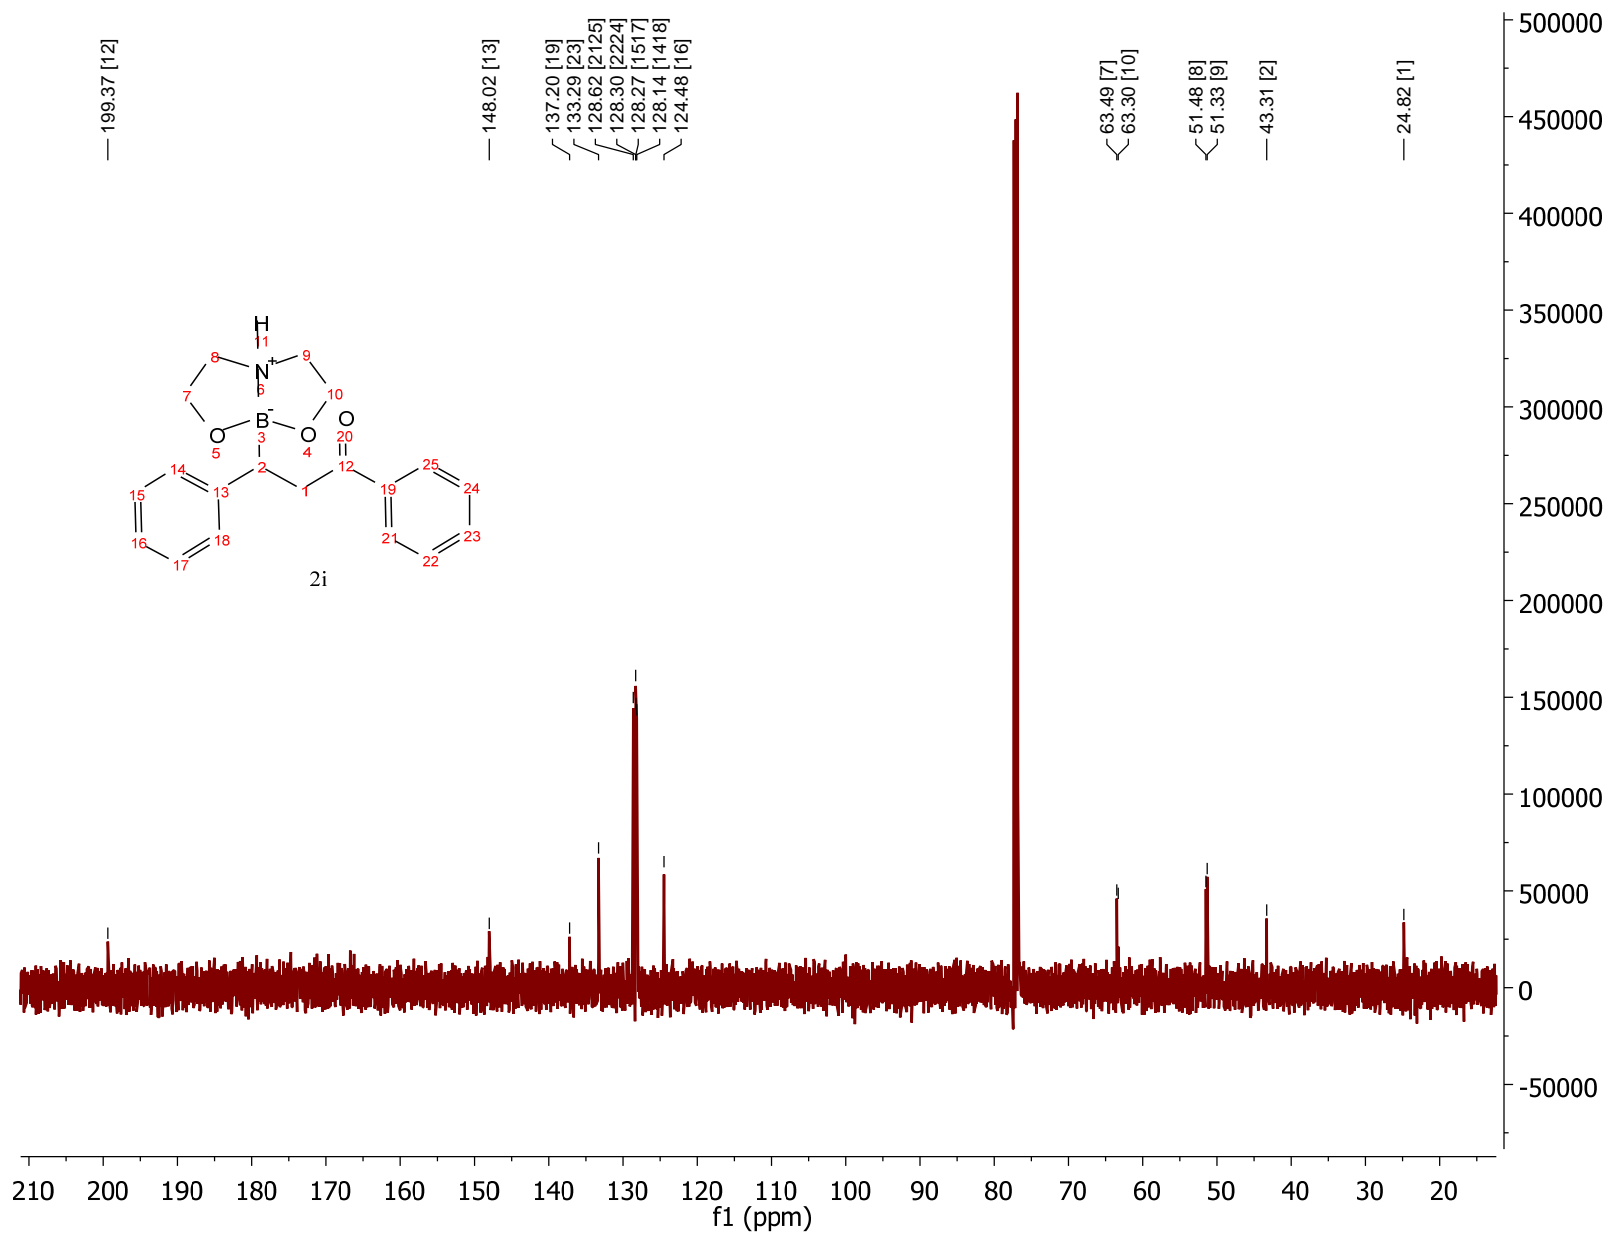

S#433639  
Single Pulse with Broadband Decoupling

— 11.32

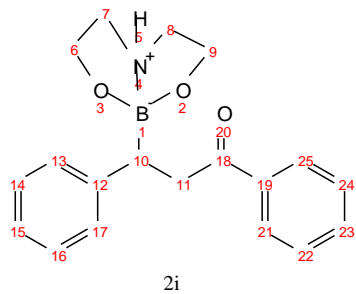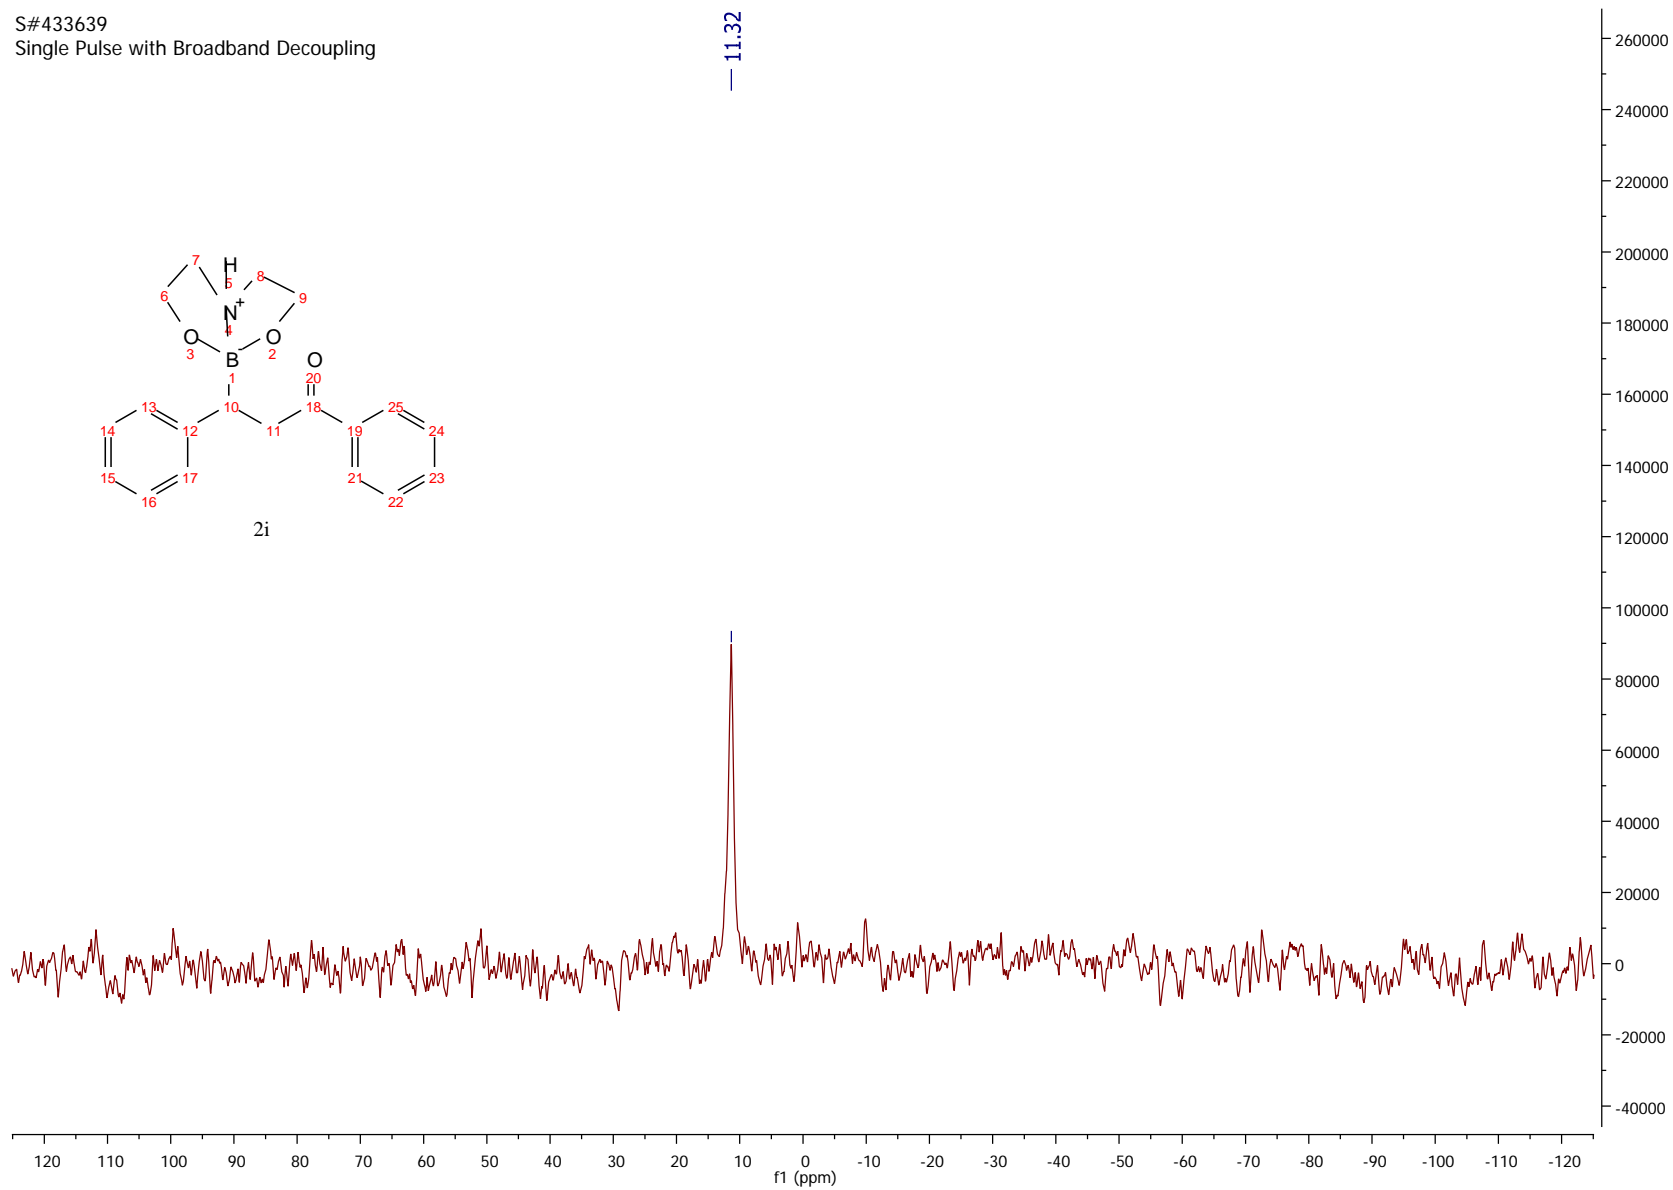

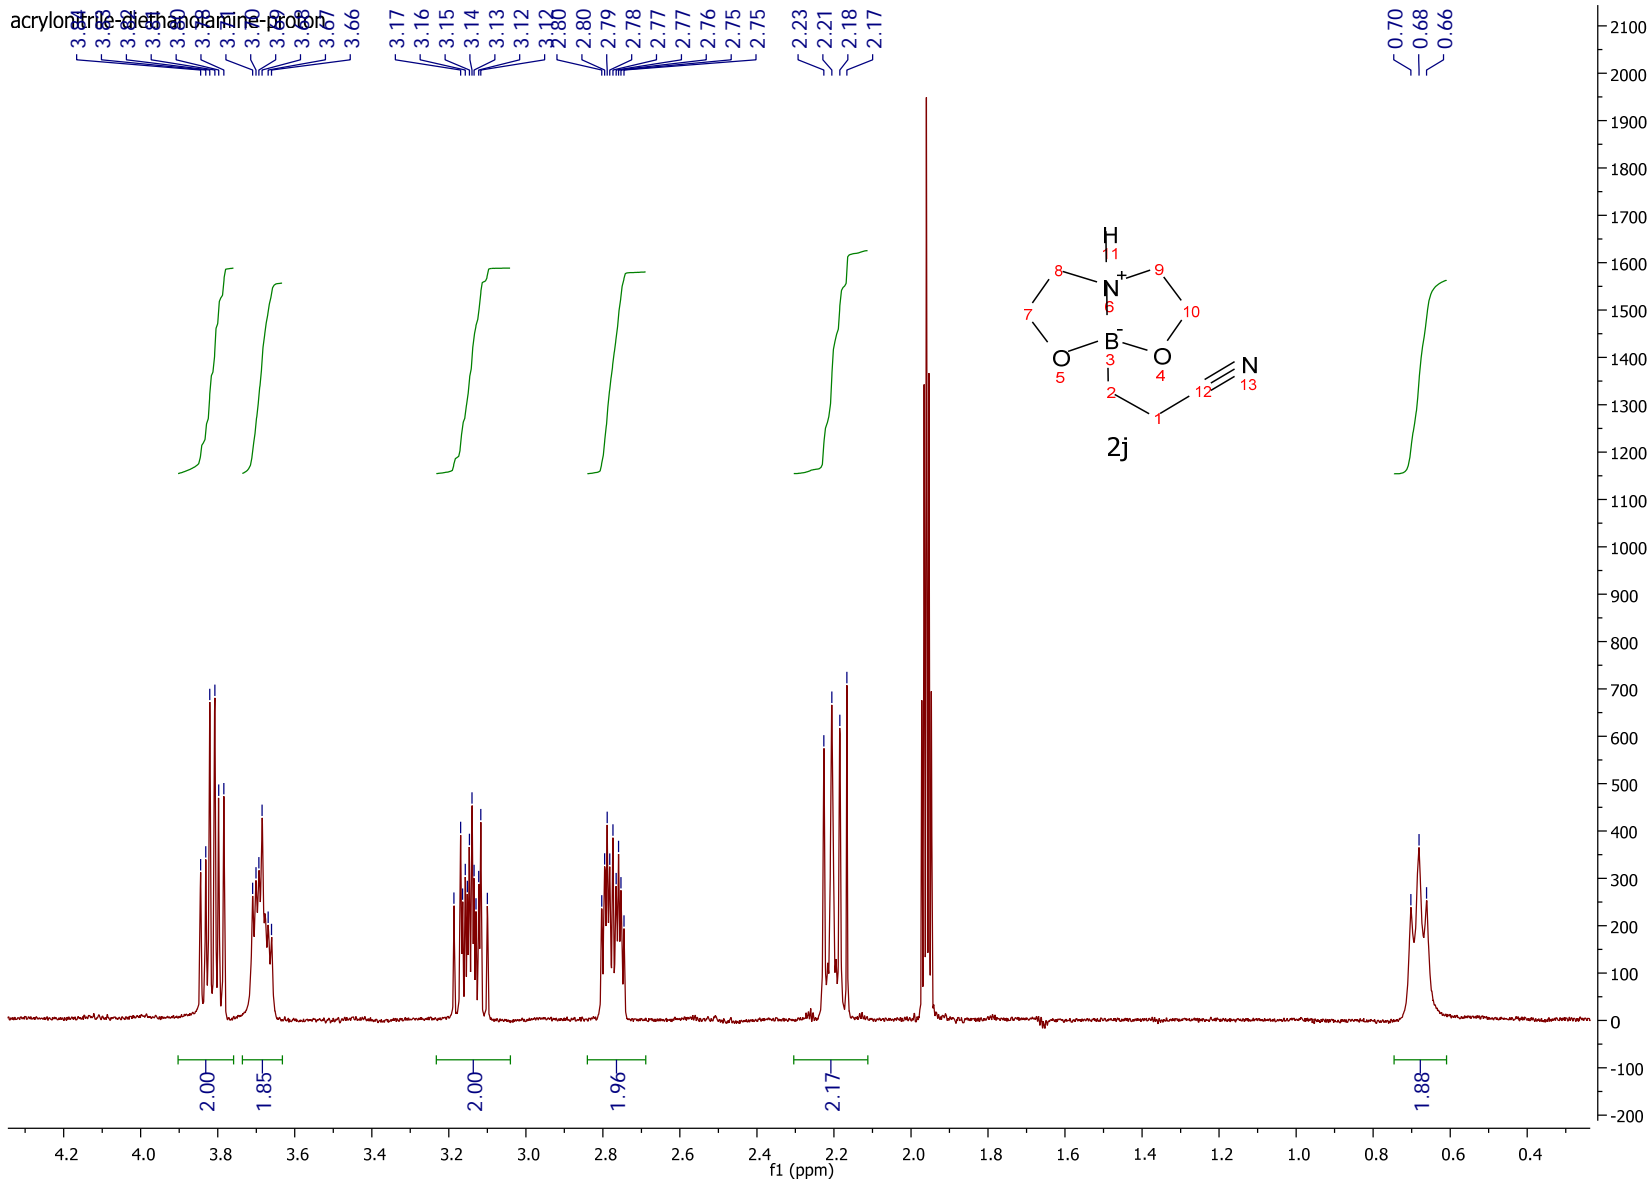

acrylonitrile-diethanolamine-carbon

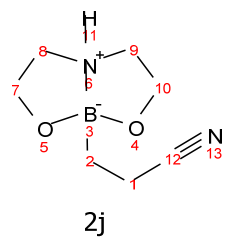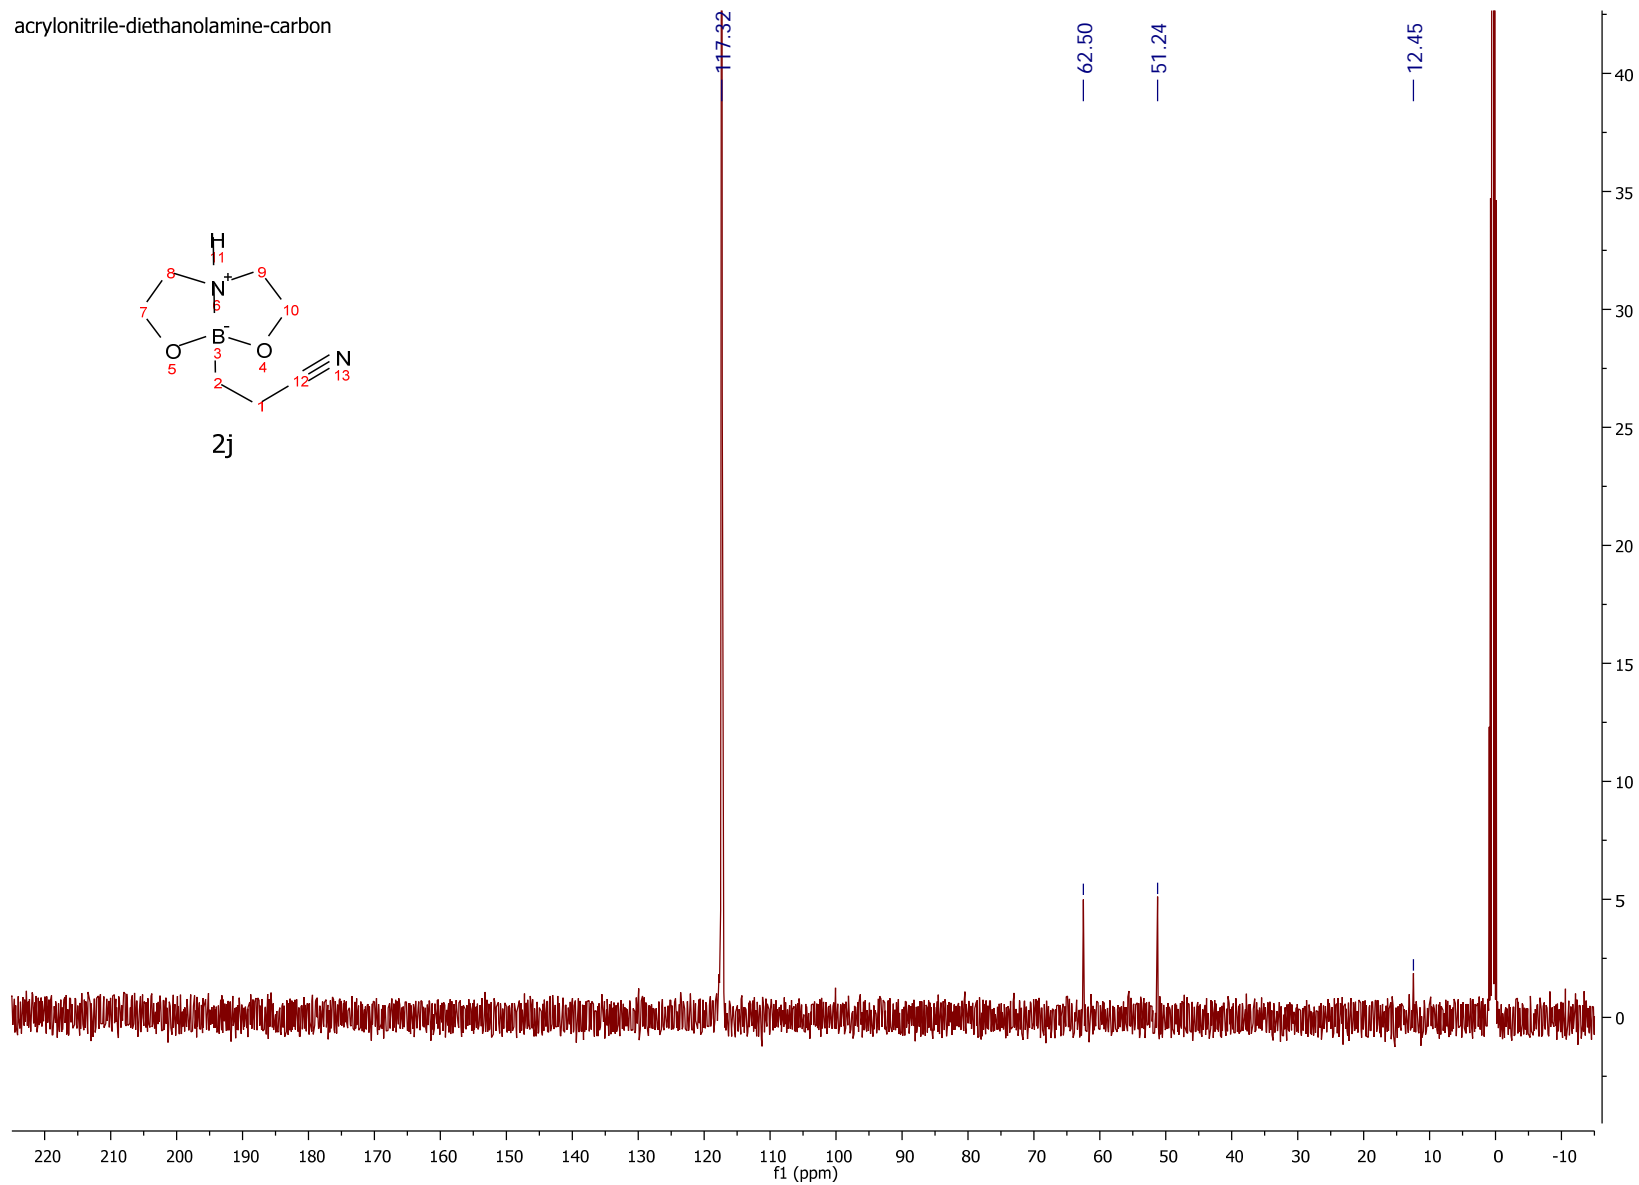

S#381680  
Single Pulse with Broadband Decoupling

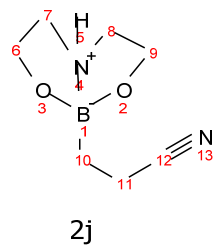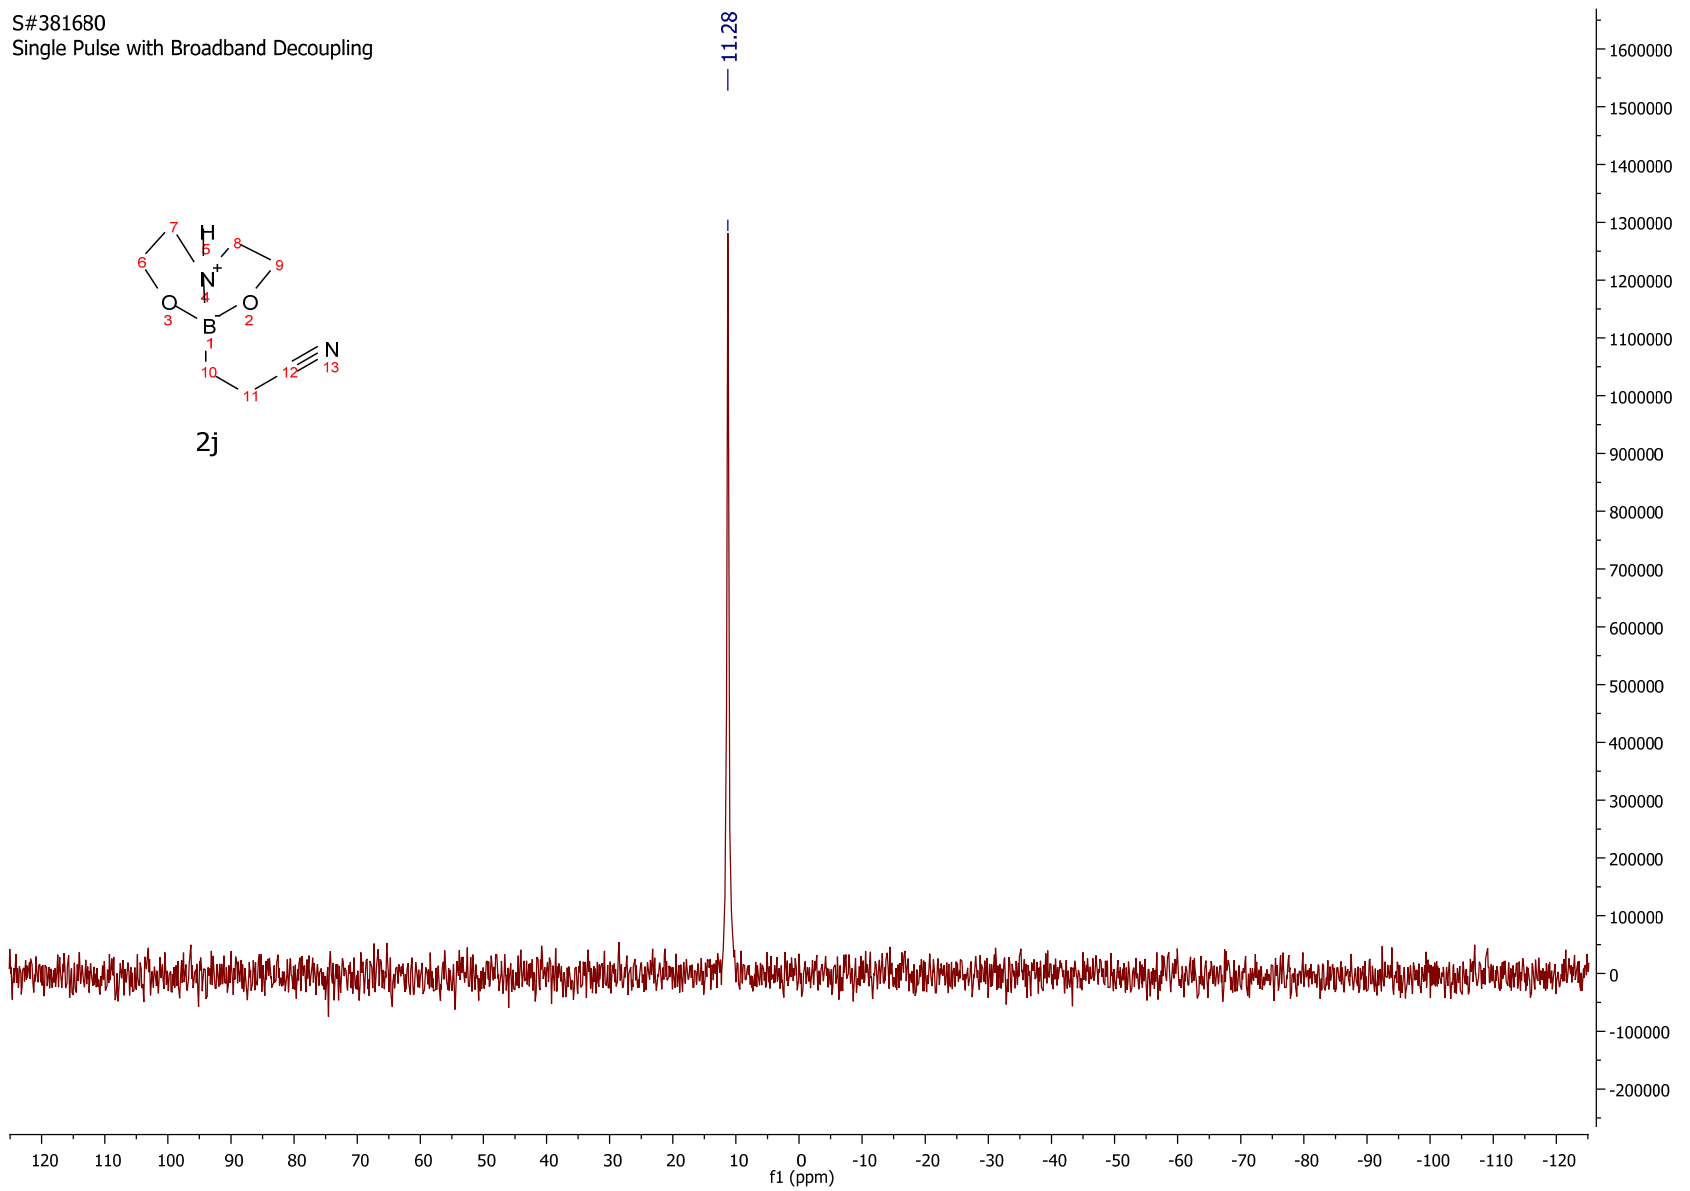



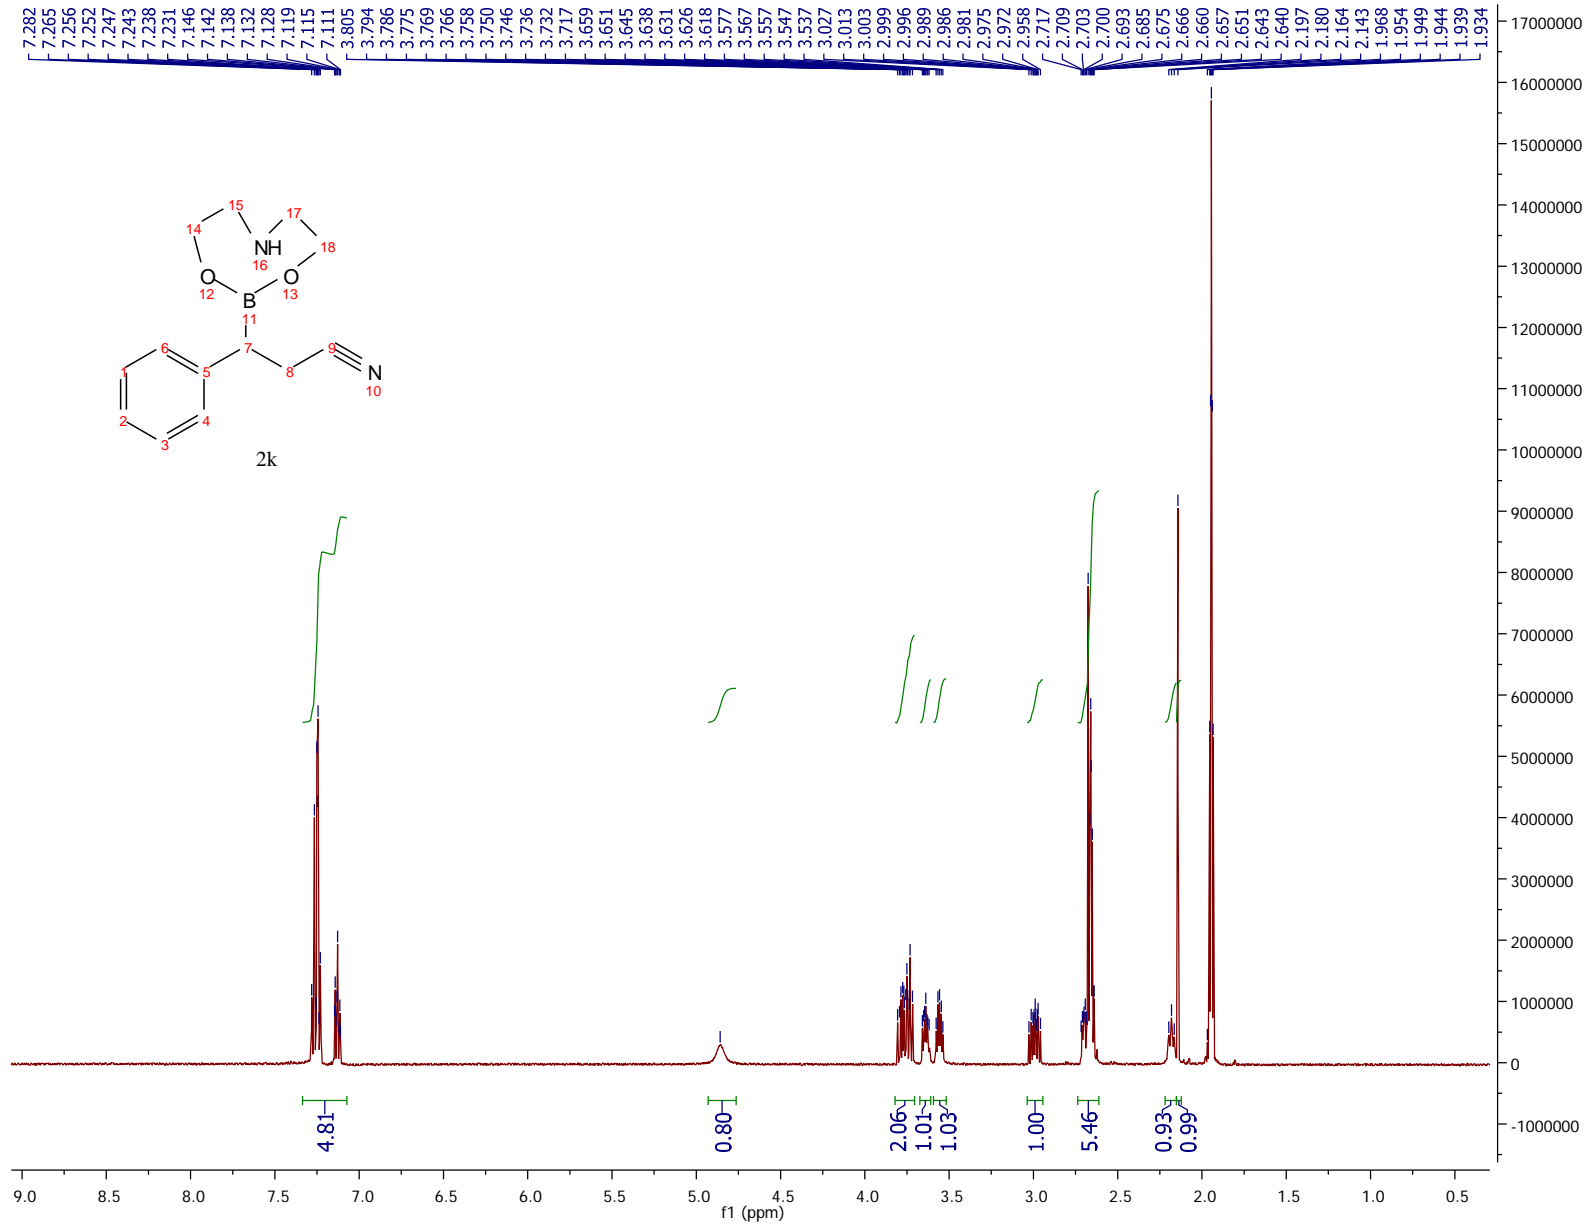

S#522693  
Single Pulse with Broadband Decoupling

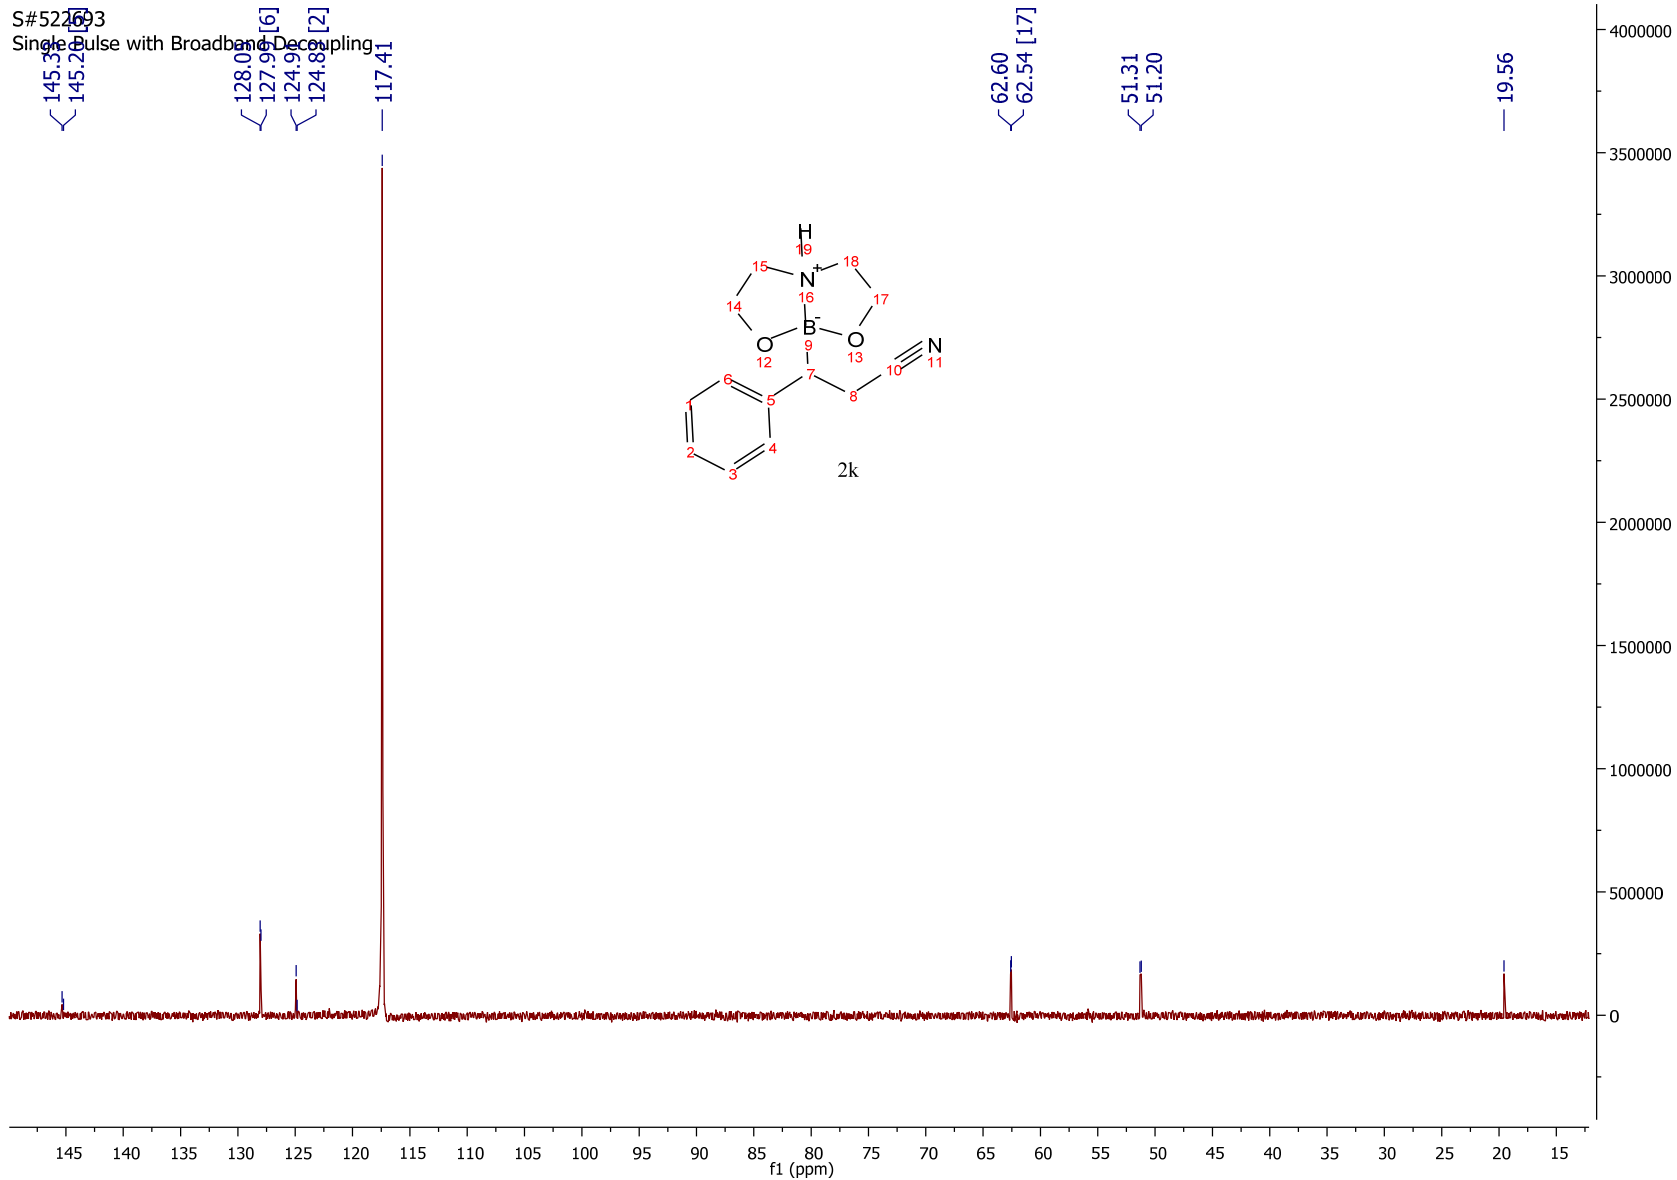

S#370674  
Single Pulse with Broadband Decoupling

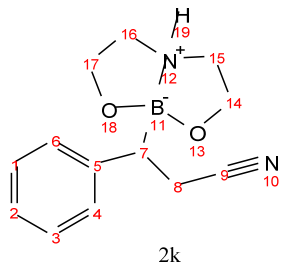

2k

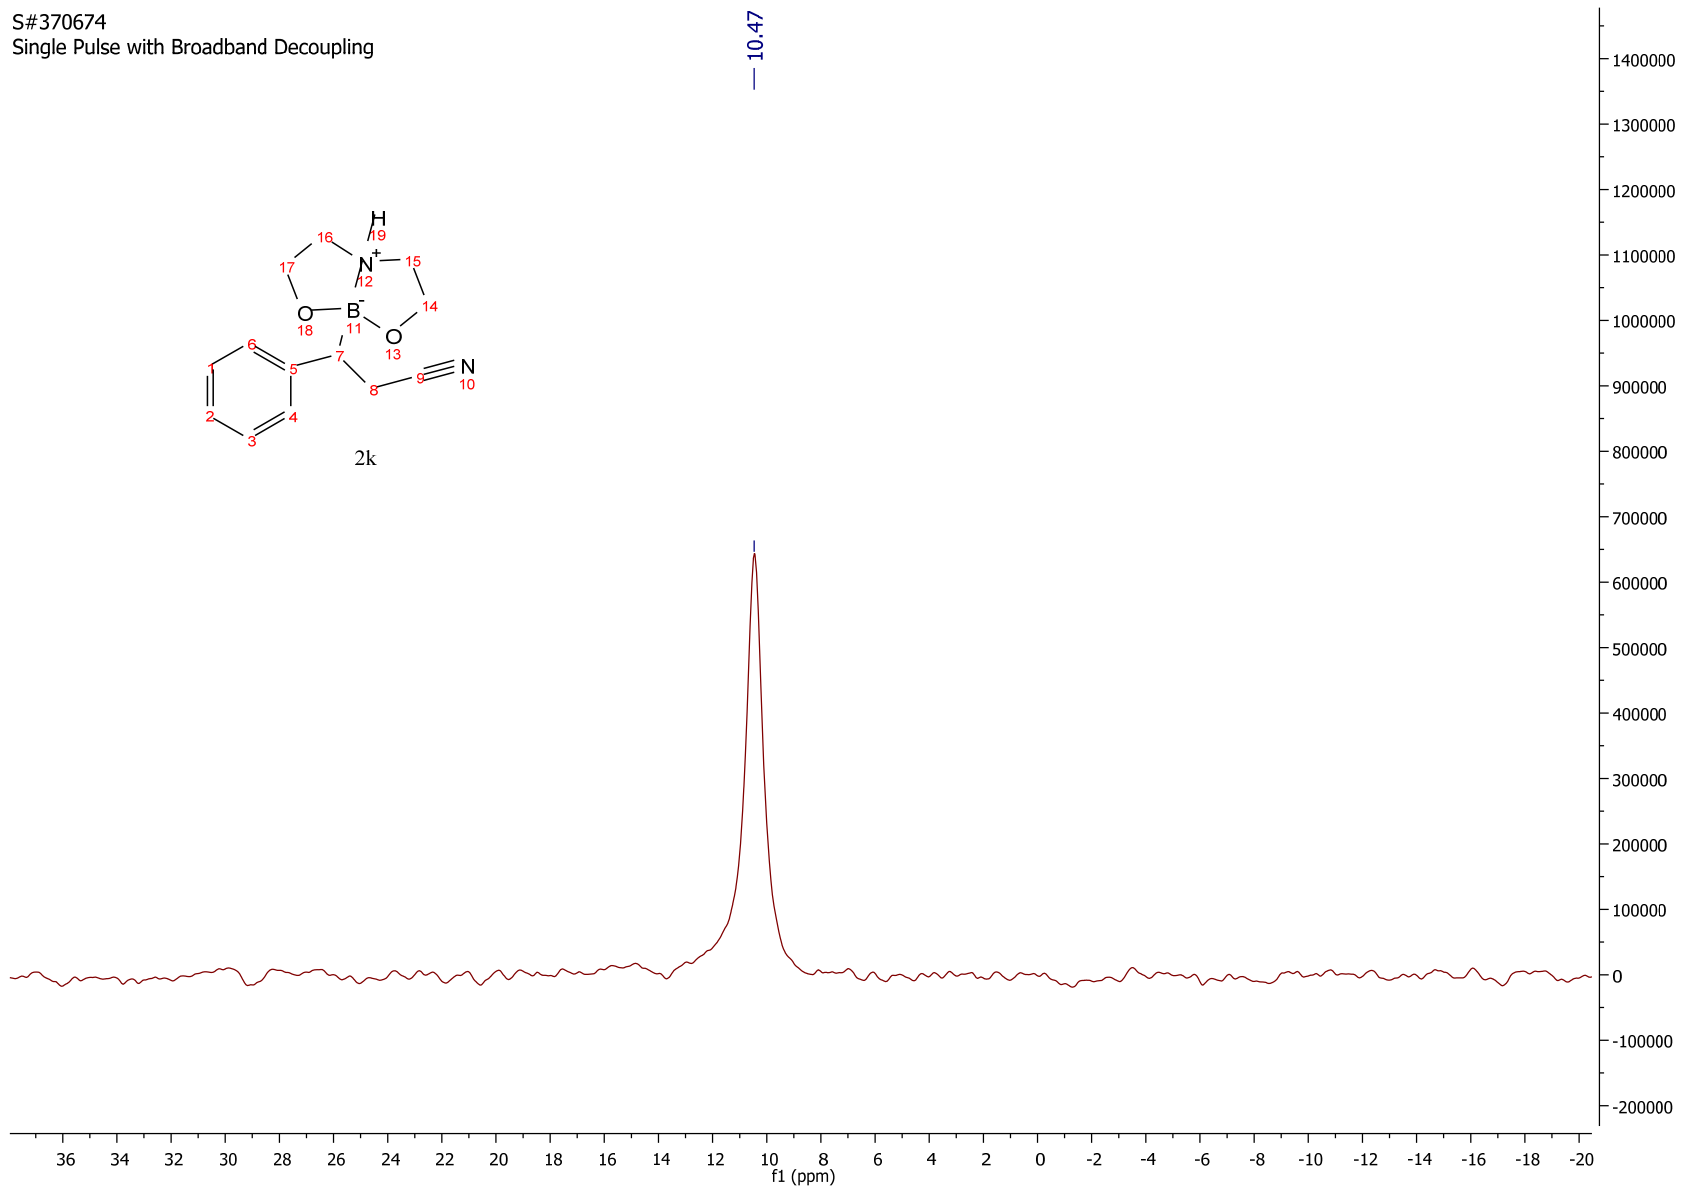

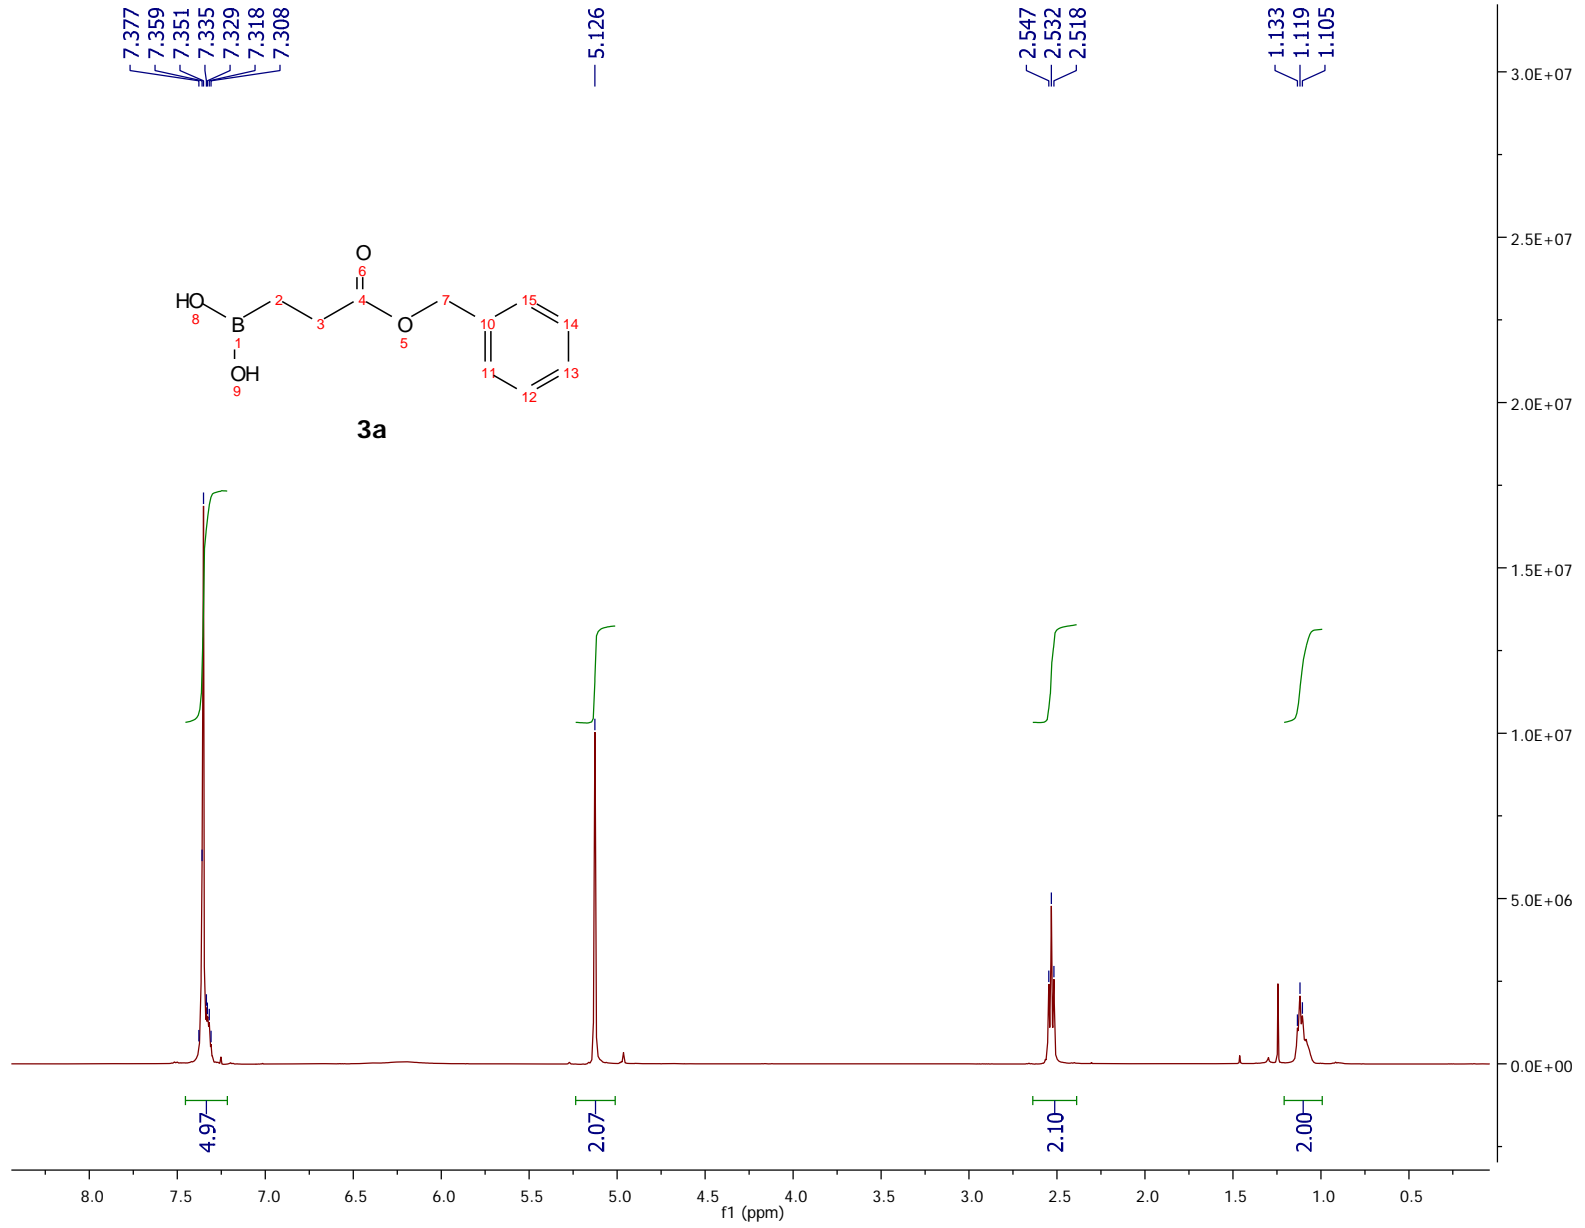

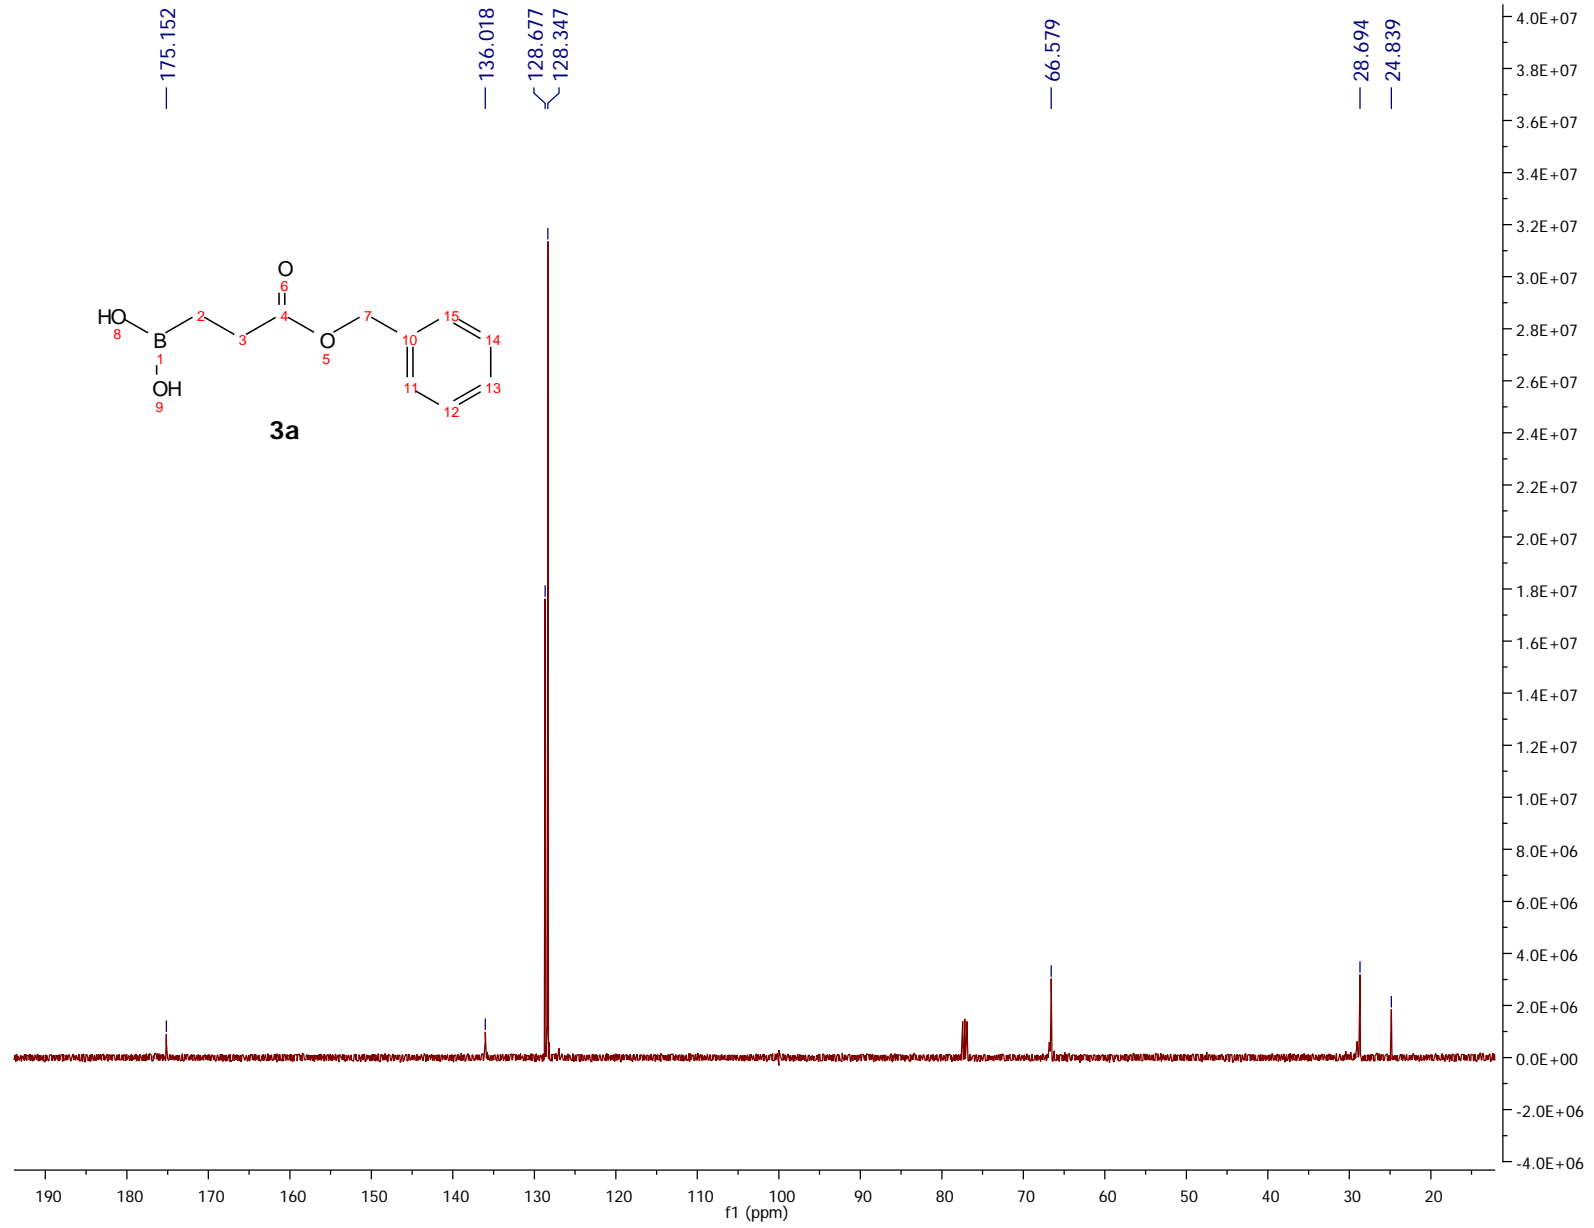

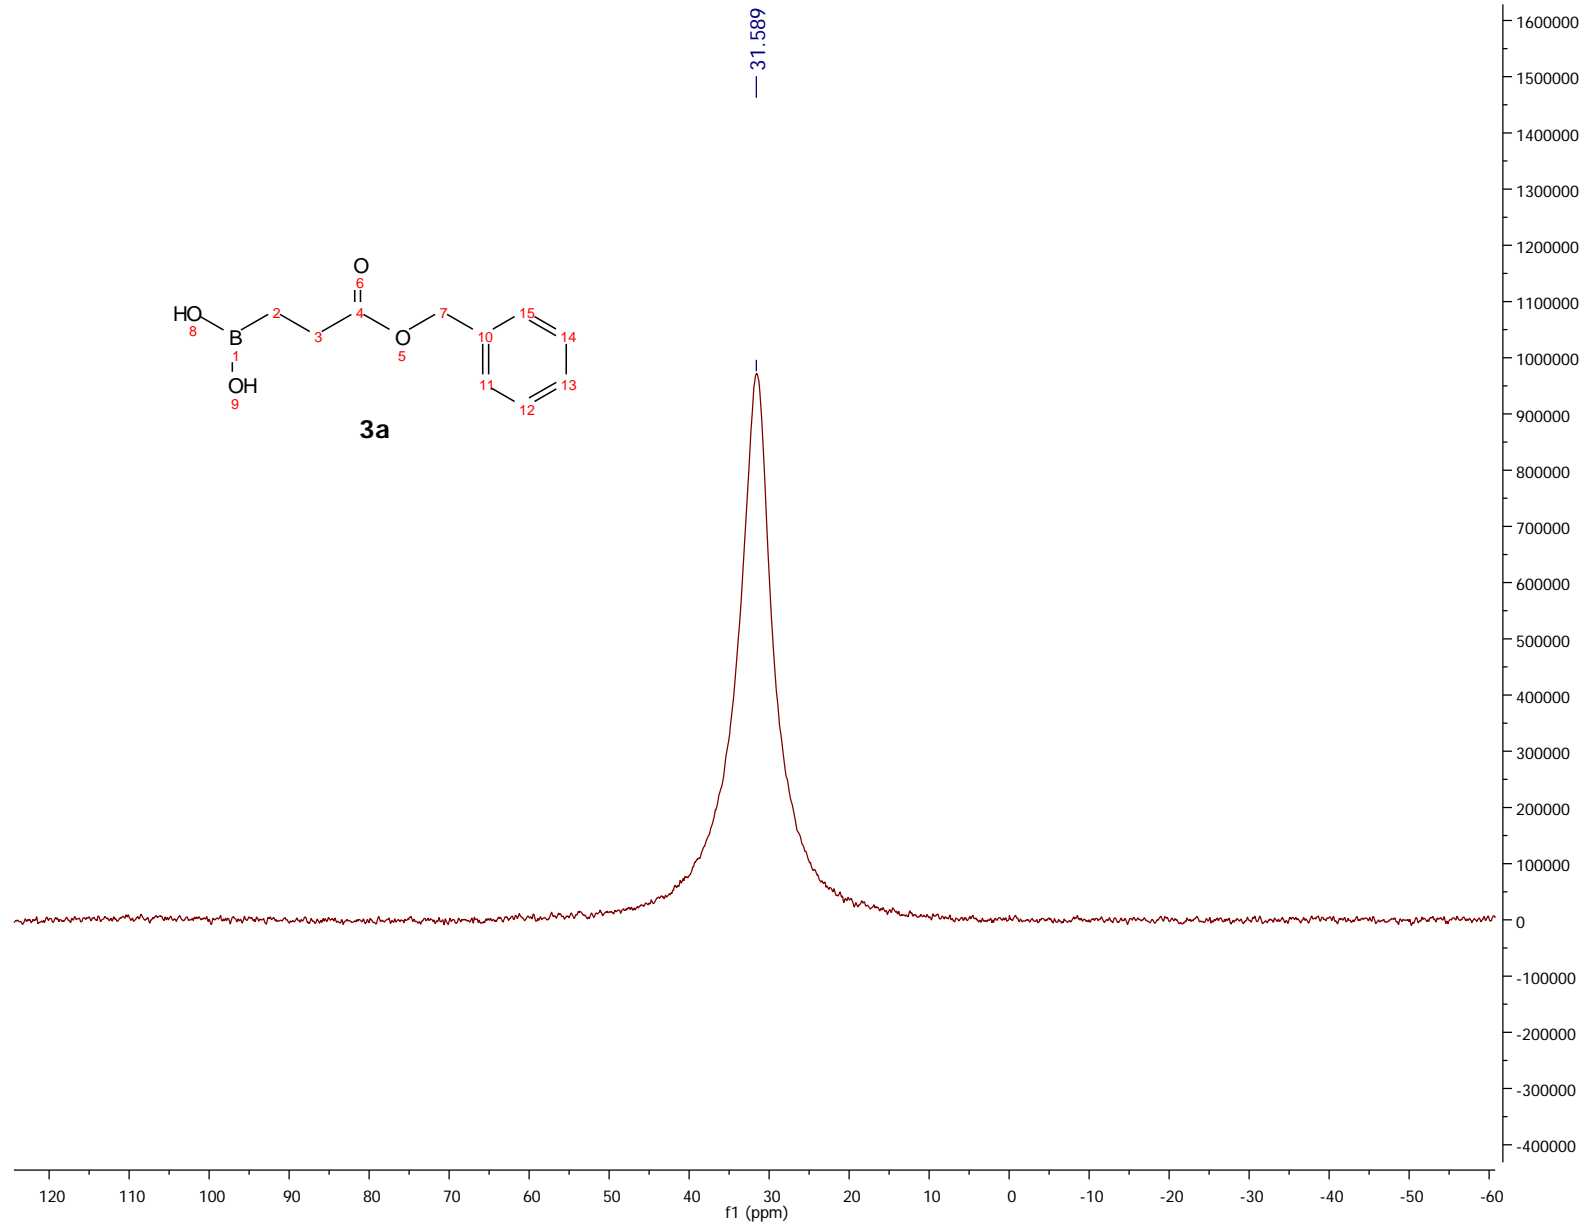

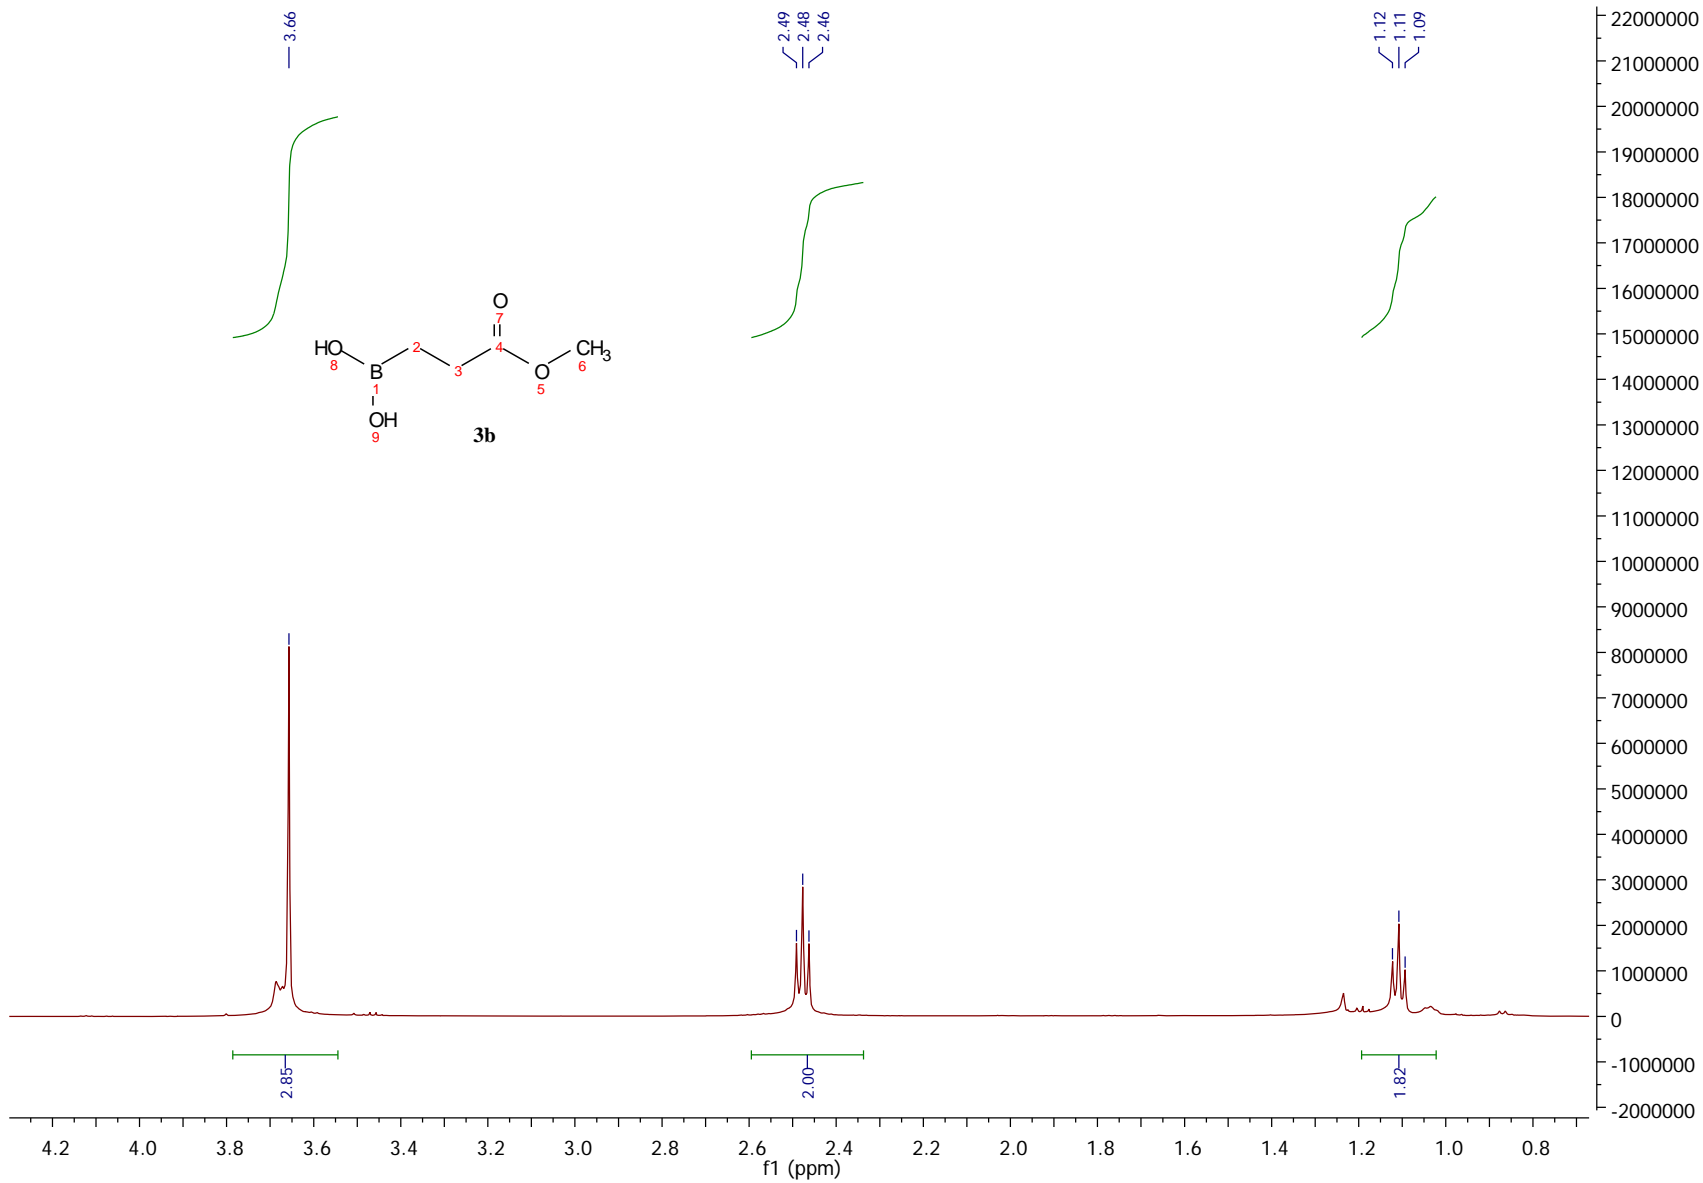

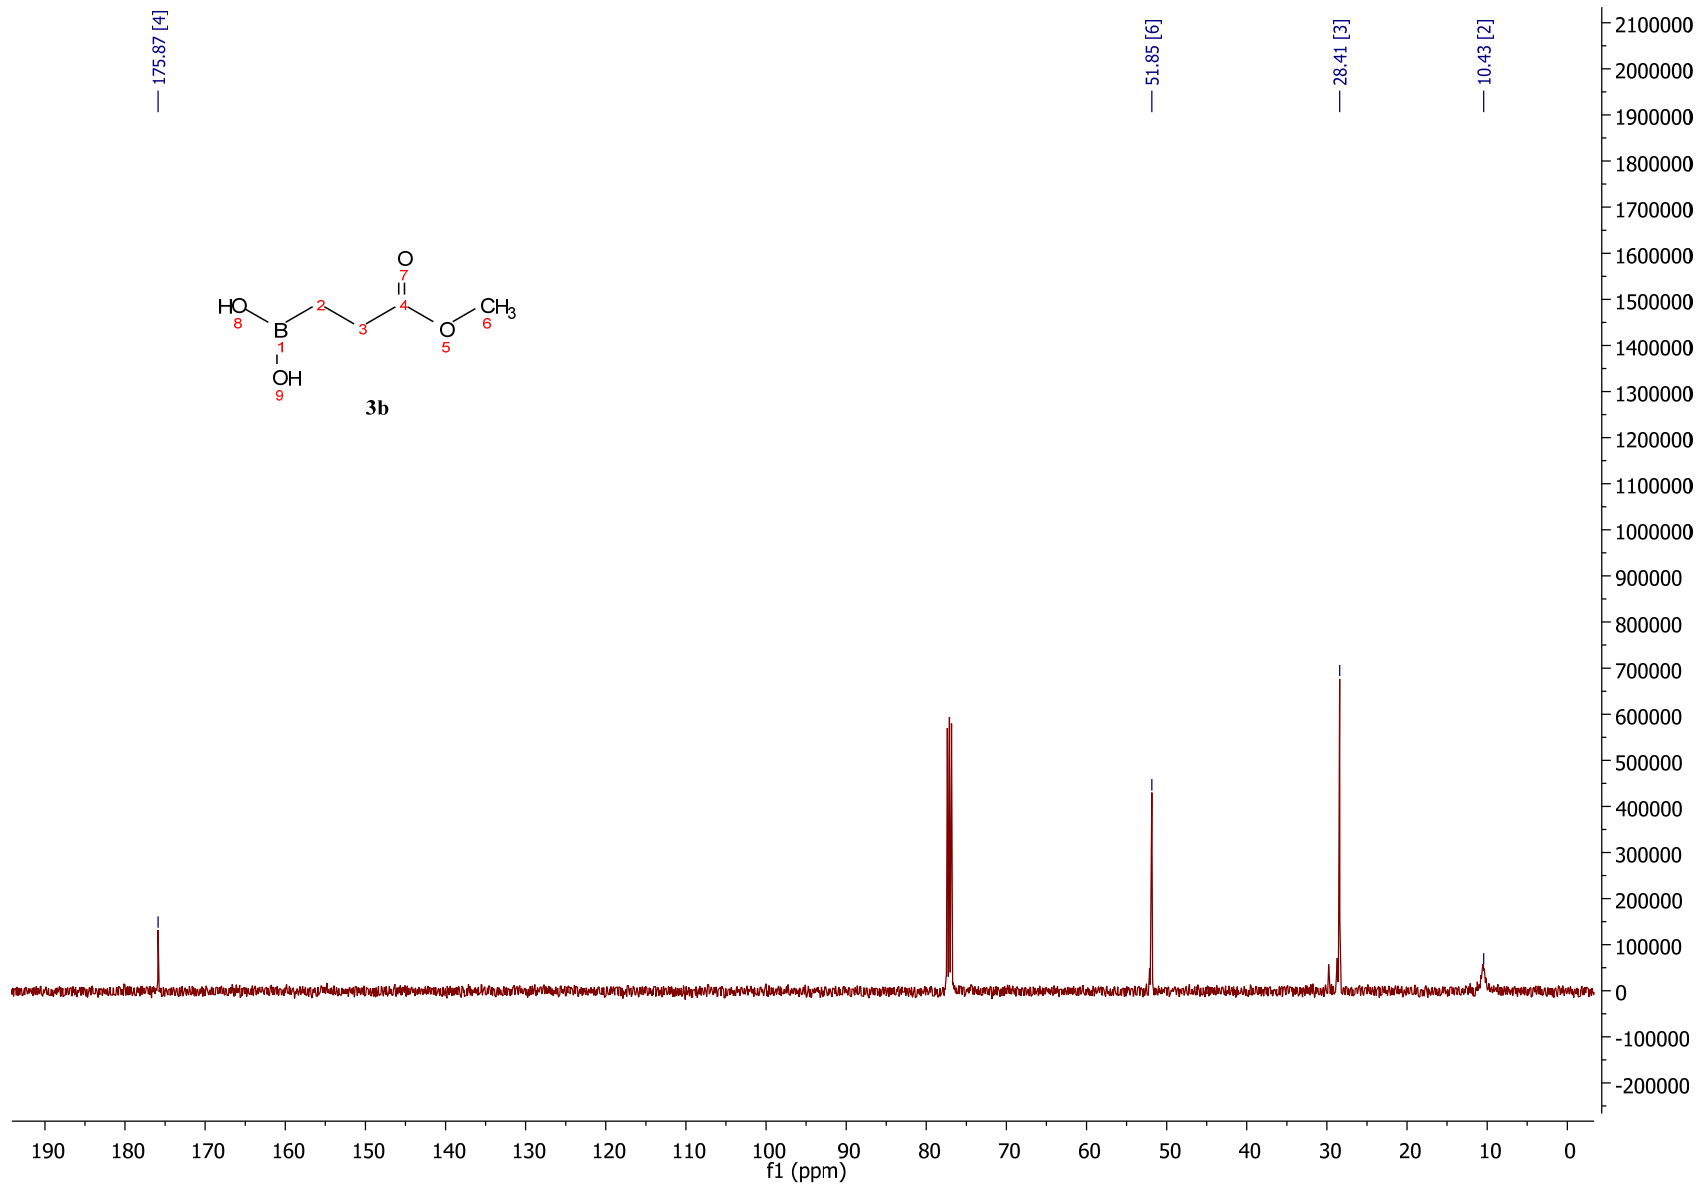



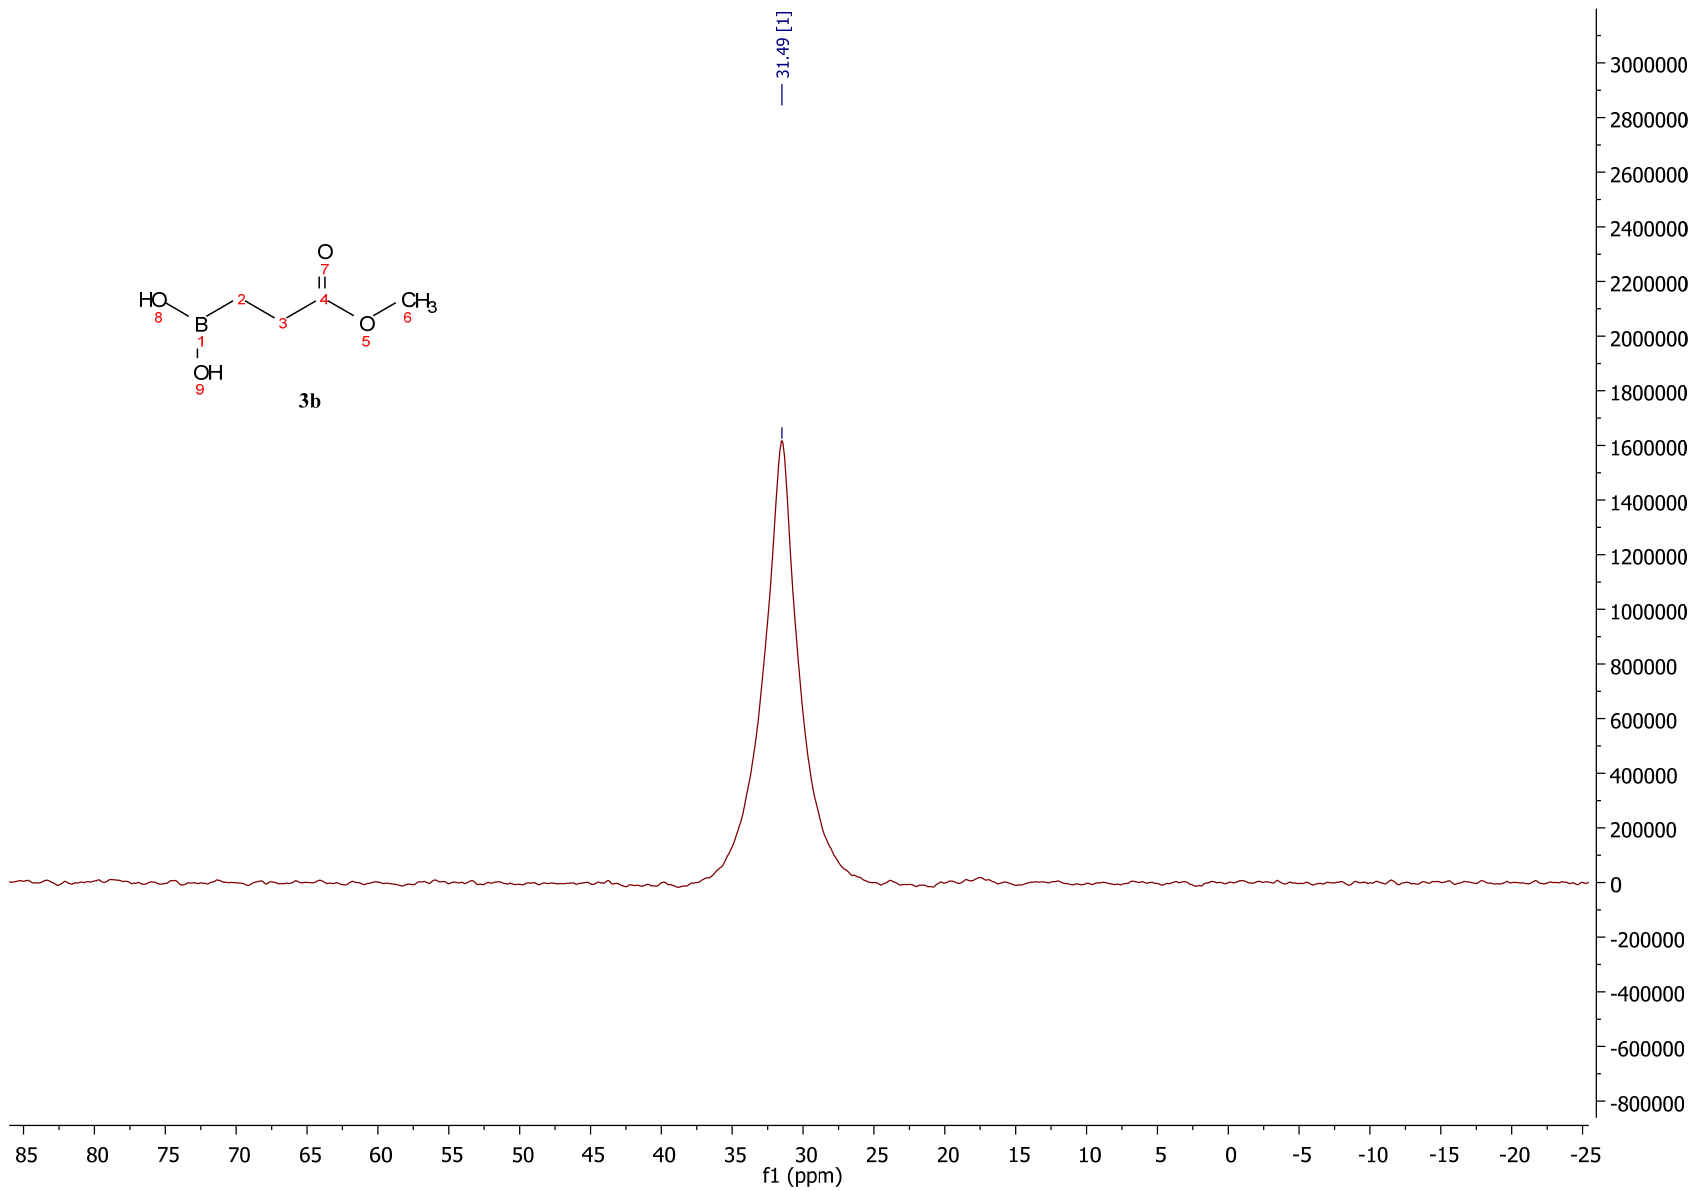

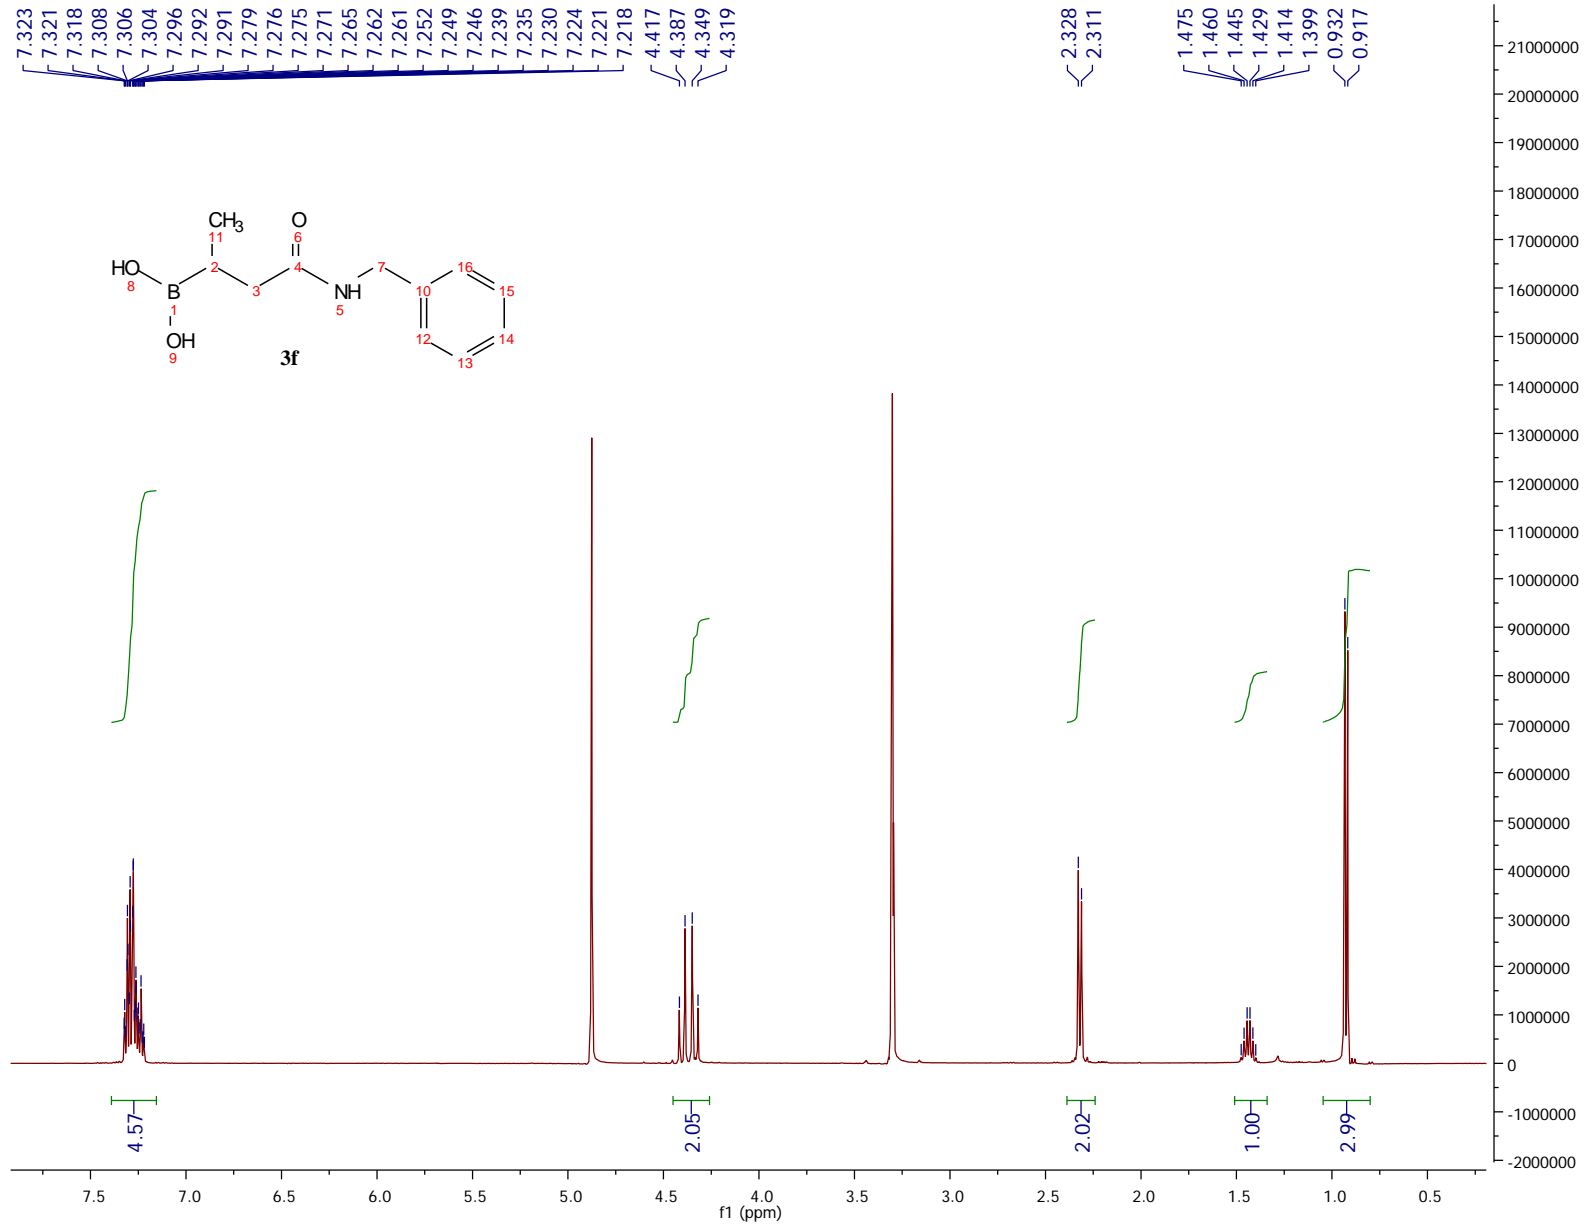

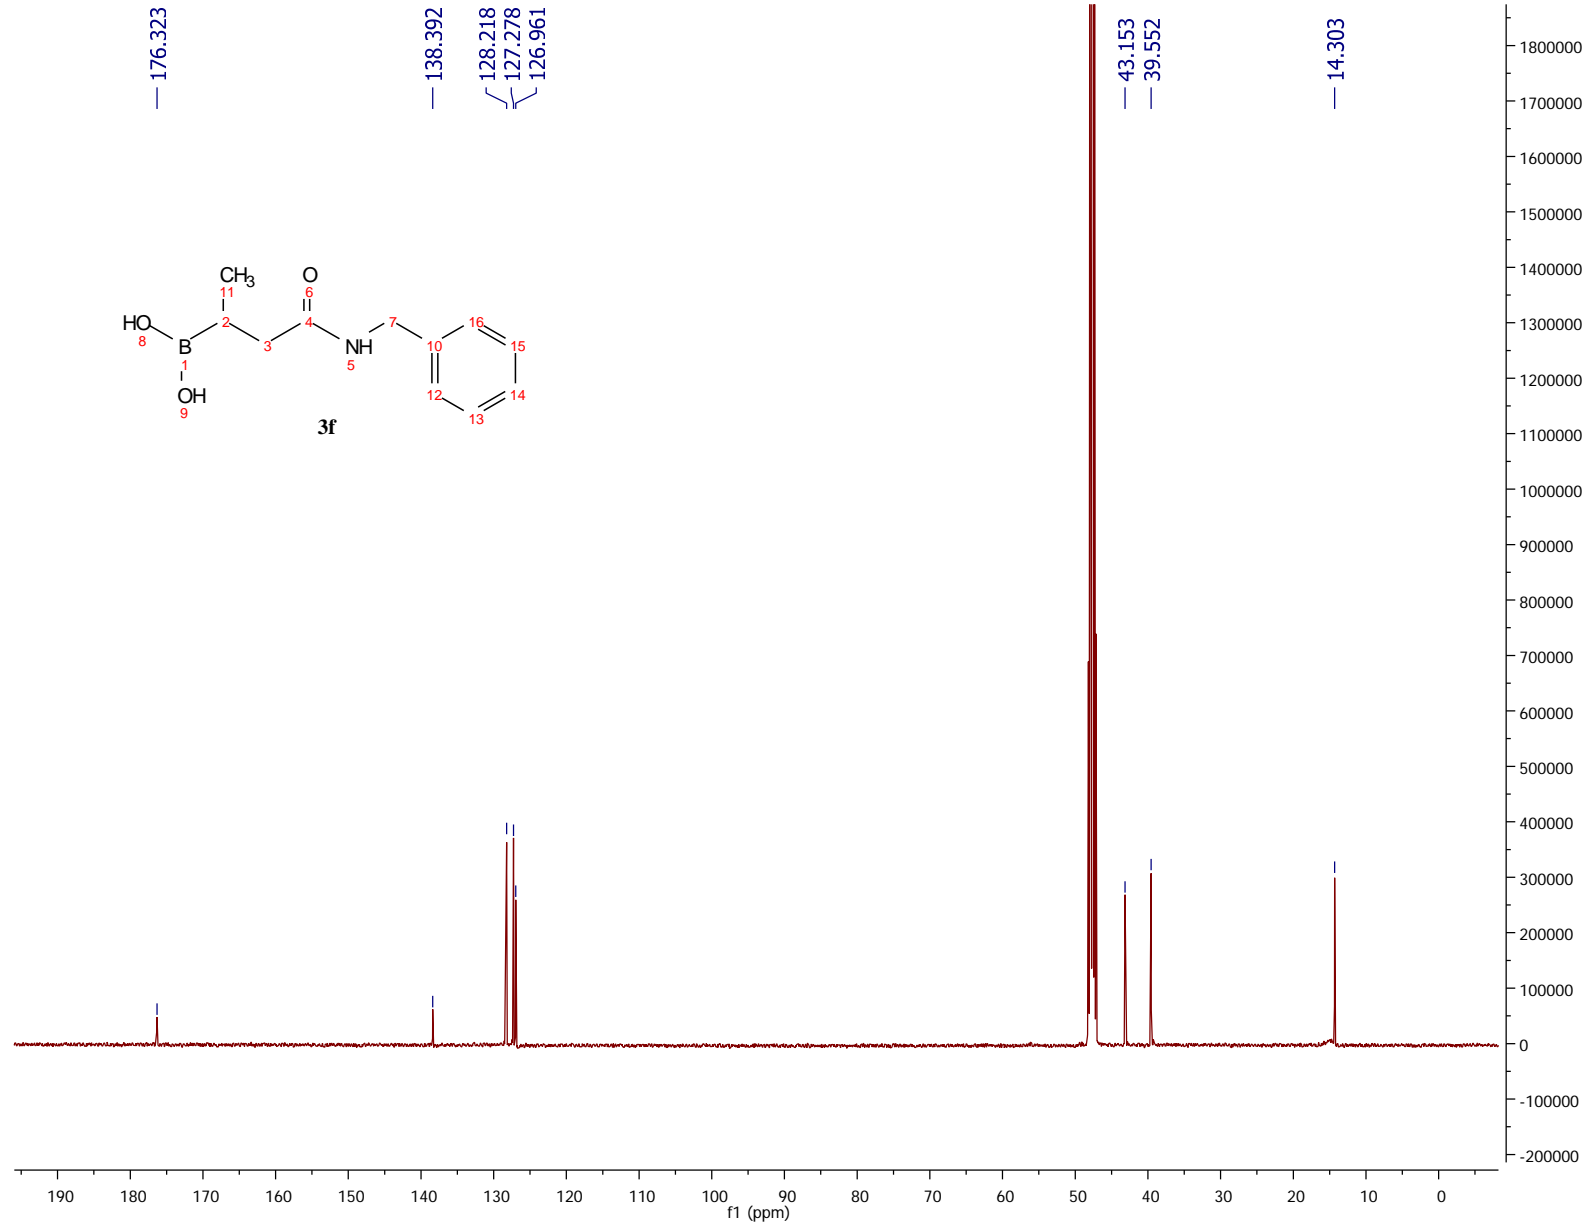

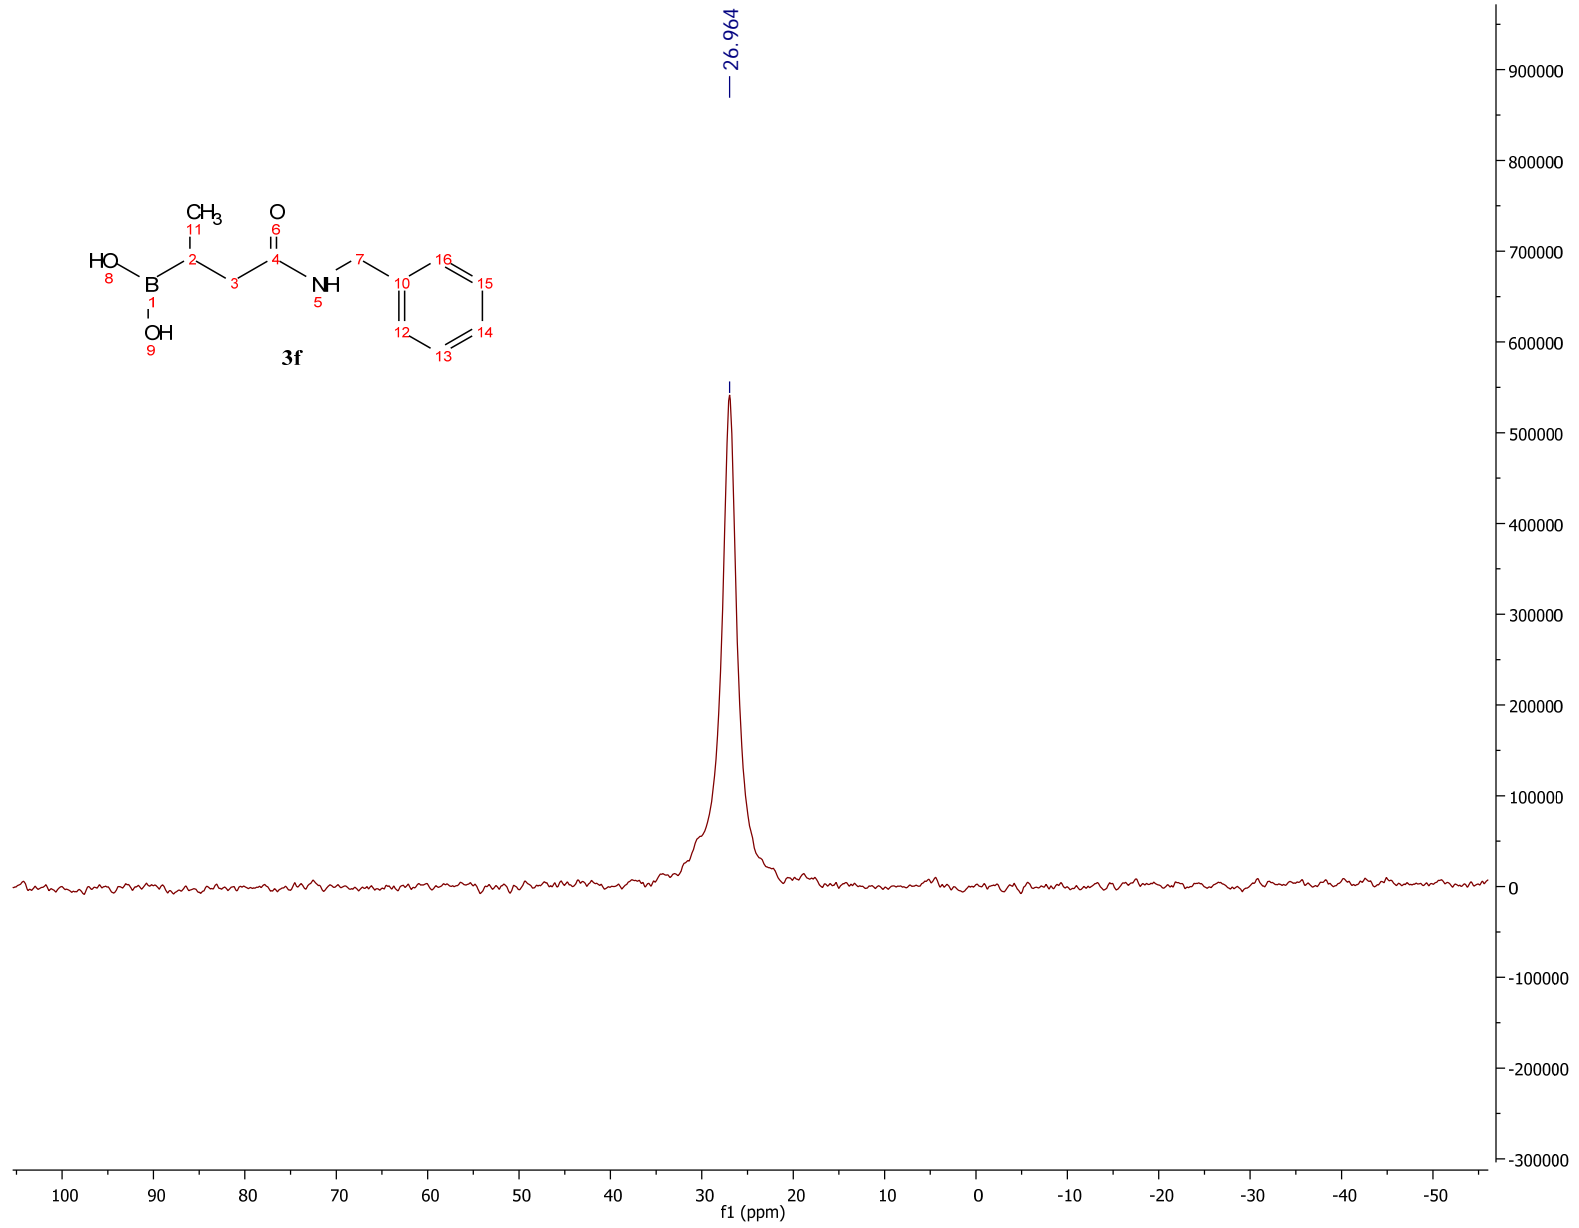

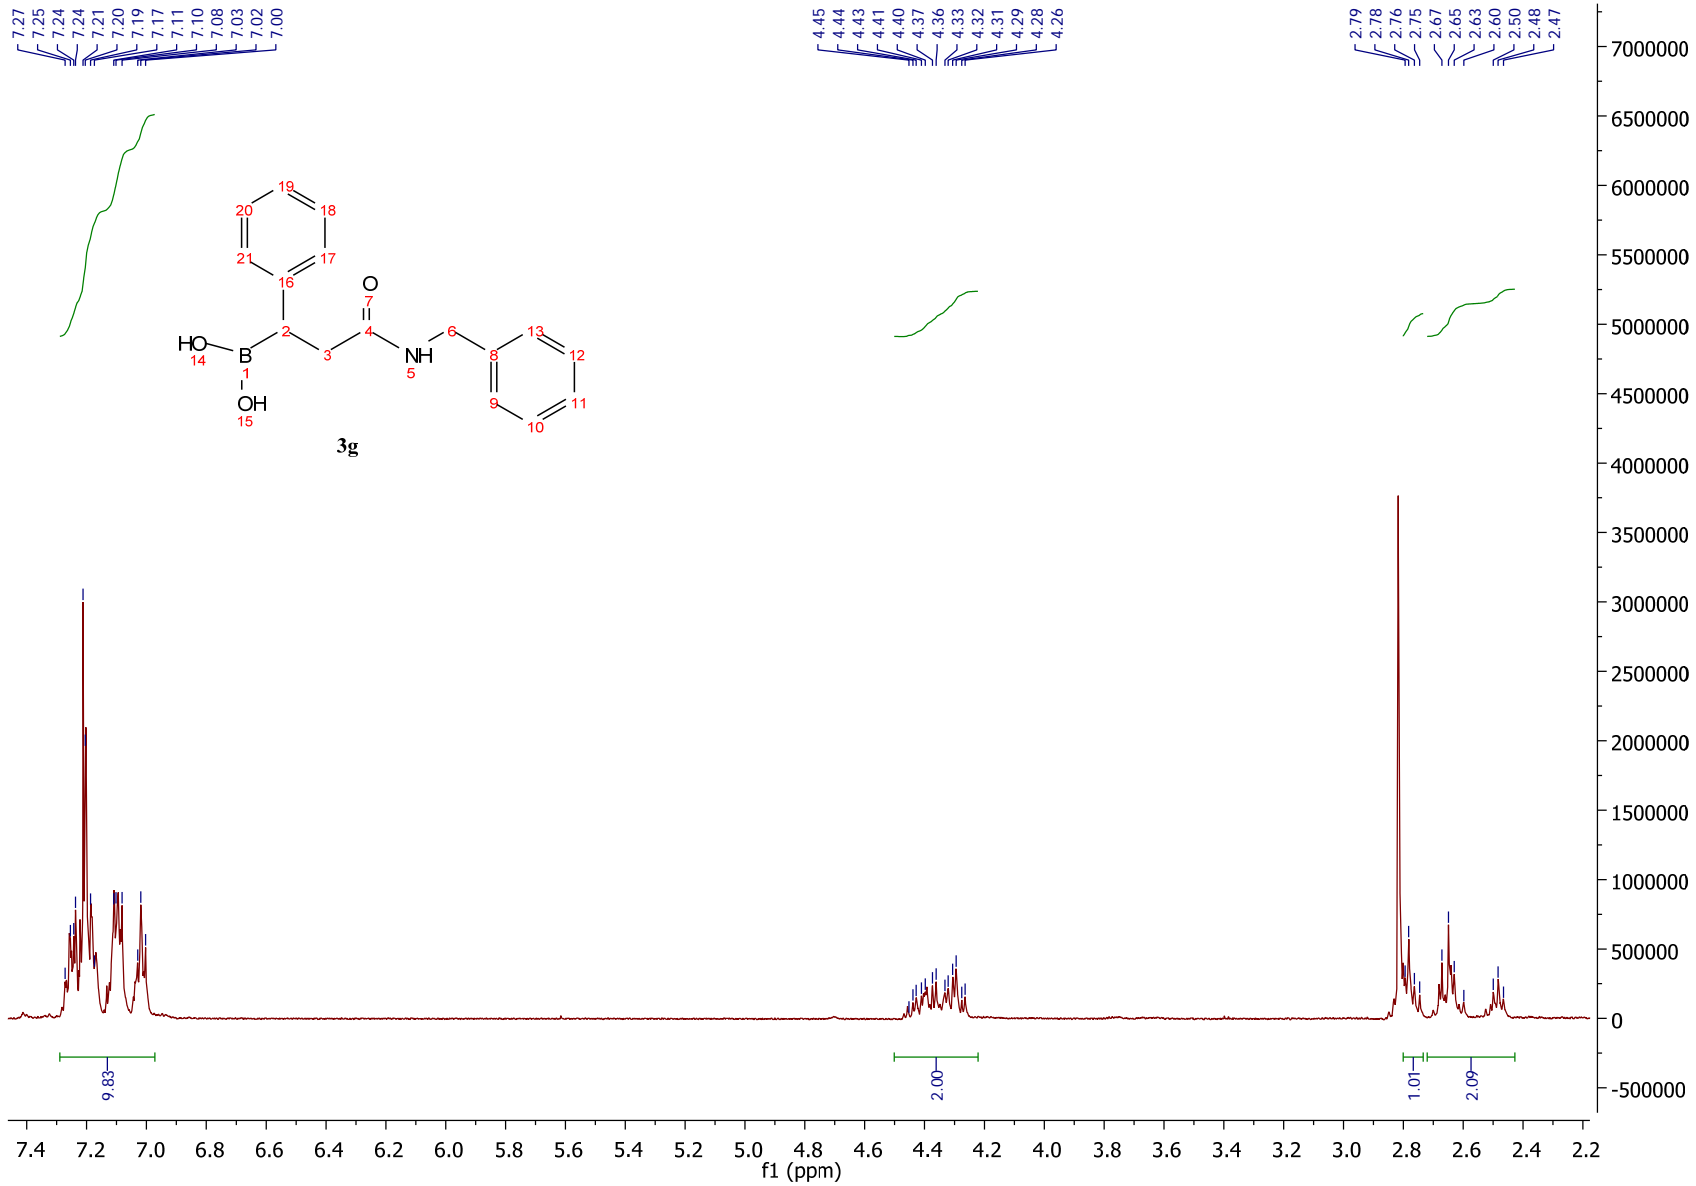

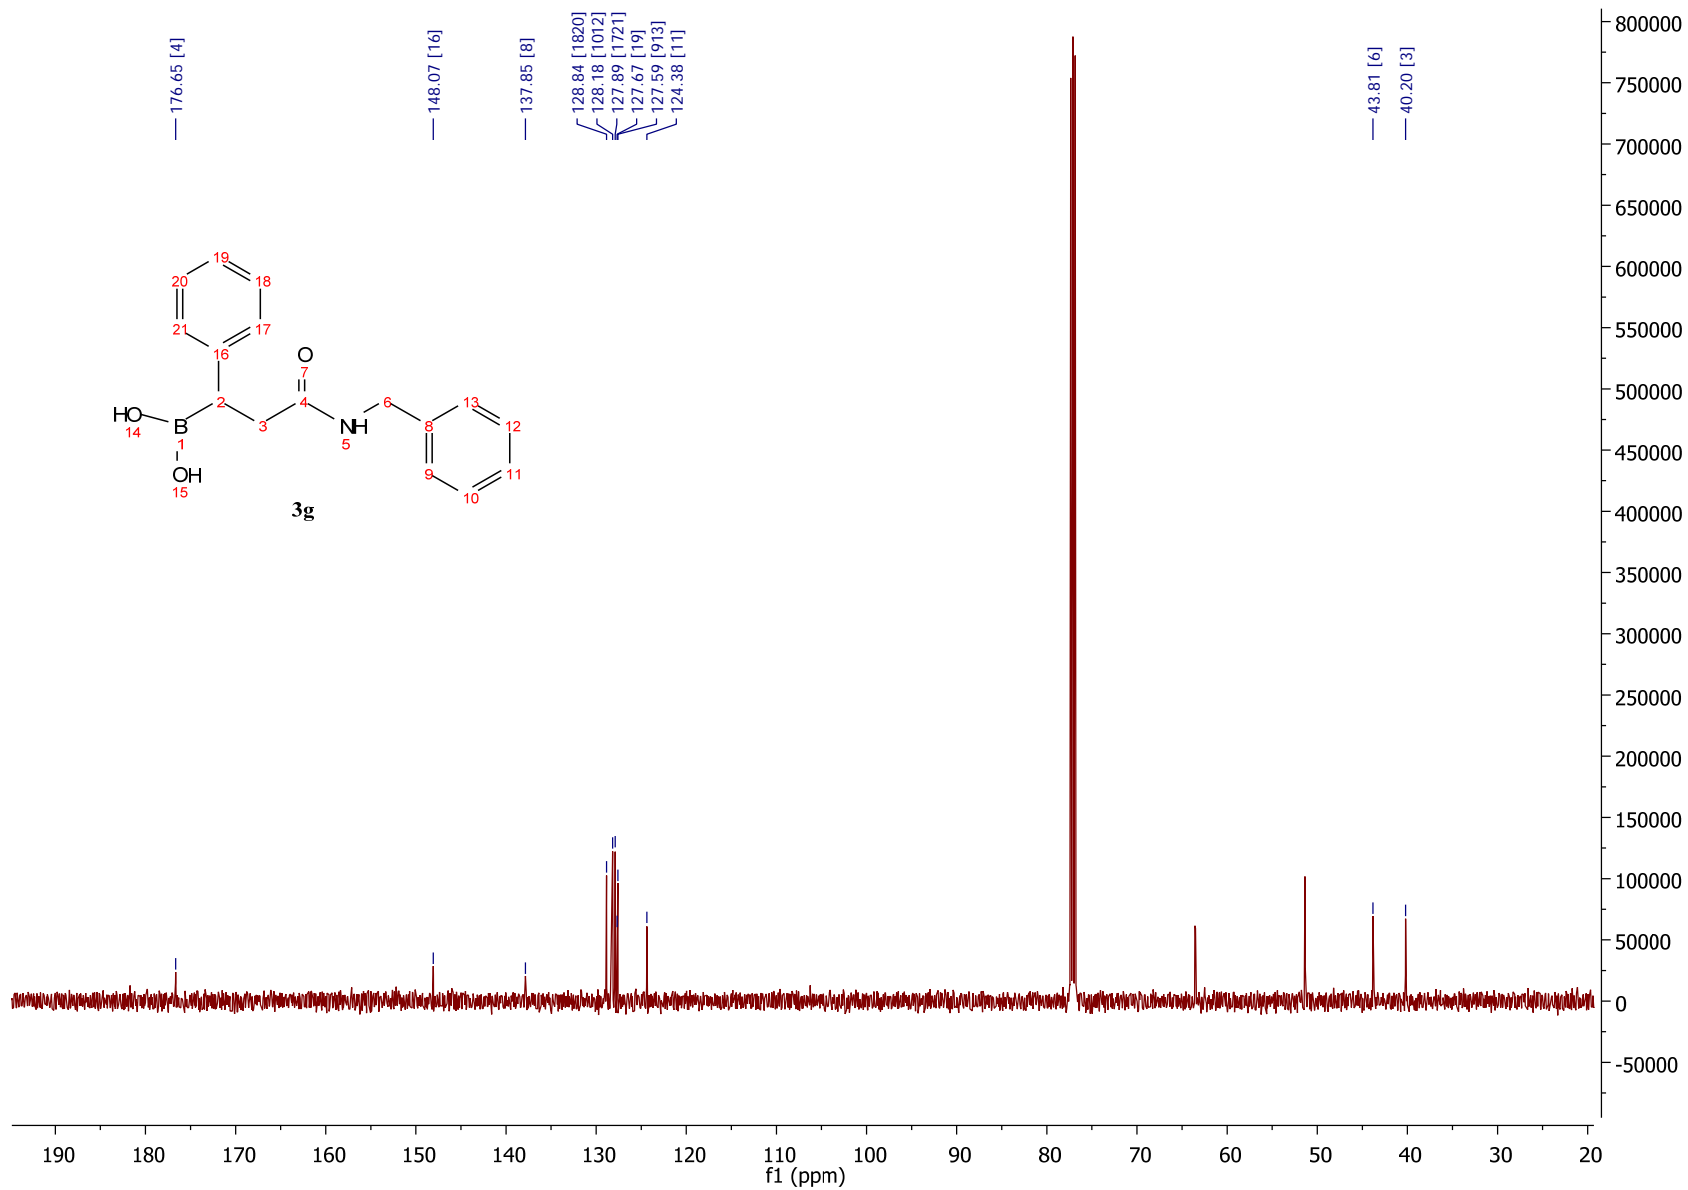

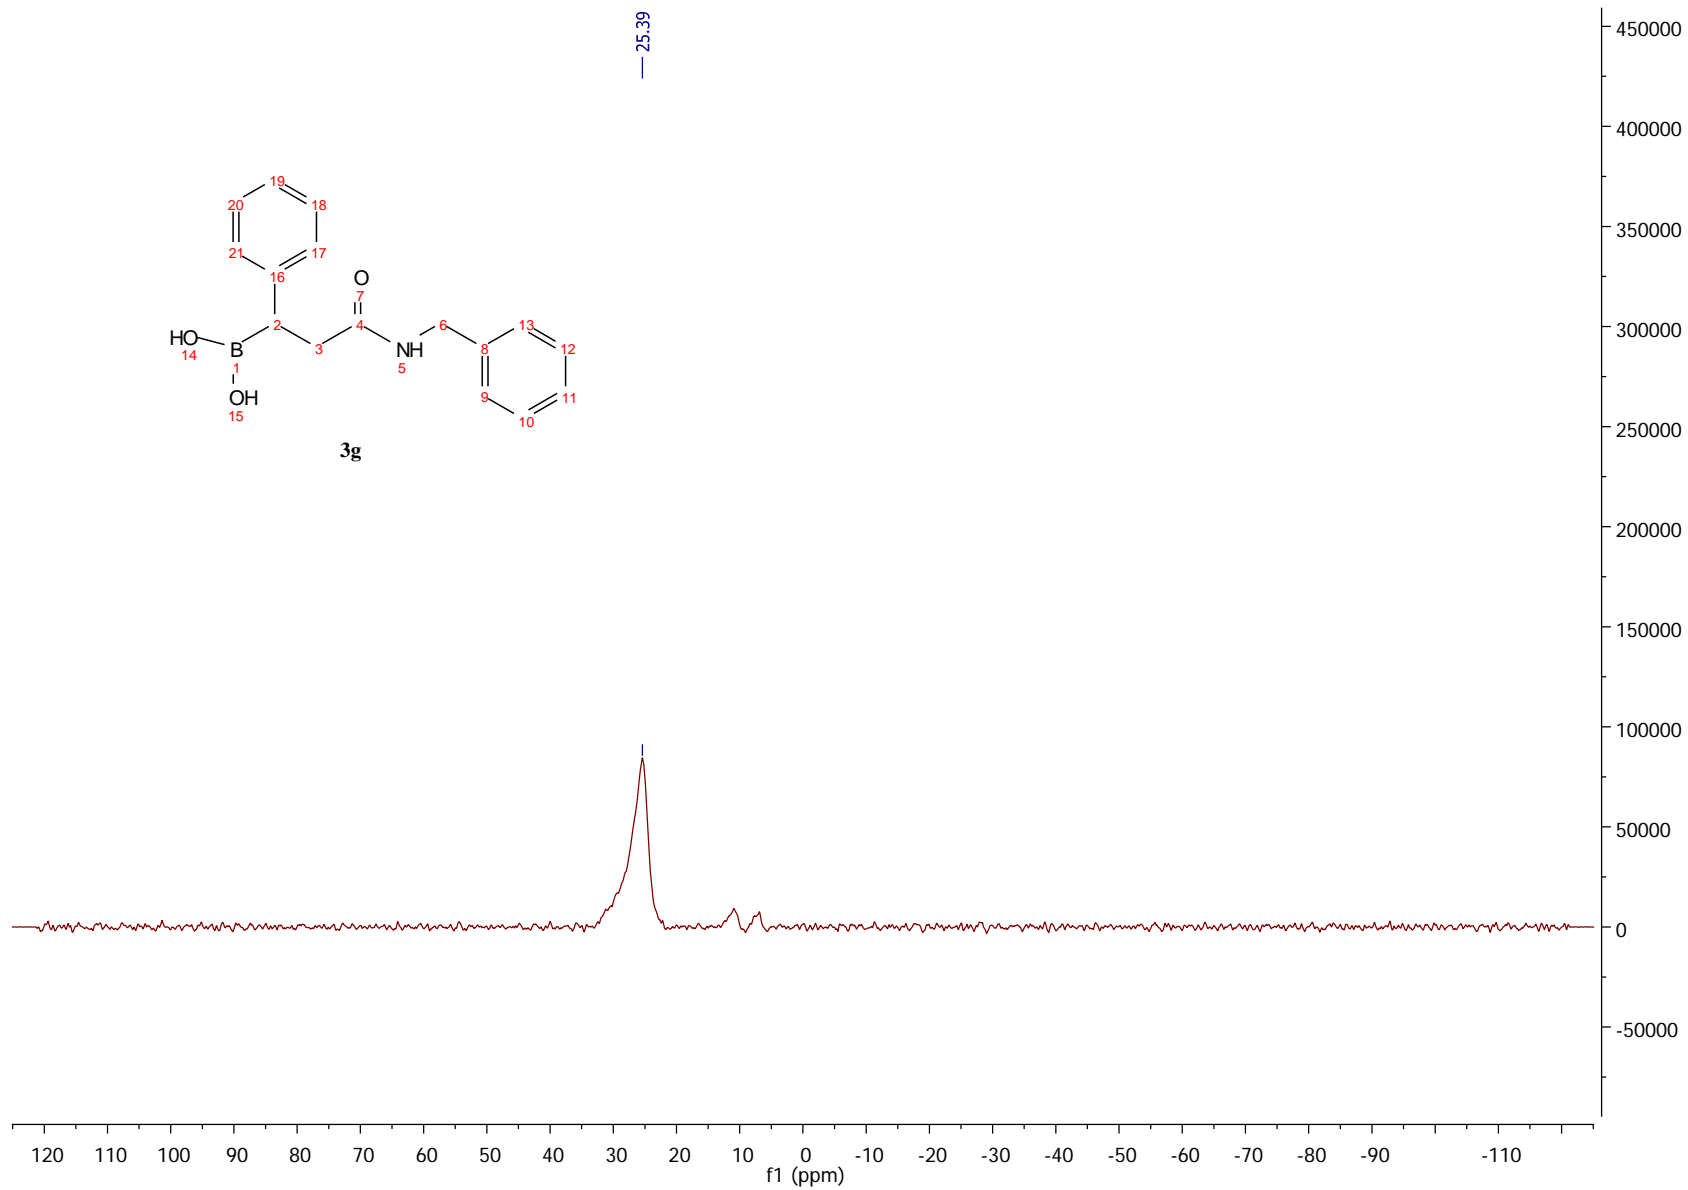

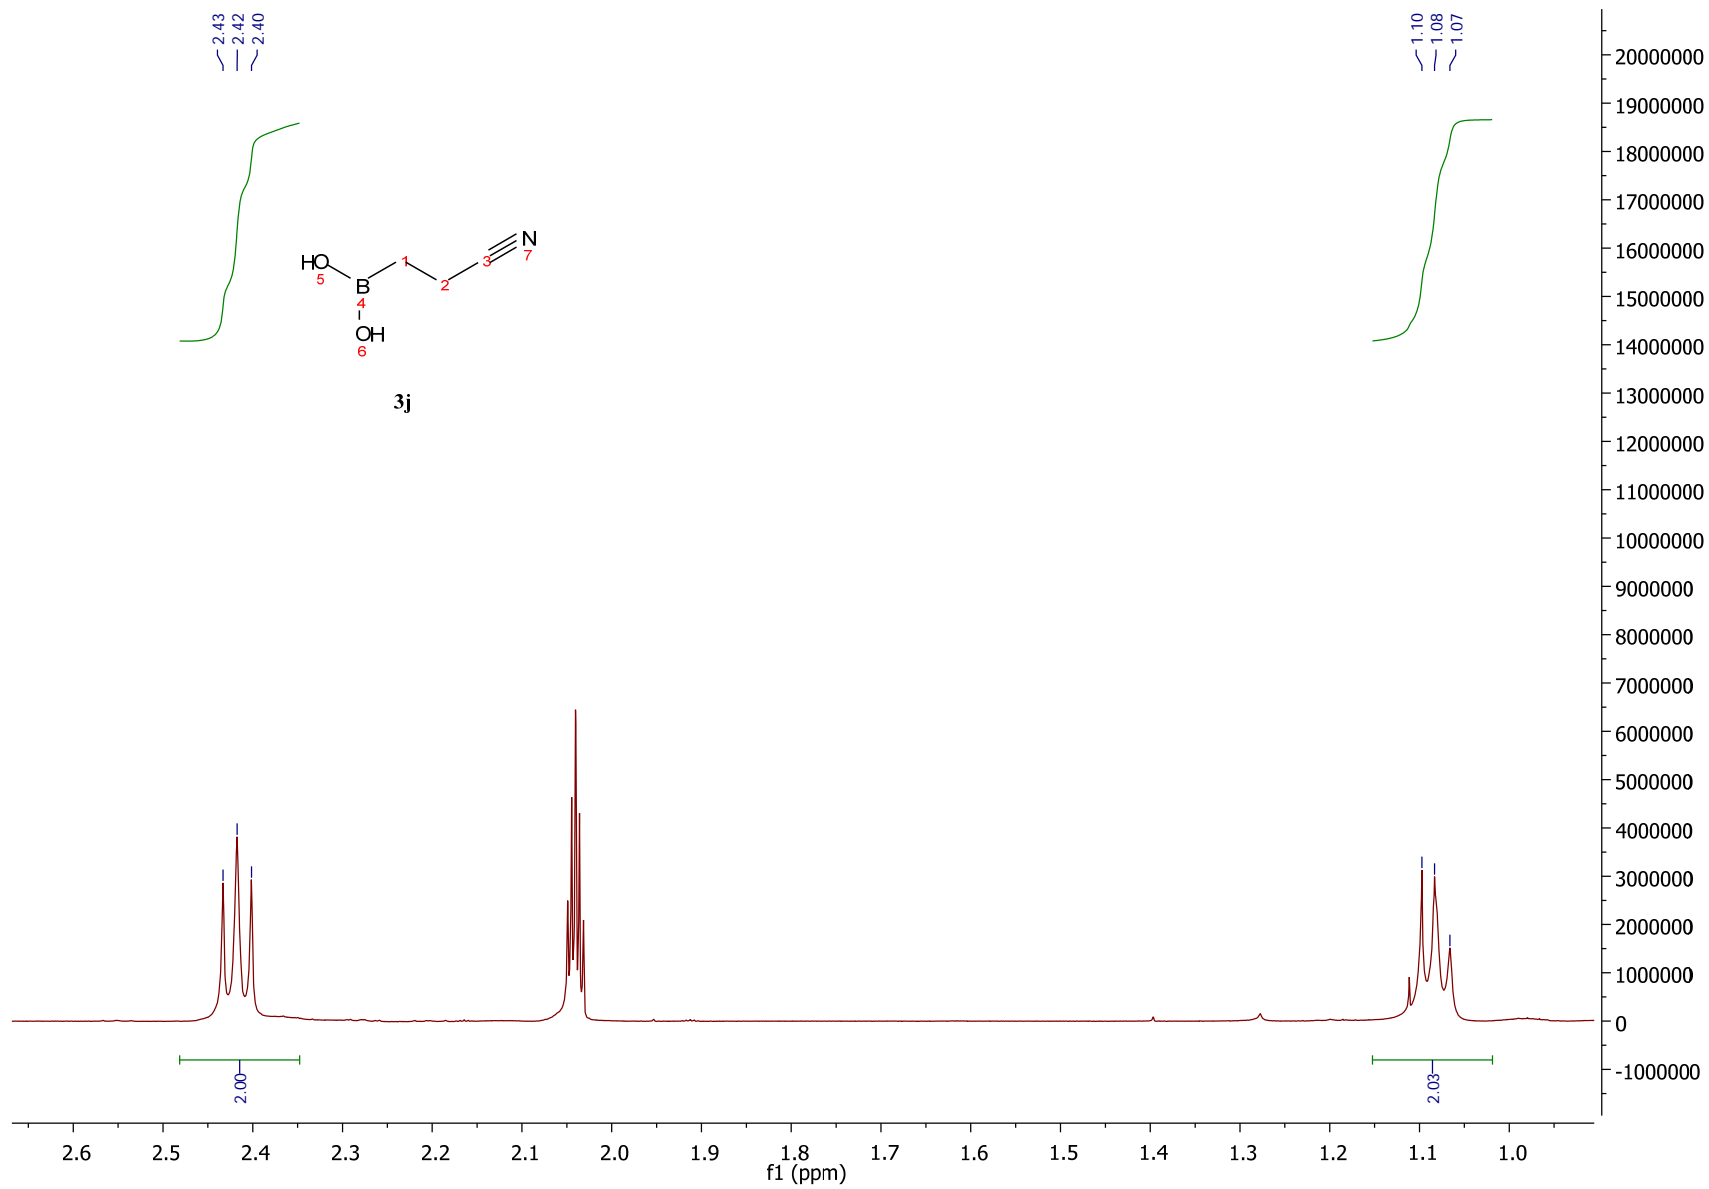



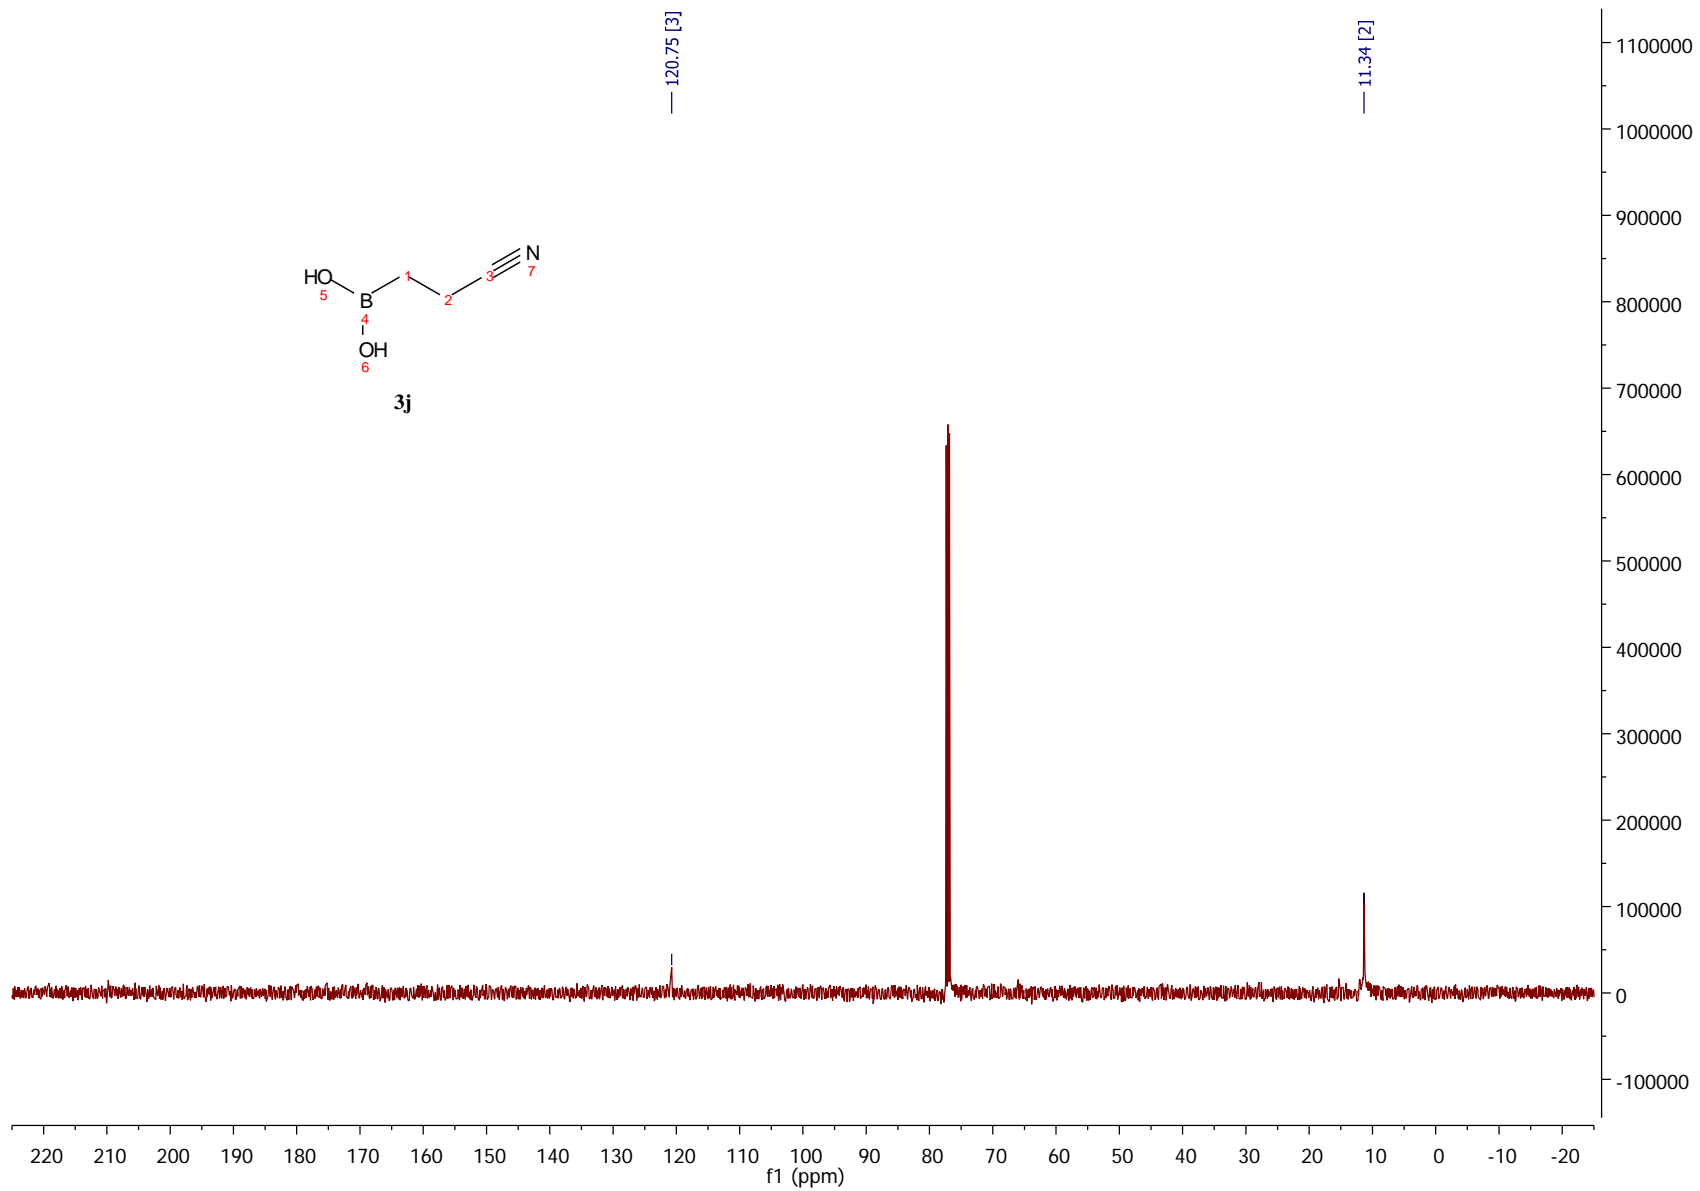

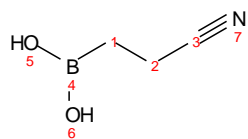

3j

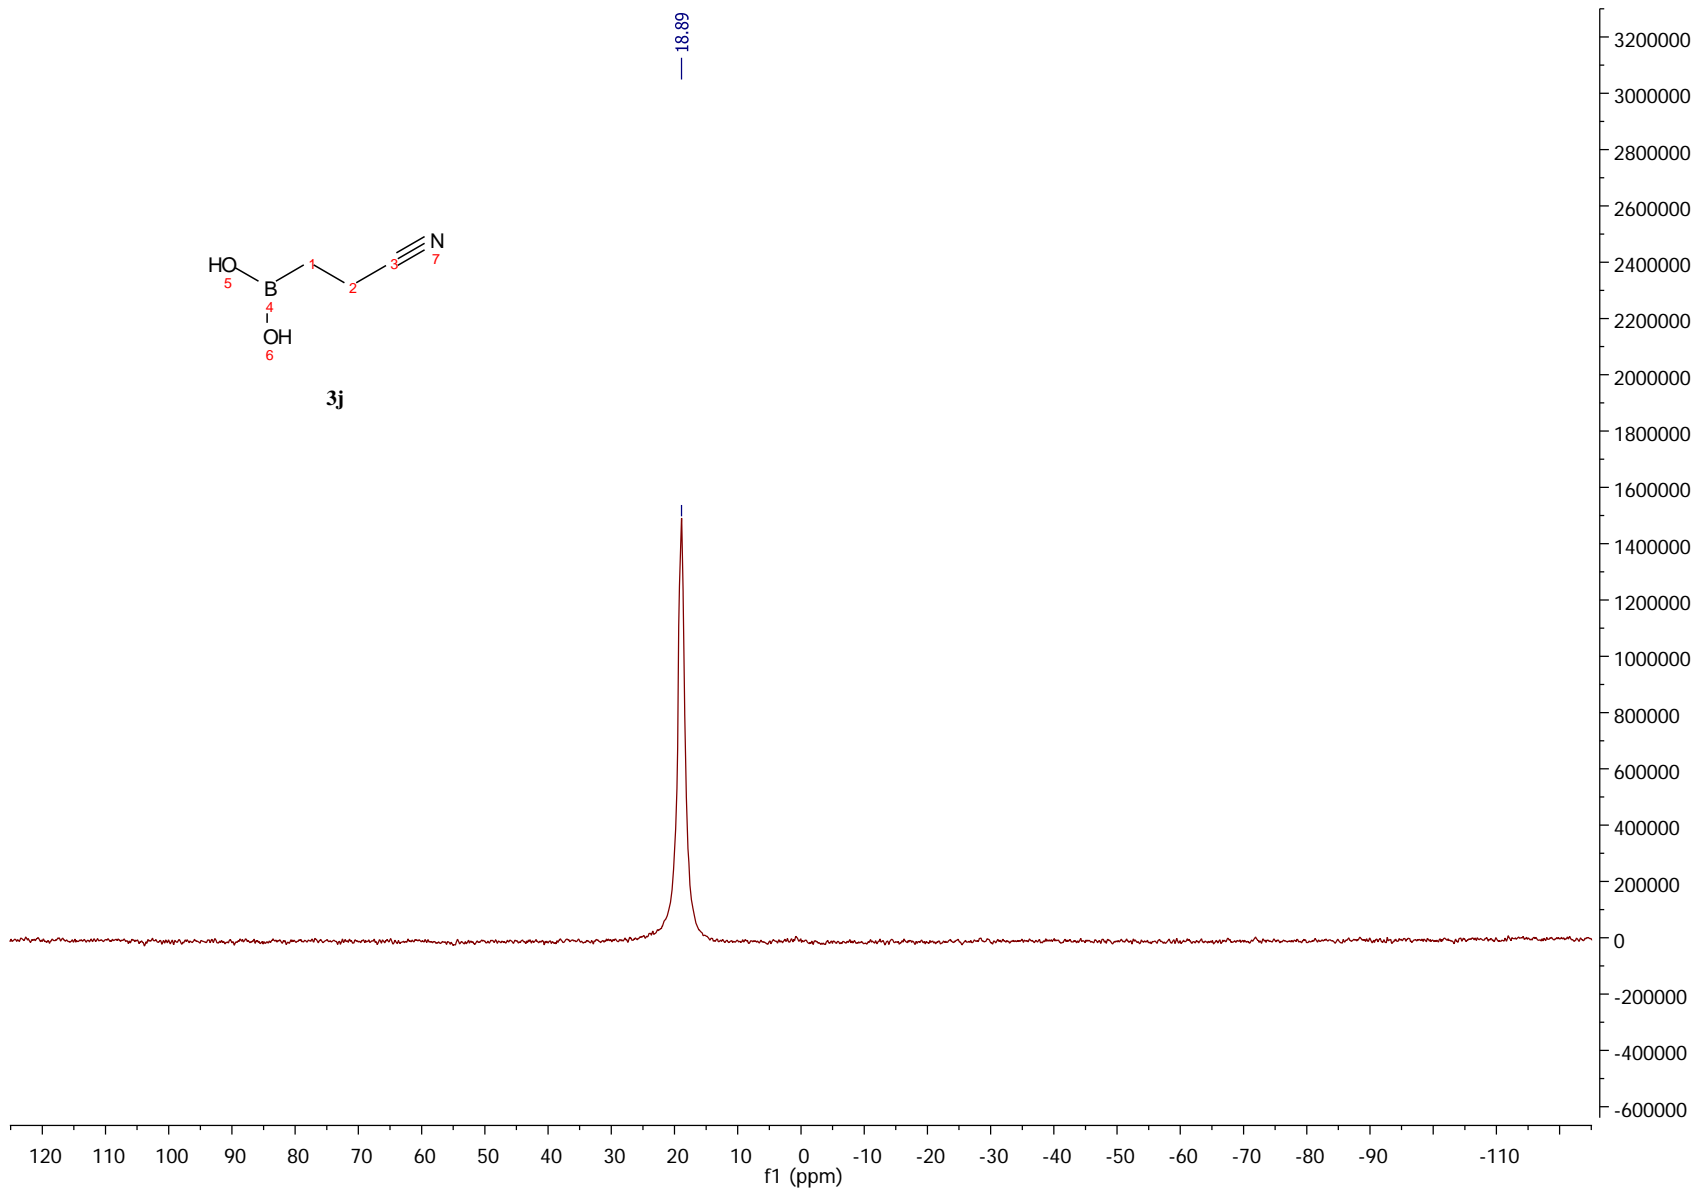

The following spectra (3c-e, 3h, 3i) represent the reisolated pinacol protected boronic ester from the corresponding DEA-adduct (see Table 1).

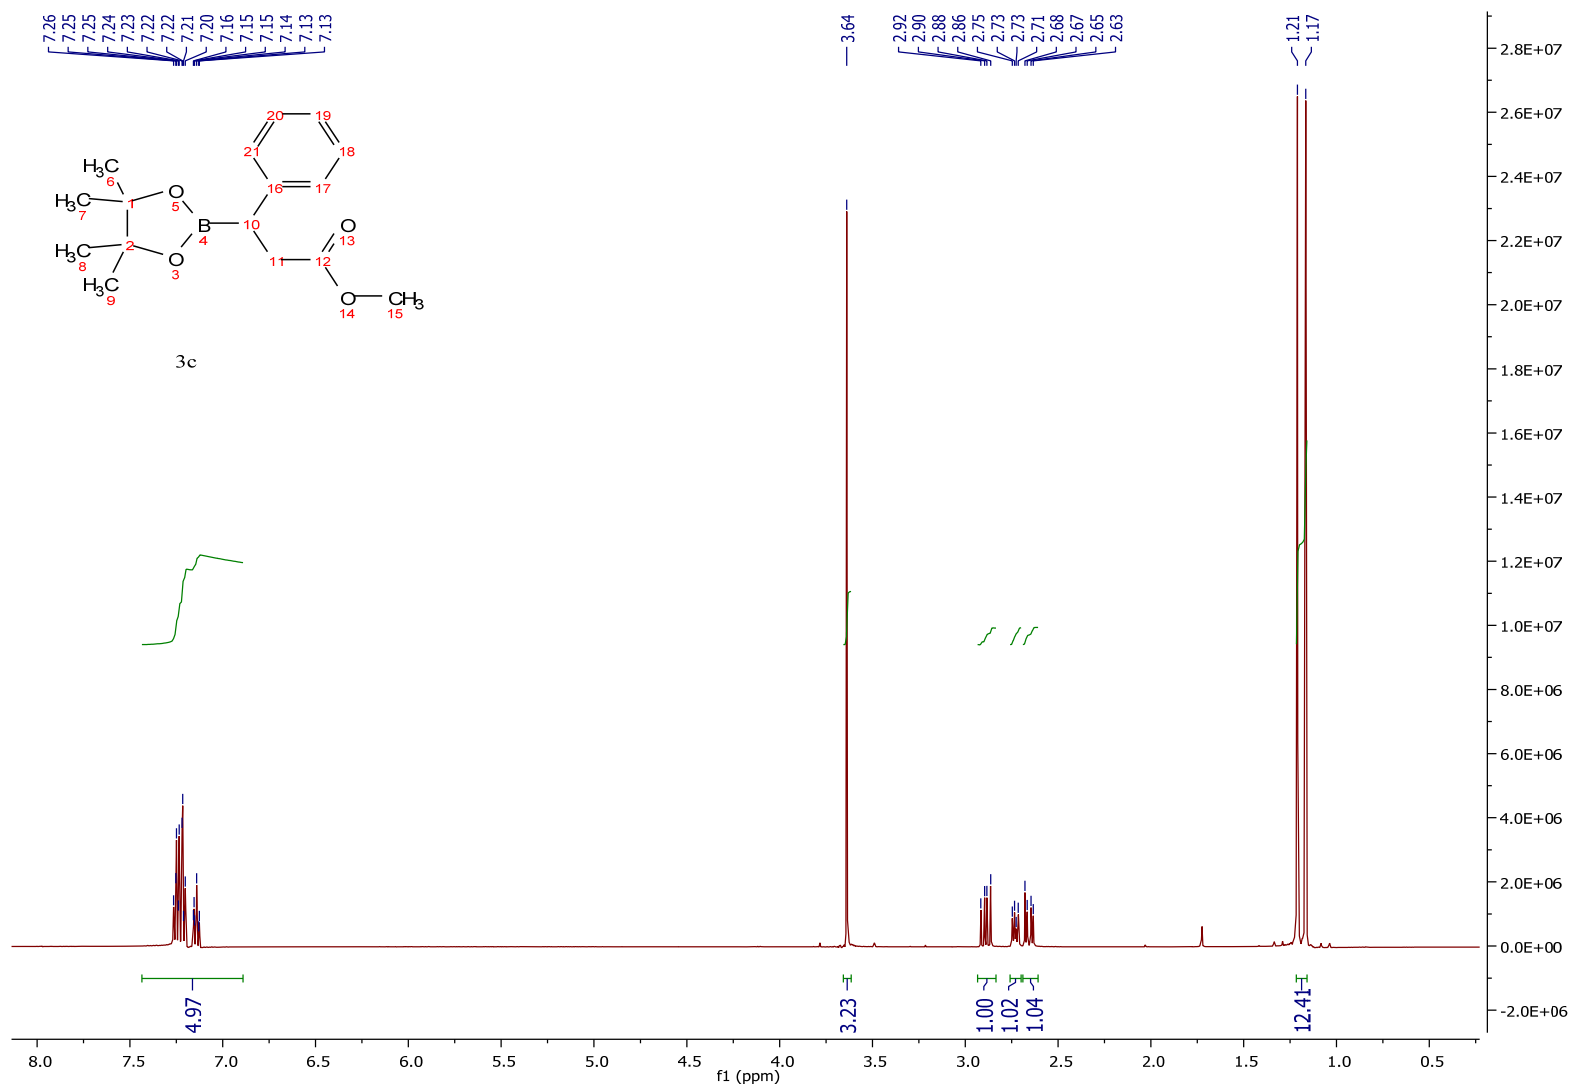

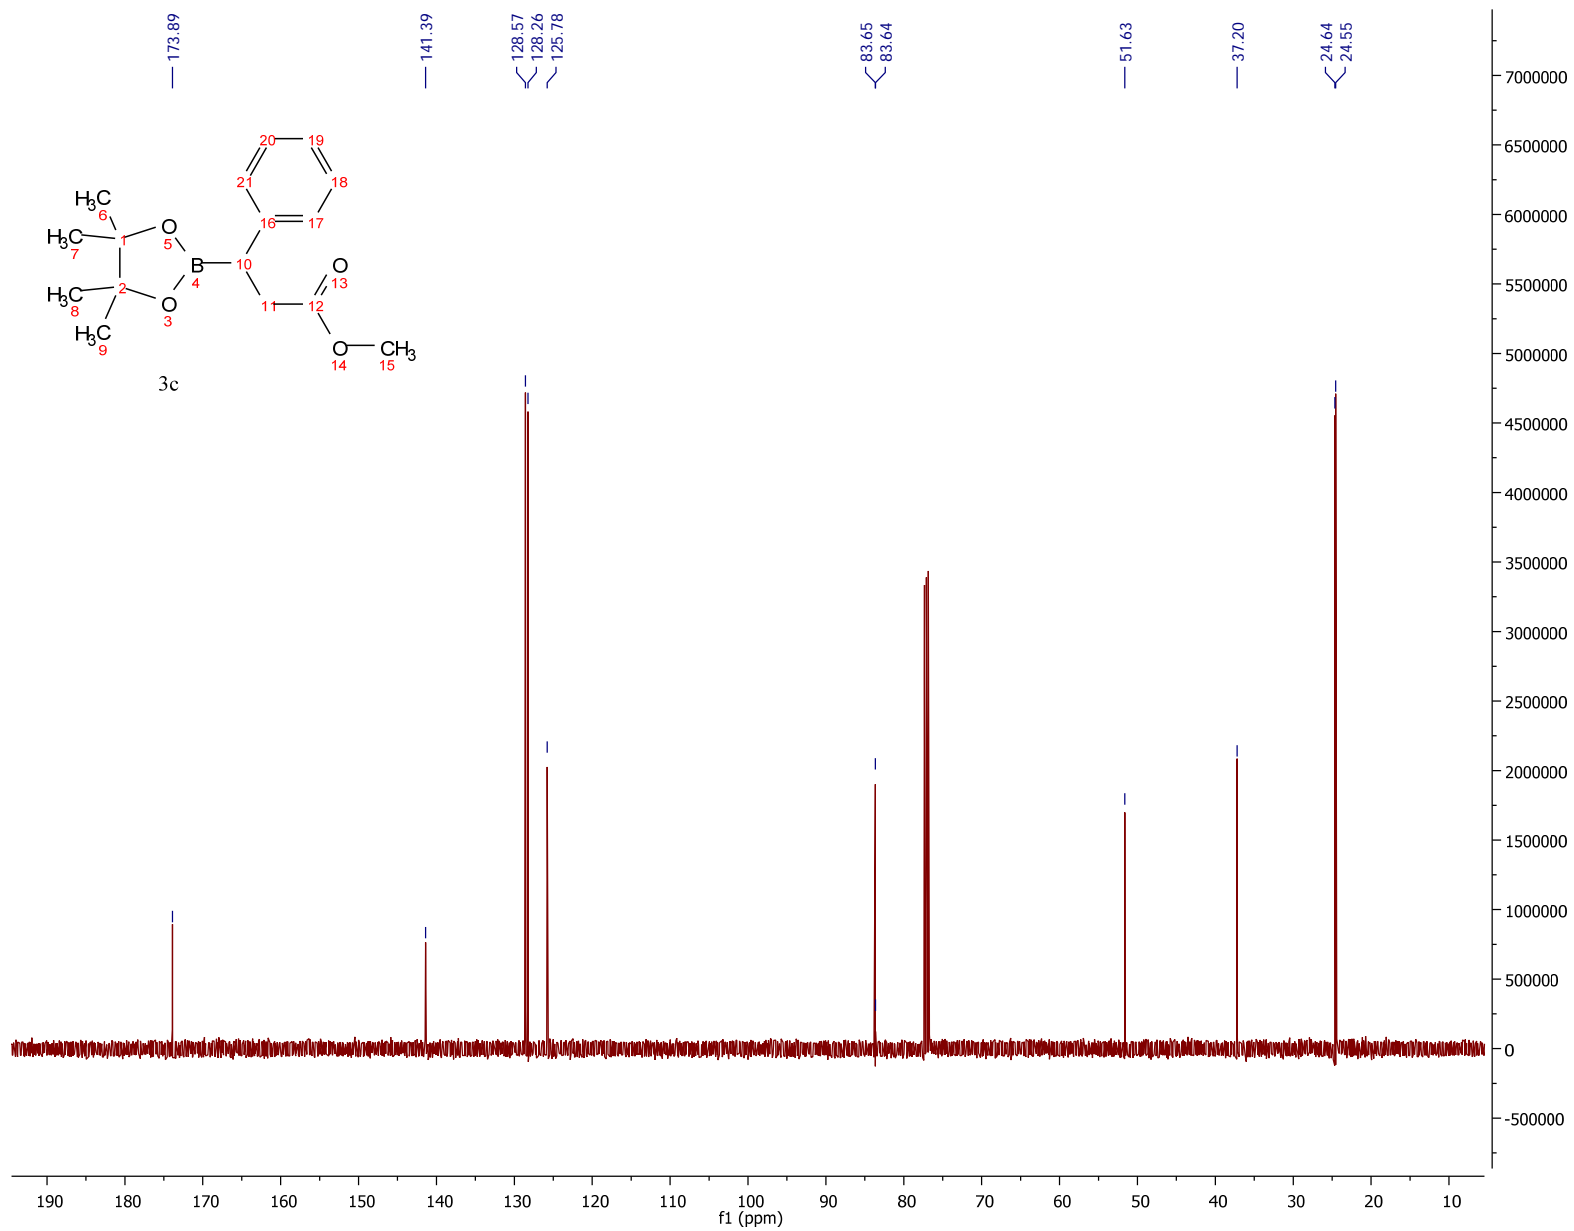

7.27  
7.27  
7.25  
7.24  
7.23  
7.21  
7.16  
7.14  
7.13

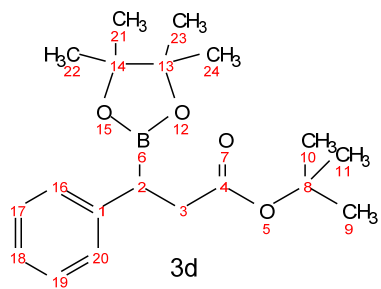

2.83  
2.81  
2.80  
2.78  
2.72  
2.71  
2.70  
2.69  
2.61  
2.60  
2.58  
2.57  
2.18

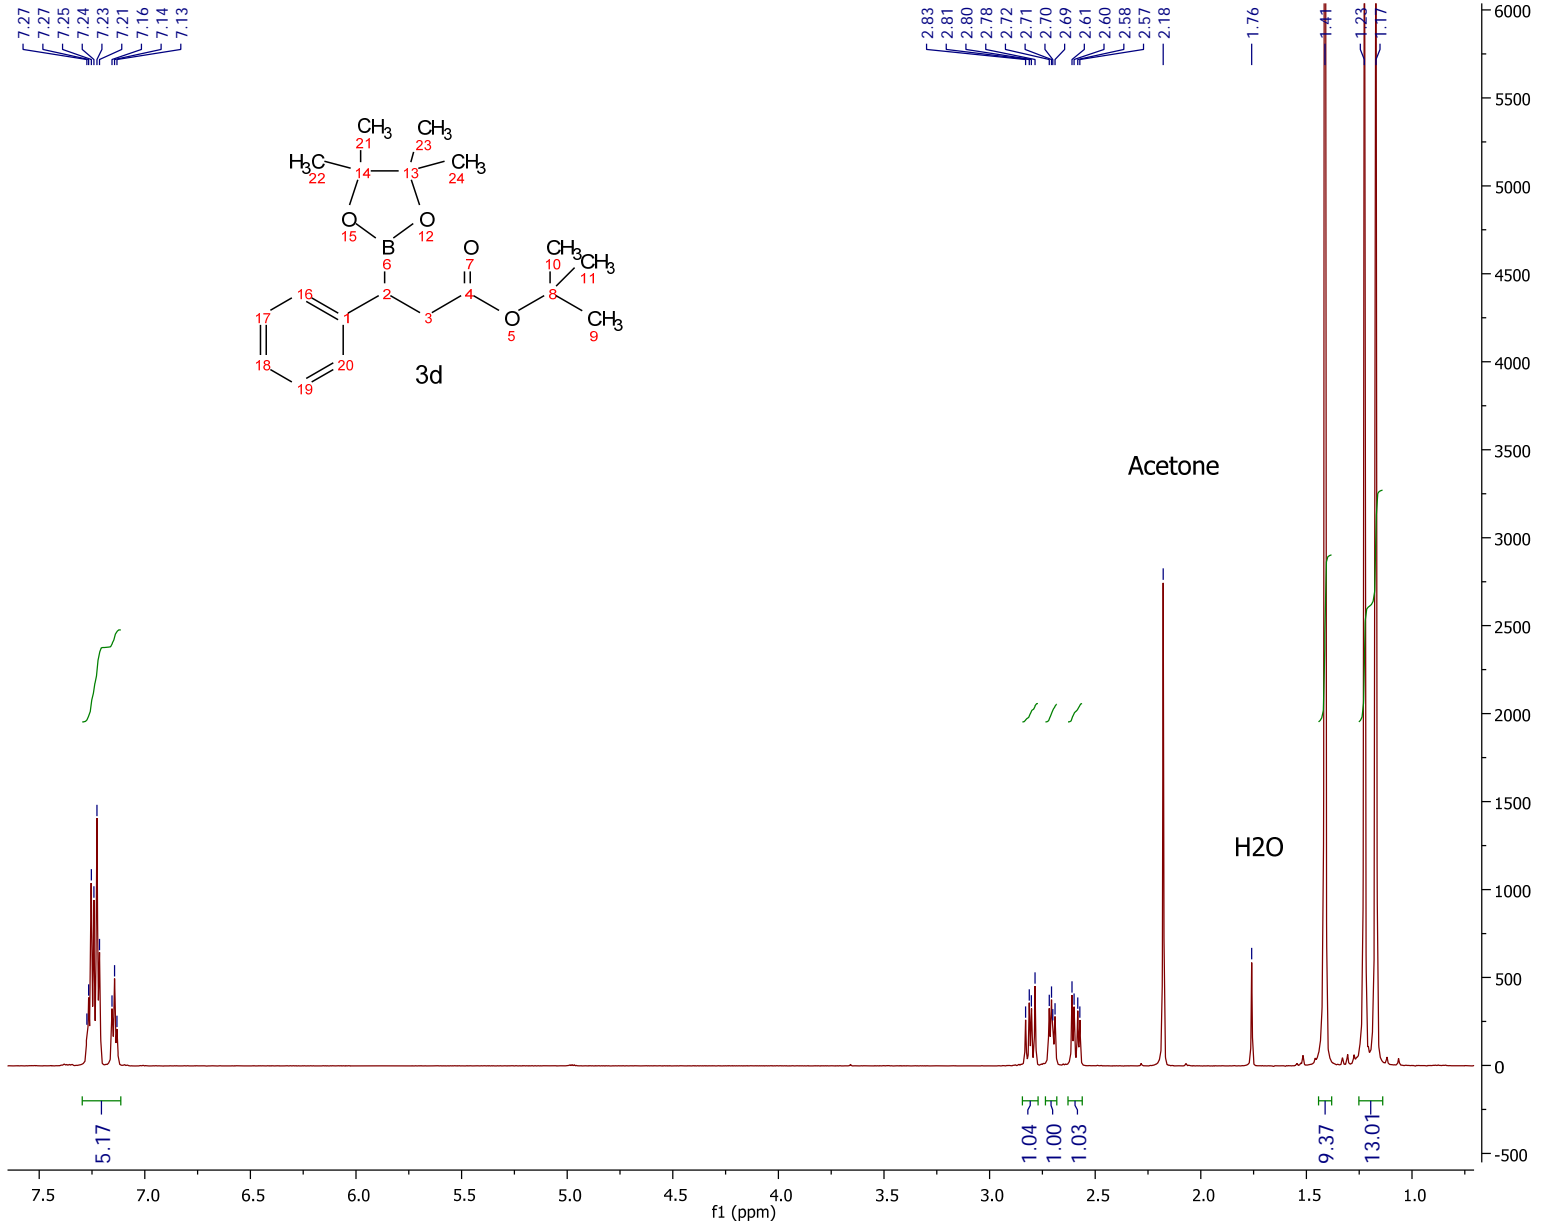

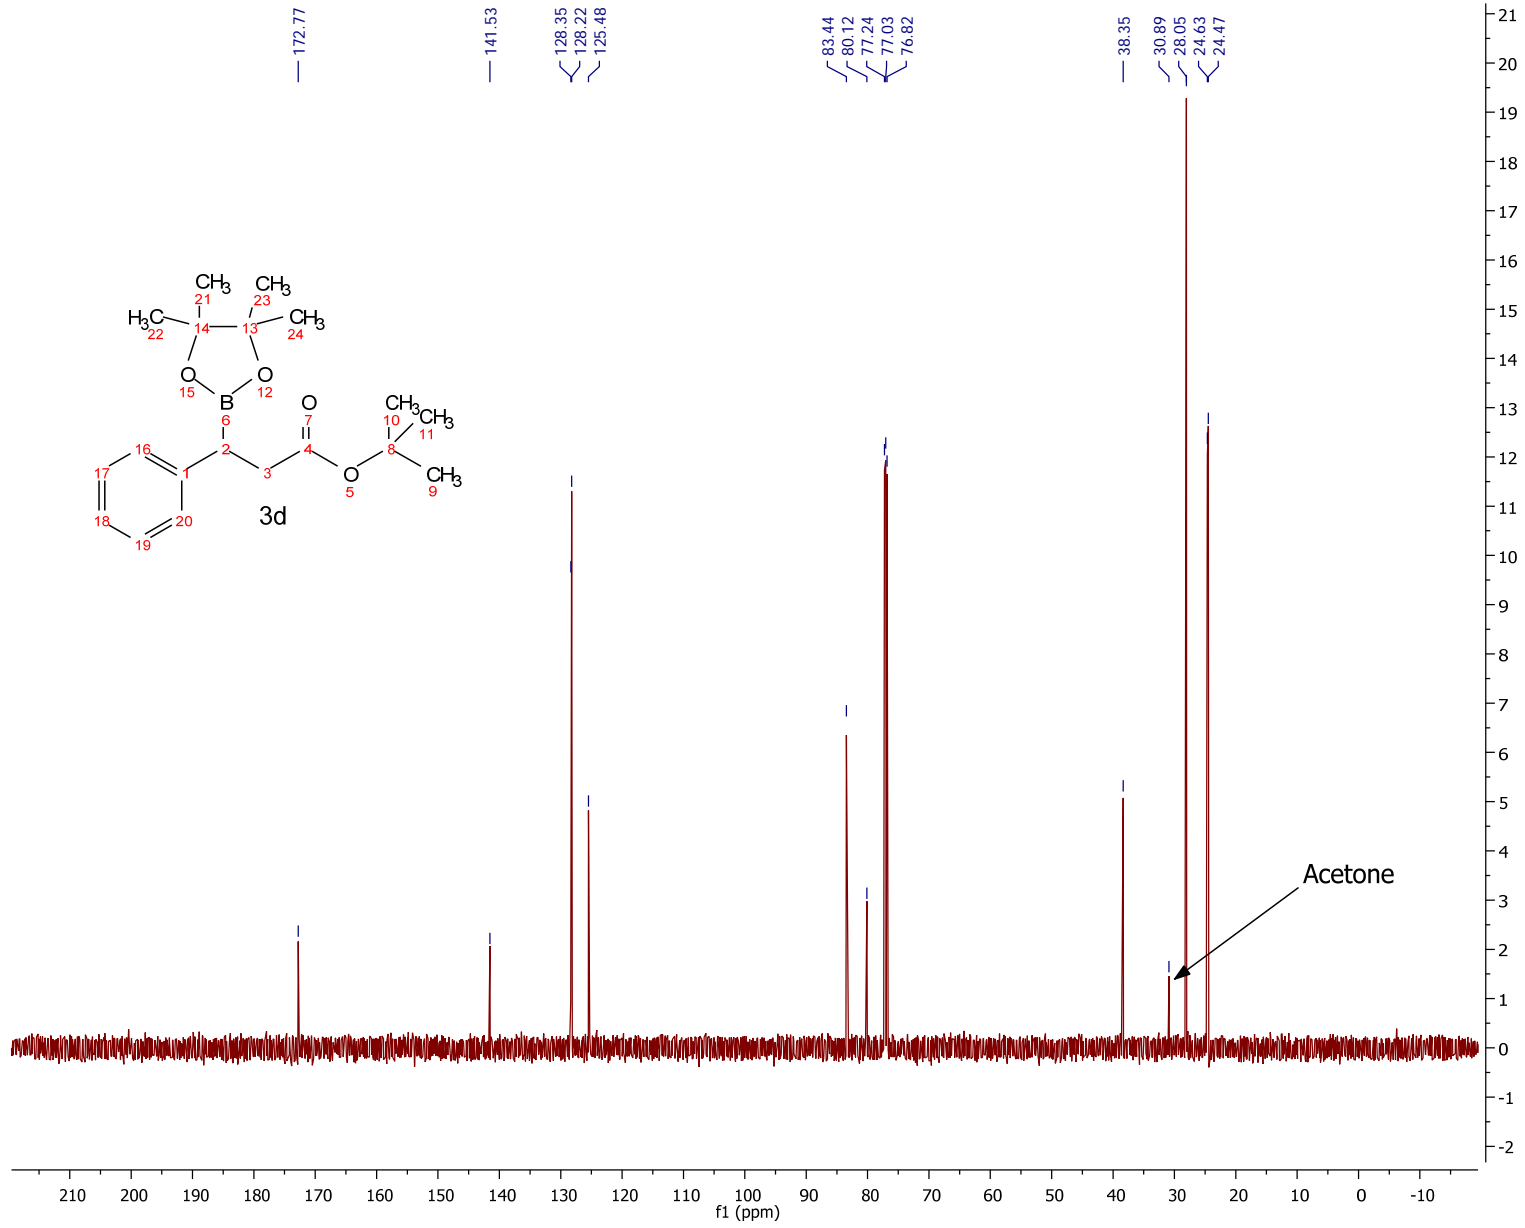

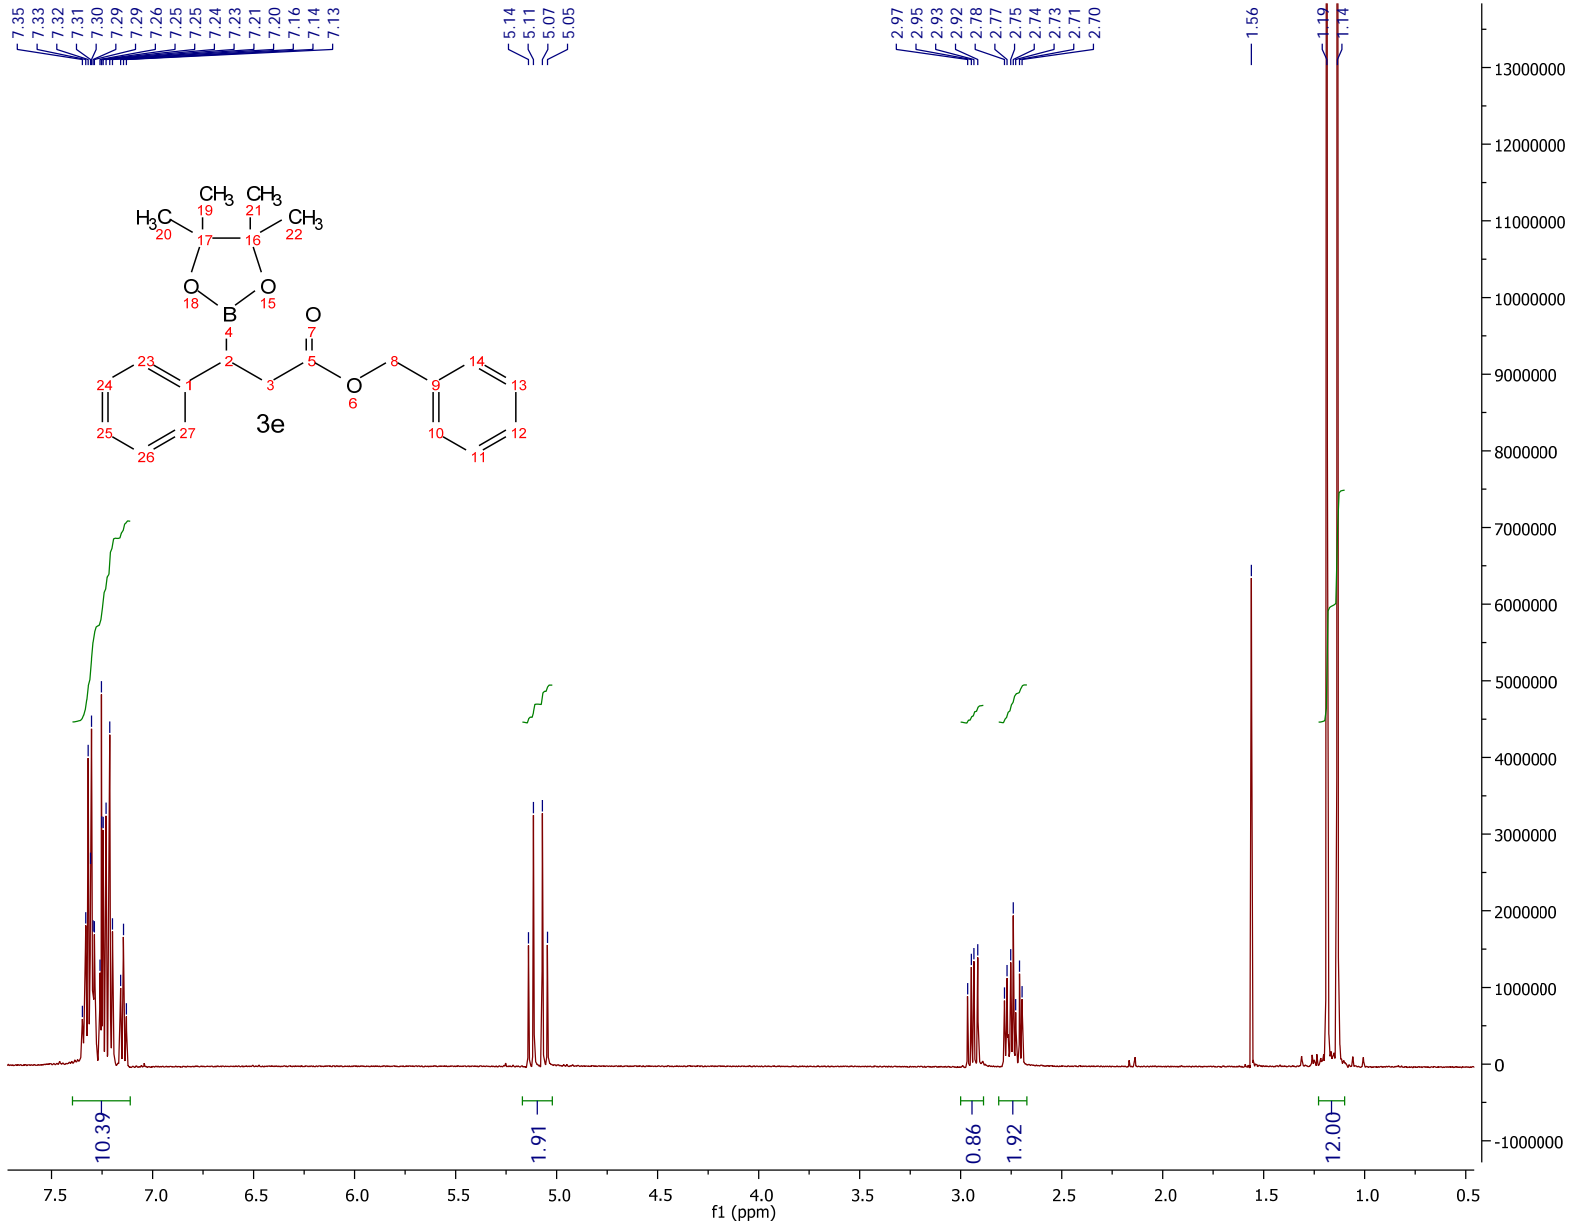

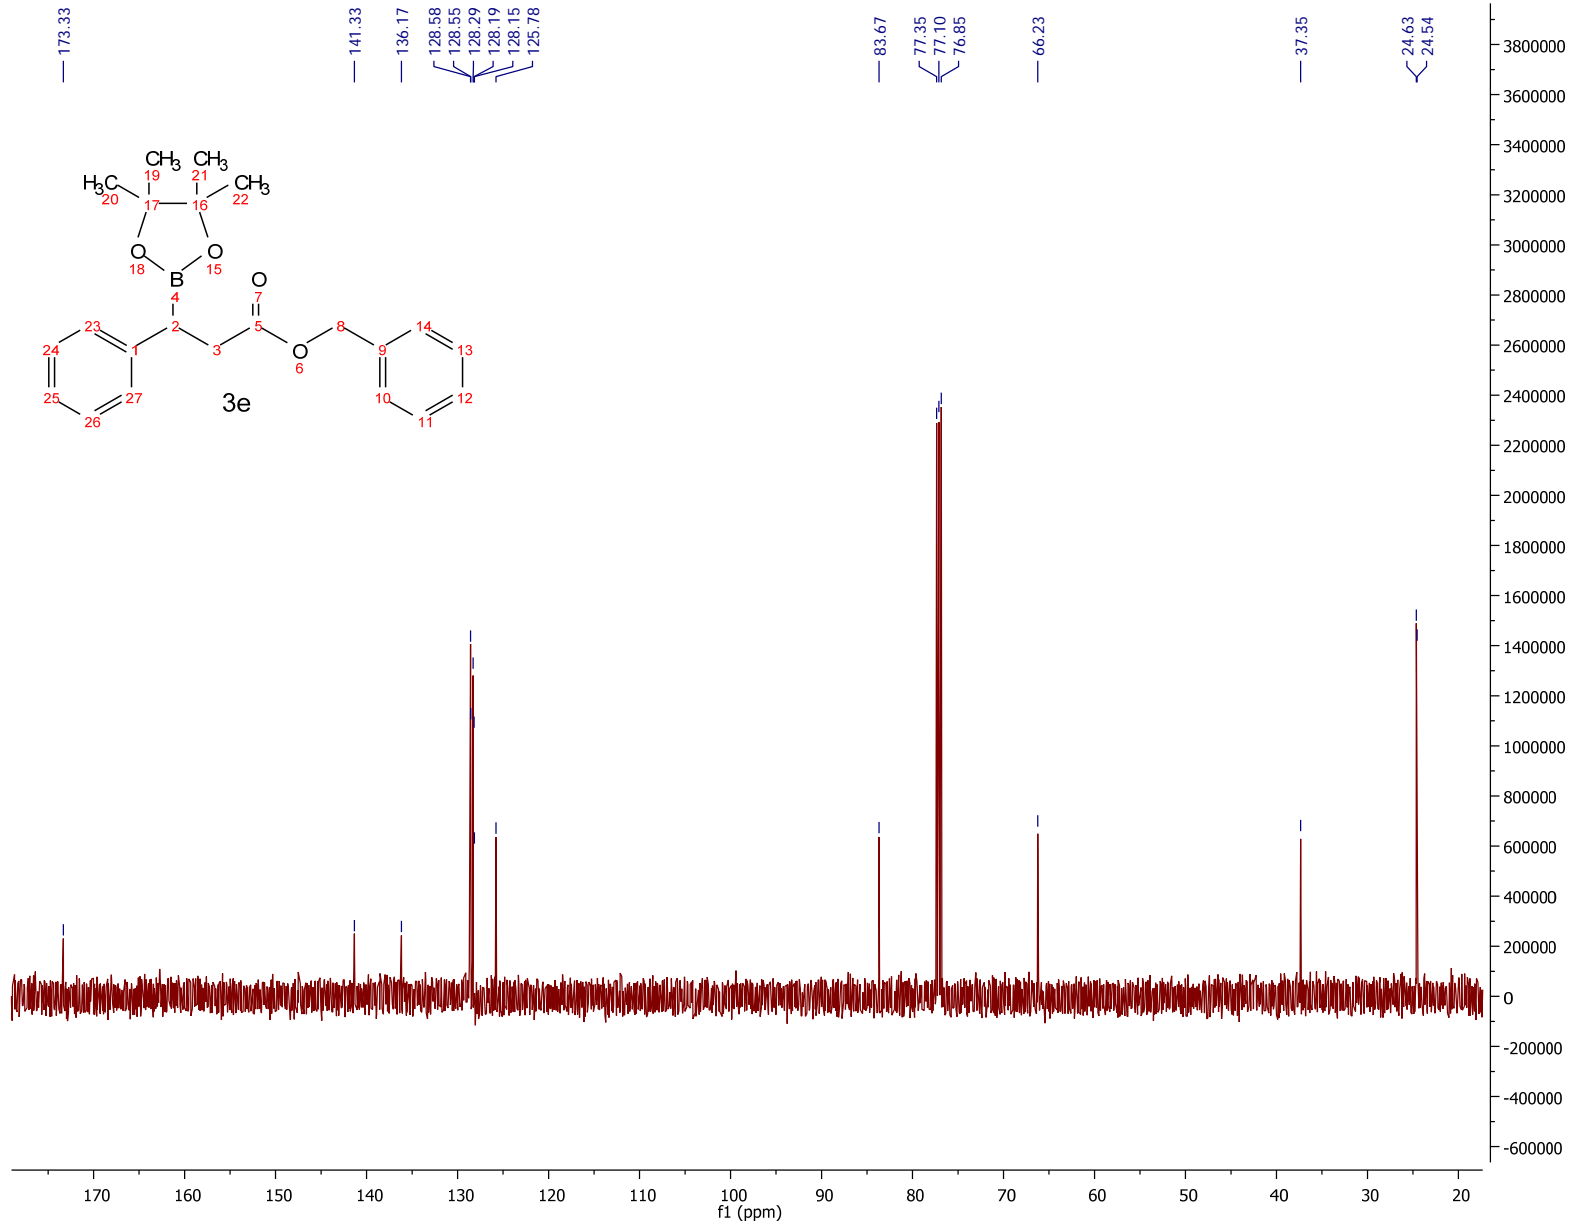





— 221.067

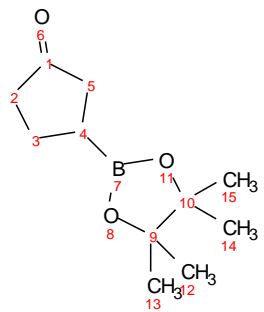

3h

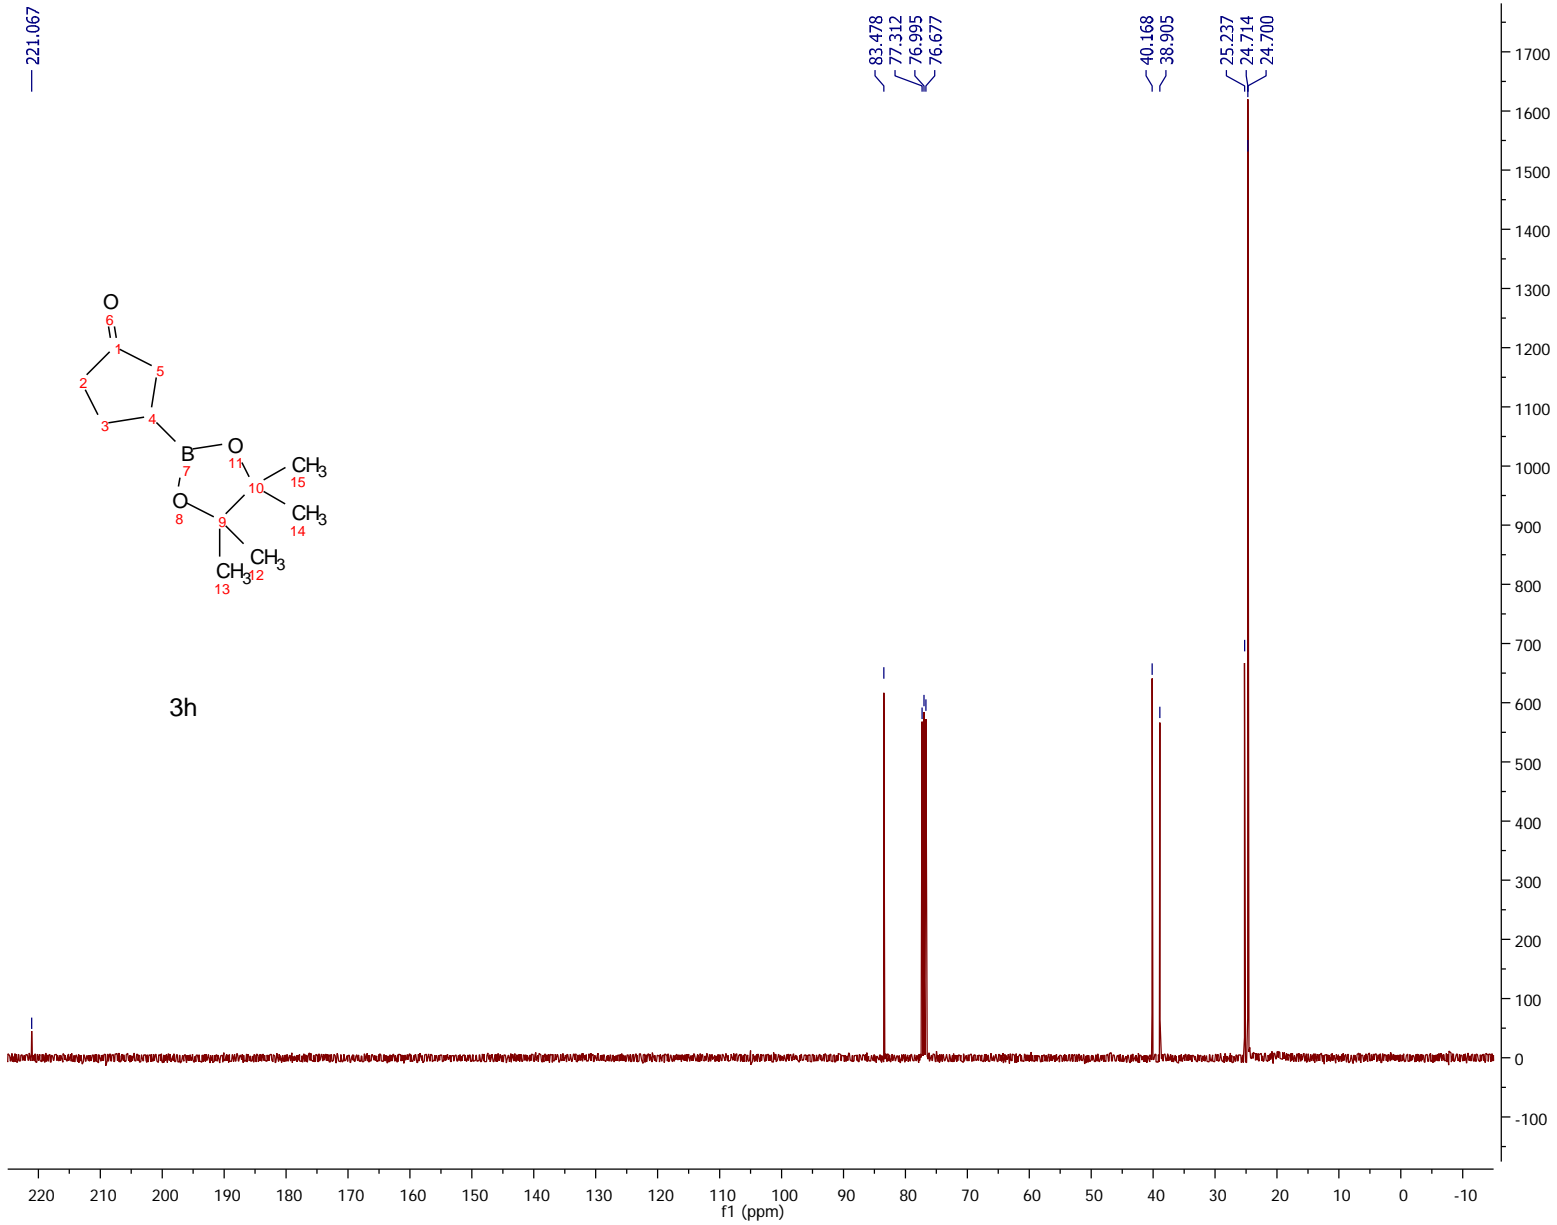

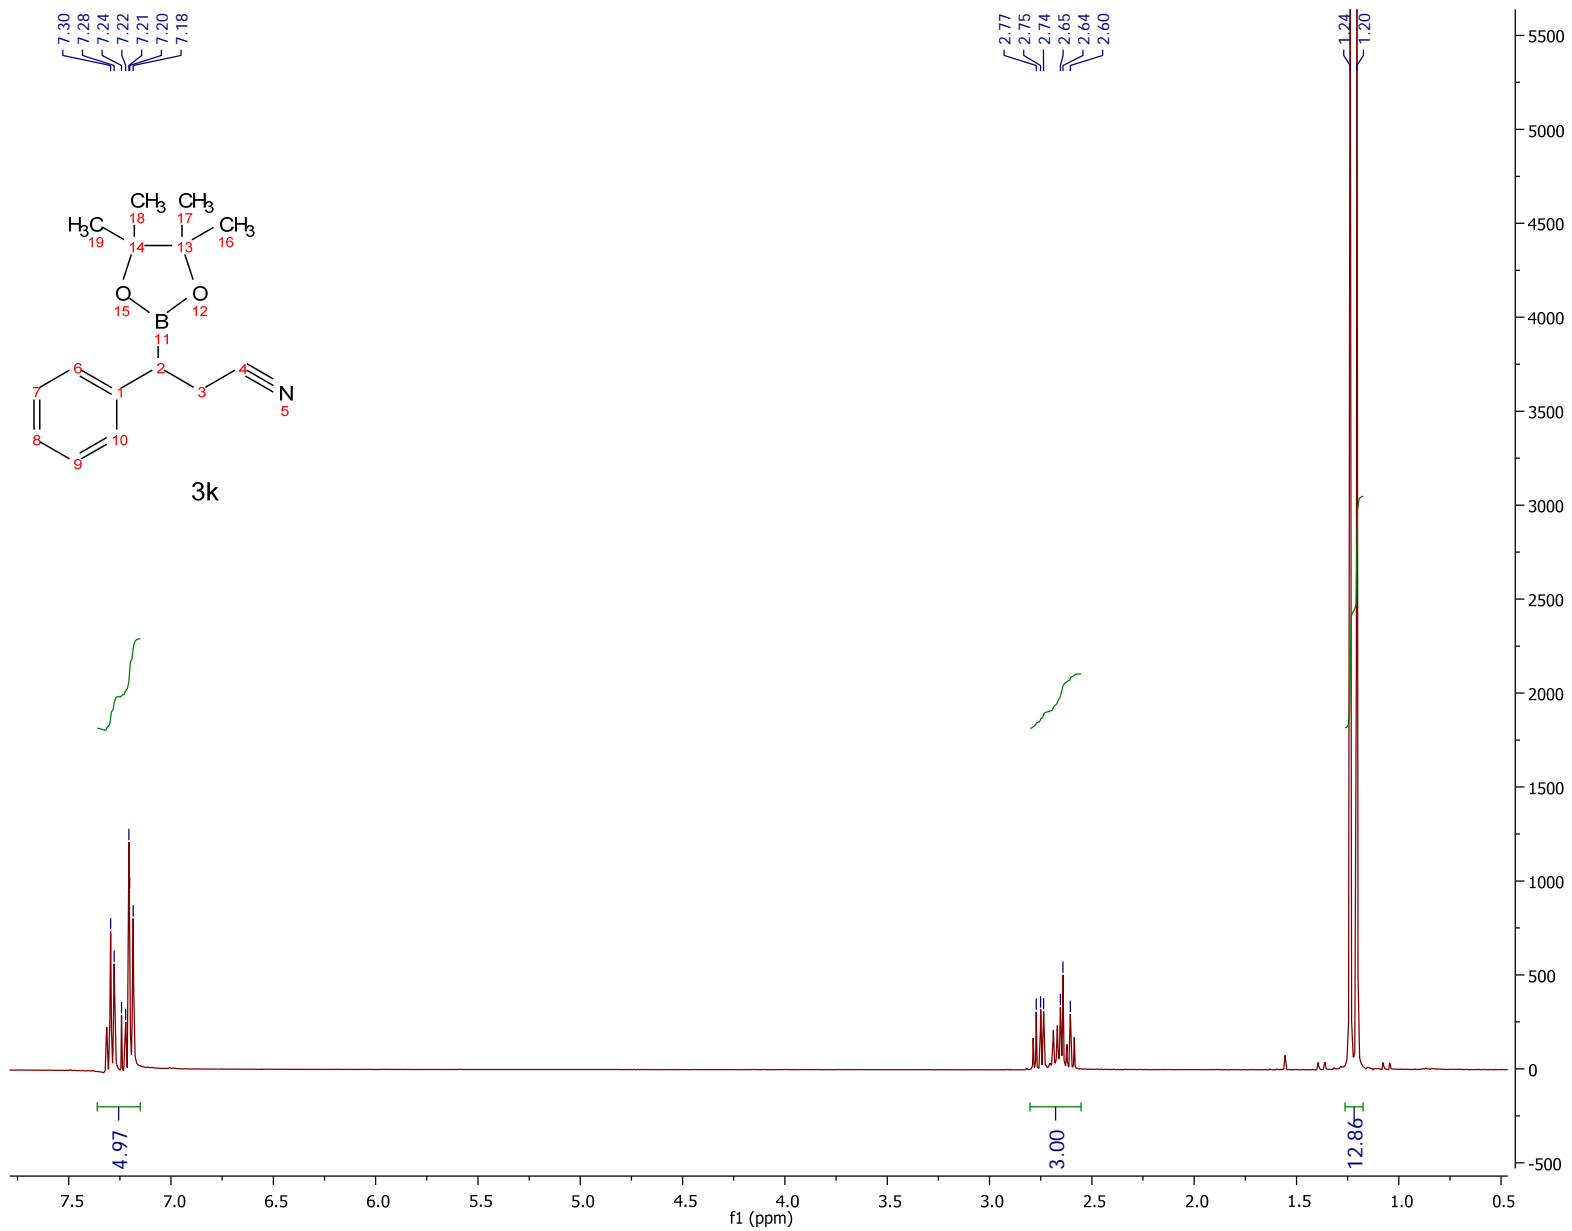

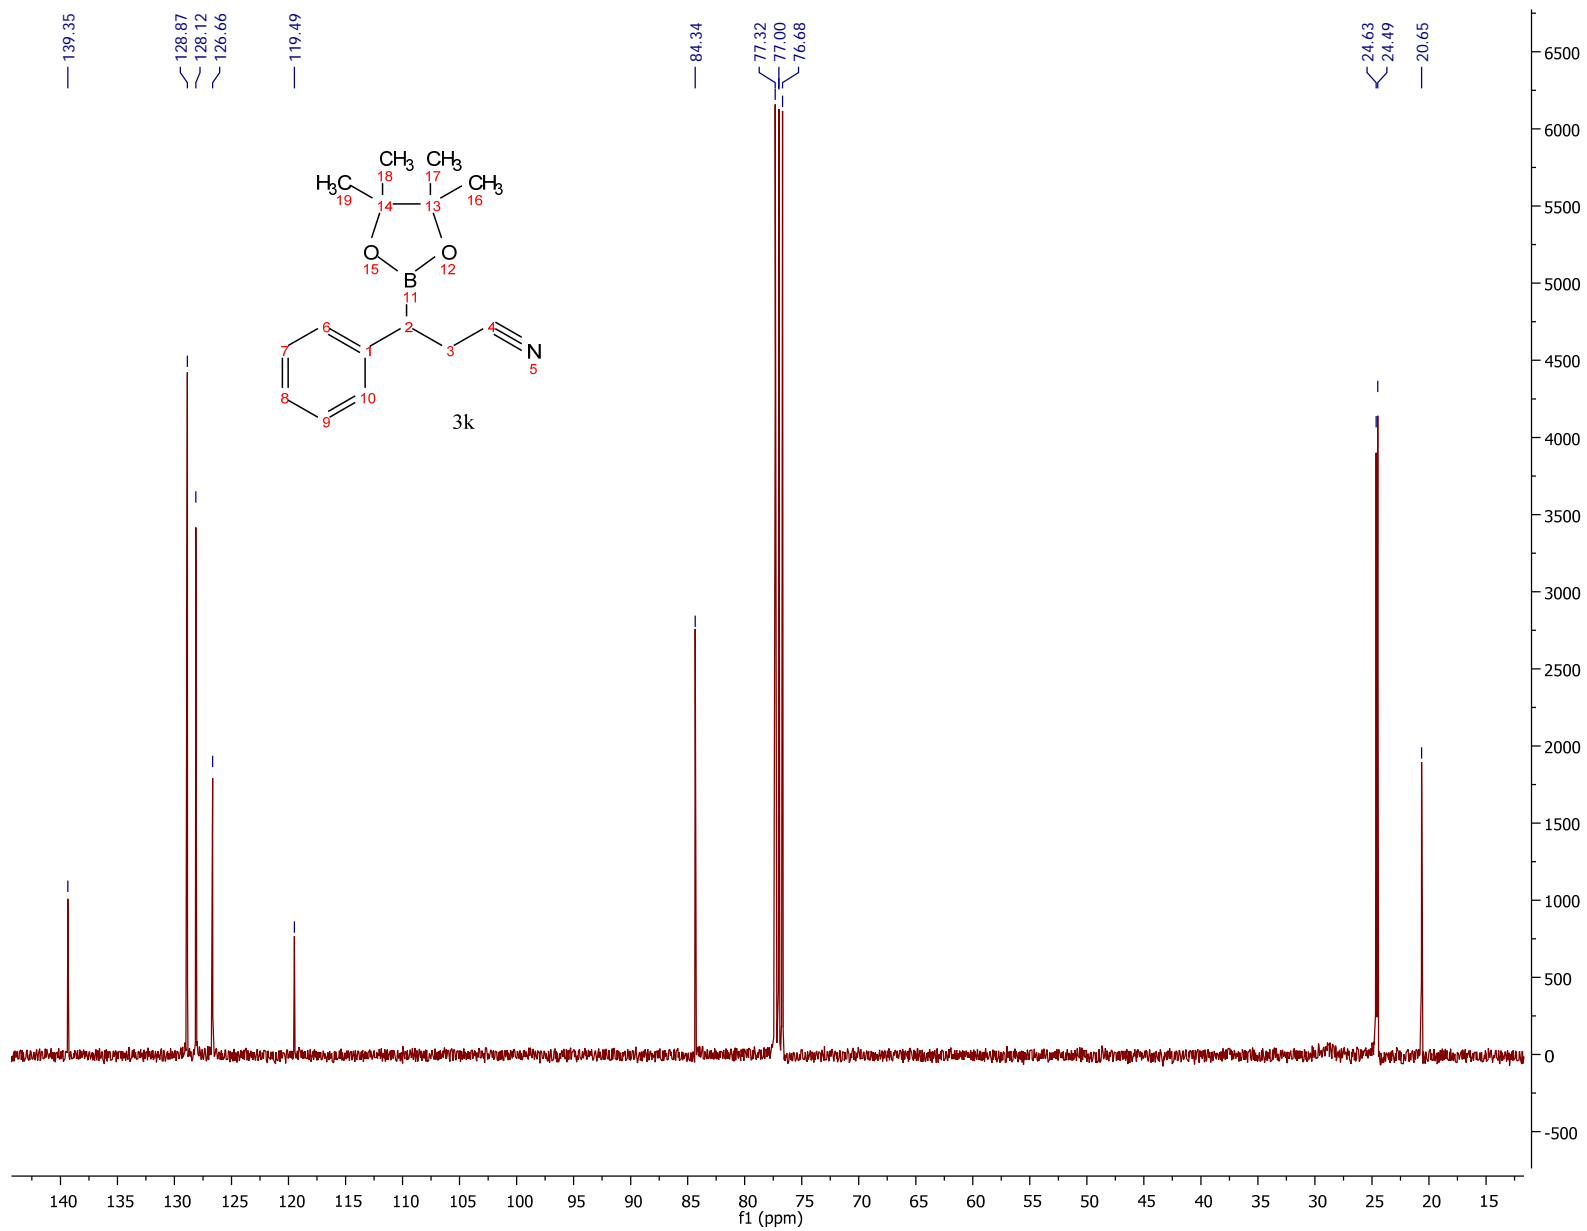

Supplement: NIHMS287132-supplement-2_si_002.pdf [file NIHMS287132-supplement-2_si_002.pdf]
